# Supplementary material for: The real-world safety of Pexidartinib: a pharmacovigilance analysis based on the FDA adverse event reporting system
Source: Research Square preprint supplement (doi:10.21203/rs.3.rs-6283844/v1), 2025-05-06
Supplement: Supplementary file 1 [file 01344cceede32d556c7c1a13.xlsx]

## Sheet: Sheet1
PT	Cases(n)	ROR(95%CI)	PRR(χ2)	EBGM(EBGM05)	IC(IC025)
Fatigue	265	4.53 ( 4 - 5.13 )	4.33 ( 687.45 )	4.33 ( 3.9 )	2.11 ( 1.93 )
Product Dose Omission Issue	245	6.2 ( 5.45 - 7.05 )	5.93 ( 1012.02 )	5.93 ( 5.32 )	2.57 ( 2.38 )
Hair Colour Changes	213	241.97 ( 210.24 - 278.49 )	231.15 ( 46558.1 )	220.49 ( 196.02 )	7.78 ( 7.58 )
Nausea	130	2.47 ( 2.08 - 2.94 )	2.43 ( 110.72 )	2.43 ( 2.1 )	1.28 ( 1.03 )
Pruritus	124	4.31 ( 3.61 - 5.16 )	4.23 ( 307.12 )	4.22 ( 3.64 )	2.08 ( 1.82 )
Rash	89	2.68 ( 2.17 - 3.31 )	2.65 ( 92.07 )	2.65 ( 2.22 )	1.41 ( 1.1 )
Off Label Use	74	0.81 ( 0.65 - 1.02 )	0.82 ( 3.17 )	0.82 ( 0.67 )	-0.3 ( -0.63 )
Diarrhoea	73	1.45 ( 1.15 - 1.83 )	1.45 ( 10.16 )	1.45 ( 1.19 )	0.53 ( 0.19 )
Pain	70	1.26 ( 0.99 - 1.59 )	1.25 ( 3.62 )	1.25 ( 1.03 )	0.33 ( -0.02 )
Product Dose Omission In Error	61	18.4 ( 14.29 - 23.7 )	18.18 ( 987.12 )	18.11 ( 14.66 )	4.18 ( 3.81 )
Aspartate Aminotransferase Increased	59	19.51 ( 15.09 - 25.24 )	19.28 ( 1019.28 )	19.21 ( 15.49 )	4.26 ( 3.89 )
Headache	56	1.29 ( 0.99 - 1.68 )	1.29 ( 3.65 )	1.29 ( 1.03 )	0.37 ( -0.02 )
No Adverse Event	51	3.29 ( 2.5 - 4.34 )	3.27 ( 80.55 )	3.27 ( 2.59 )	1.71 ( 1.31 )
Arthralgia	50	1.47 ( 1.11 - 1.94 )	1.46 ( 7.35 )	1.46 ( 1.16 )	0.55 ( 0.14 )
Alanine Aminotransferase Increased	49	13.35 ( 10.07 - 17.7 )	13.22 ( 552.46 )	13.19 ( 10.42 )	3.72 ( 3.31 )
Therapy Cessation	48	10.25 ( 7.71 - 13.62 )	10.15 ( 395.69 )	10.13 ( 7.99 )	3.34 ( 2.93 )
Periorbital Swelling	46	59.39 ( 44.35 - 79.55 )	58.83 ( 2583.35 )	58.12 ( 45.52 )	5.86 ( 5.44 )
Dizziness	46	1.41 ( 1.05 - 1.88 )	1.4 ( 5.37 )	1.4 ( 1.1 )	0.49 ( 0.07 )
Abdominal Discomfort	41	2.99 ( 2.2 - 4.07 )	2.97 ( 53.79 )	2.97 ( 2.3 )	1.57 ( 1.12 )
Hepatic Enzyme Increased	41	7.51 ( 5.52 - 10.21 )	7.45 ( 228.92 )	7.44 ( 5.75 )	2.9 ( 2.45 )
Swelling Face	38	9.45 ( 6.87 - 13.01 )	9.39 ( 284.39 )	9.37 ( 7.17 )	3.23 ( 2.76 )
Covid-19	37	1.12 ( 0.81 - 1.54 )	1.12 ( 0.45 )	1.12 ( 0.85 )	0.16 ( -0.31 )
Vomiting	36	1.16 ( 0.84 - 1.61 )	1.16 ( 0.79 )	1.16 ( 0.88 )	0.21 ( -0.26 )
Eye Swelling	35	14.54 ( 10.42 - 20.29 )	14.44 ( 436.73 )	14.4 ( 10.9 )	3.85 ( 3.36 )
Feeling Abnormal	35	2.21 ( 1.59 - 3.09 )	2.2 ( 23.08 )	2.2 ( 1.67 )	1.14 ( 0.66 )
Decreased Appetite	35	1.98 ( 1.42 - 2.76 )	1.97 ( 16.84 )	1.97 ( 1.49 )	0.98 ( 0.5 )
Product Use Issue	35	2.27 ( 1.63 - 3.17 )	2.26 ( 24.72 )	2.26 ( 1.71 )	1.18 ( 0.69 )
Somnolence	33	2.44 ( 1.73 - 3.44 )	2.43 ( 27.81 )	2.43 ( 1.82 )	1.28 ( 0.78 )
Asthenia	33	1.28 ( 0.91 - 1.8 )	1.28 ( 1.99 )	1.28 ( 0.96 )	0.35 ( -0.14 )
Constipation	33	2.03 ( 1.44 - 2.86 )	2.02 ( 17.08 )	2.02 ( 1.52 )	1.01 ( 0.52 )
Skin Discolouration	32	9.96 ( 7.03 - 14.11 )	9.9 ( 255.7 )	9.88 ( 7.39 )	3.3 ( 2.8 )
Malaise	32	1.11 ( 0.78 - 1.57 )	1.11 ( 0.33 )	1.11 ( 0.83 )	0.15 ( -0.36 )
Taste Disorder	30	10.22 ( 7.14 - 14.64 )	10.16 ( 247.49 )	10.14 ( 7.51 )	3.34 ( 2.82 )
Liver Function Test Increased	30	14.14 ( 9.87 - 20.25 )	14.05 ( 362.84 )	14.02 ( 10.37 )	3.81 ( 3.29 )
Alopecia	28	1.88 ( 1.3 - 2.73 )	1.88 ( 11.49 )	1.88 ( 1.37 )	0.91 ( 0.37 )
Treatment Noncompliance	28	7.21 ( 4.97 - 10.45 )	7.17 ( 148.6 )	7.16 ( 5.25 )	2.84 ( 2.3 )
Joint Swelling	27	2.51 ( 1.72 - 3.66 )	2.5 ( 24.36 )	2.5 ( 1.82 )	1.32 ( 0.77 )
Pain In Extremity	27	1.33 ( 0.91 - 1.95 )	1.33 ( 2.24 )	1.33 ( 0.97 )	0.41 ( -0.13 )
Adverse Drug Reaction	27	3.36 ( 2.3 - 4.9 )	3.34 ( 44.37 )	3.34 ( 2.43 )	1.74 ( 1.19 )
Therapy Interrupted	27	2.68 ( 1.84 - 3.92 )	2.67 ( 28.32 )	2.67 ( 1.95 )	1.42 ( 0.87 )
Surgery	25	5.54 ( 3.74 - 8.21 )	5.51 ( 92.36 )	5.51 ( 3.96 )	2.46 ( 1.89 )
Dysgeusia	25	5.62 ( 3.79 - 8.32 )	5.59 ( 94.27 )	5.59 ( 4.02 )	2.48 ( 1.91 )
Abdominal Pain Upper	25	1.75 ( 1.18 - 2.59 )	1.74 ( 7.95 )	1.74 ( 1.25 )	0.8 ( 0.23 )
Hypertension	25	1.63 ( 1.1 - 2.42 )	1.63 ( 6.1 )	1.63 ( 1.17 )	0.7 ( 0.14 )
Memory Impairment	24	2.36 ( 1.58 - 3.52 )	2.35 ( 18.65 )	2.35 ( 1.68 )	1.23 ( 0.65 )
Peripheral Swelling	24	1.63 ( 1.09 - 2.44 )	1.63 ( 5.88 )	1.63 ( 1.17 )	0.71 ( 0.13 )
Incorrect Dose Administered	24	1.23 ( 0.82 - 1.84 )	1.23 ( 1.04 )	1.23 ( 0.88 )	0.3 ( -0.28 )
White Blood Cell Count Decreased	23	2.52 ( 1.67 - 3.8 )	2.51 ( 20.96 )	2.51 ( 1.78 )	1.33 ( 0.74 )
Gamma-Glutamyltransferase Increased	23	19.92 ( 13.21 - 30.04 )	19.83 ( 409.67 )	19.75 ( 14.01 )	4.3 ( 3.71 )
Pyrexia	23	0.92 ( 0.61 - 1.38 )	0.92 ( 0.17 )	0.92 ( 0.65 )	-0.13 ( -0.72 )
Illness	21	1.42 ( 0.93 - 2.18 )	1.42 ( 2.62 )	1.42 ( 0.99 )	0.51 ( -0.11 )
Blood Pressure Increased	21	1.77 ( 1.15 - 2.71 )	1.76 ( 6.94 )	1.76 ( 1.23 )	0.82 ( 0.2 )
Paraesthesia	21	2.06 ( 1.34 - 3.16 )	2.05 ( 11.35 )	2.05 ( 1.43 )	1.04 ( 0.42 )
Disease Progression	20	2.03 ( 1.31 - 3.16 )	2.03 ( 10.48 )	2.03 ( 1.41 )	1.02 ( 0.39 )
Laboratory Test Abnormal	20	9.3 ( 5.99 - 14.44 )	9.27 ( 147.33 )	9.25 ( 6.41 )	3.21 ( 2.58 )
Abdominal Pain	19	1.2 ( 0.77 - 1.89 )	1.2 ( 0.64 )	1.2 ( 0.82 )	0.26 ( -0.38 )
Blood Alkaline Phosphatase Increased	19	16.31 ( 10.38 - 25.61 )	16.24 ( 270.95 )	16.19 ( 11.1 )	4.02 ( 3.37 )
Drug Ineffective	19	0.17 ( 0.11 - 0.27 )	0.18 ( 75.44 )	0.18 ( 0.12 )	-2.51 ( -3.16 )
Dyspepsia	19	2.94 ( 1.88 - 4.62 )	2.94 ( 24.27 )	2.93 ( 2.01 )	1.55 ( 0.91 )
Blood Bilirubin Increased	18	12.09 ( 7.61 - 19.22 )	12.05 ( 181.94 )	12.02 ( 8.16 )	3.59 ( 2.92 )
Brain Fog	18	13.45 ( 8.46 - 21.38 )	13.4 ( 206.03 )	13.37 ( 9.07 )	3.74 ( 3.08 )
Nasopharyngitis	18	1.25 ( 0.79 - 1.99 )	1.25 ( 0.9 )	1.25 ( 0.85 )	0.32 ( -0.34 )
Back Pain	16	0.99 ( 0.61 - 1.61 )	0.99 ( 0 )	0.99 ( 0.66 )	-0.02 ( -0.72 )
Dry Skin	16	1.37 ( 0.84 - 2.23 )	1.36 ( 1.56 )	1.36 ( 0.9 )	0.45 ( -0.25 )
Anxiety	16	0.79 ( 0.48 - 1.29 )	0.79 ( 0.88 )	0.79 ( 0.52 )	-0.34 ( -1.04 )
Erythema	16	1.05 ( 0.64 - 1.72 )	1.05 ( 0.04 )	1.05 ( 0.7 )	0.08 ( -0.63 )
Abdominal Distension	15	2.14 ( 1.29 - 3.56 )	2.14 ( 9.12 )	2.14 ( 1.4 )	1.1 ( 0.37 )
Visual Impairment	15	1.5 ( 0.9 - 2.49 )	1.5 ( 2.48 )	1.5 ( 0.98 )	0.58 ( -0.14 )
Ageusia	15	8.27 ( 4.98 - 13.74 )	8.25 ( 95.41 )	8.24 ( 5.39 )	3.04 ( 2.32 )
Weight Increased	15	0.95 ( 0.57 - 1.57 )	0.95 ( 0.04 )	0.95 ( 0.62 )	-0.08 ( -0.8 )
Vision Blurred	15	1.7 ( 1.02 - 2.83 )	1.7 ( 4.33 )	1.7 ( 1.11 )	0.76 ( 0.04 )
Cough	14	0.61 ( 0.36 - 1.04 )	0.62 ( 3.38 )	0.62 ( 0.4 )	-0.7 ( -1.45 )
Therapy Change	14	16.39 ( 9.69 - 27.72 )	16.34 ( 201.03 )	16.29 ( 10.5 )	4.03 ( 3.28 )
Swelling	13	1.68 ( 0.97 - 2.89 )	1.67 ( 3.53 )	1.67 ( 1.06 )	0.74 ( -0.03 )
Influenza	12	1.44 ( 0.82 - 2.54 )	1.44 ( 1.61 )	1.44 ( 0.9 )	0.53 ( -0.28 )
Dry Mouth	12	2.31 ( 1.31 - 4.06 )	2.3 ( 8.84 )	2.3 ( 1.43 )	1.2 ( 0.4 )
Hypoaesthesia	12	1.2 ( 0.68 - 2.11 )	1.2 ( 0.39 )	1.2 ( 0.74 )	0.26 ( -0.54 )
Depression	12	0.89 ( 0.51 - 1.57 )	0.89 ( 0.16 )	0.89 ( 0.56 )	-0.16 ( -0.97 )
Weight Decreased	12	0.57 ( 0.32 - 1 )	0.57 ( 3.9 )	0.57 ( 0.36 )	-0.81 ( -1.61 )
Acne	12	1.73 ( 0.98 - 3.05 )	1.73 ( 3.7 )	1.73 ( 1.08 )	0.79 ( -0.01 )
Dehydration	11	1.36 ( 0.75 - 2.46 )	1.36 ( 1.06 )	1.36 ( 0.83 )	0.45 ( -0.39 )
Dyspnoea	11	0.27 ( 0.15 - 0.49 )	0.27 ( 21.35 )	0.27 ( 0.17 )	-1.87 ( -2.7 )
Depressed Mood	11	2.85 ( 1.58 - 5.15 )	2.85 ( 13.17 )	2.84 ( 1.73 )	1.51 ( 0.67 )
Hypersensitivity	11	0.78 ( 0.43 - 1.41 )	0.78 ( 0.66 )	0.78 ( 0.48 )	-0.35 ( -1.19 )
Photosensitivity Reaction	11	9.55 ( 5.28 - 17.27 )	9.53 ( 83.83 )	9.51 ( 5.8 )	3.25 ( 2.41 )
Insomnia	11	0.66 ( 0.36 - 1.19 )	0.66 ( 1.97 )	0.66 ( 0.4 )	-0.61 ( -1.44 )
Lethargy	11	3.25 ( 1.8 - 5.87 )	3.24 ( 17.05 )	3.24 ( 1.97 )	1.7 ( 0.86 )
Therapeutic Response Unexpected	10	3.38 ( 1.81 - 6.28 )	3.37 ( 16.67 )	3.37 ( 2 )	1.75 ( 0.88 )
Fall	10	0.43 ( 0.23 - 0.8 )	0.43 ( 7.61 )	0.43 ( 0.26 )	-1.22 ( -2.09 )
Rash Pruritic	10	2.69 ( 1.45 - 5 )	2.69 ( 10.58 )	2.68 ( 1.6 )	1.42 ( 0.55 )
Sensitive Skin	10	9.73 ( 5.23 - 18.1 )	9.71 ( 77.96 )	9.69 ( 5.76 )	3.28 ( 2.4 )
Nasal Congestion	10	2.12 ( 1.14 - 3.94 )	2.12 ( 5.91 )	2.12 ( 1.26 )	1.08 ( 0.21 )
Confusional State	9	0.87 ( 0.45 - 1.68 )	0.87 ( 0.17 )	0.87 ( 0.5 )	-0.2 ( -1.11 )
Chills	9	1.08 ( 0.56 - 2.08 )	1.08 ( 0.05 )	1.08 ( 0.62 )	0.11 ( -0.8 )
Flatulence	9	2.4 ( 1.25 - 4.62 )	2.4 ( 7.33 )	2.4 ( 1.39 )	1.26 ( 0.35 )
Urticaria	9	0.79 ( 0.41 - 1.52 )	0.79 ( 0.49 )	0.79 ( 0.46 )	-0.34 ( -1.25 )
Anaemia	9	0.7 ( 0.36 - 1.35 )	0.7 ( 1.14 )	0.7 ( 0.41 )	-0.51 ( -1.42 )
Gastrooesophageal Reflux Disease	9	1.72 ( 0.89 - 3.31 )	1.72 ( 2.7 )	1.72 ( 0.99 )	0.78 ( -0.13 )
Intentional Dose Omission	9	2.83 ( 1.47 - 5.45 )	2.83 ( 10.64 )	2.83 ( 1.64 )	1.5 ( 0.59 )
Migraine	9	1.21 ( 0.63 - 2.33 )	1.21 ( 0.34 )	1.21 ( 0.7 )	0.28 ( -0.63 )
Hypersomnia	9	4.4 ( 2.29 - 8.47 )	4.4 ( 23.61 )	4.39 ( 2.54 )	2.14 ( 1.22 )
Cognitive Disorder	8	2.31 ( 1.16 - 4.63 )	2.31 ( 5.94 )	2.31 ( 1.29 )	1.21 ( 0.24 )
Knee Arthroplasty	8	4.47 ( 2.23 - 8.95 )	4.47 ( 21.51 )	4.46 ( 2.5 )	2.16 ( 1.19 )
Influenza Like Illness	8	1.87 ( 0.93 - 3.74 )	1.87 ( 3.23 )	1.87 ( 1.05 )	0.9 ( -0.06 )
Chest Pain	8	0.74 ( 0.37 - 1.48 )	0.74 ( 0.72 )	0.74 ( 0.41 )	-0.43 ( -1.39 )
Adverse Event	8	1.41 ( 0.7 - 2.82 )	1.41 ( 0.94 )	1.41 ( 0.79 )	0.49 ( -0.47 )
Liver Function Test Abnormal	8	7.26 ( 3.62 - 14.53 )	7.25 ( 43.01 )	7.24 ( 4.05 )	2.86 ( 1.89 )
Accidental Underdose	8	5.18 ( 2.59 - 10.38 )	5.18 ( 26.94 )	5.17 ( 2.89 )	2.37 ( 1.41 )
Stress	8	1.39 ( 0.69 - 2.78 )	1.39 ( 0.87 )	1.39 ( 0.78 )	0.47 ( -0.49 )
Gait Disturbance	8	0.59 ( 0.3 - 1.19 )	0.6 ( 2.2 )	0.6 ( 0.33 )	-0.75 ( -1.71 )
Thirst	7	5.2 ( 2.48 - 10.92 )	5.2 ( 23.7 )	5.19 ( 2.79 )	2.38 ( 1.35 )
Burning Sensation	7	1.58 ( 0.75 - 3.32 )	1.58 ( 1.49 )	1.58 ( 0.85 )	0.66 ( -0.36 )
Drug Intolerance	7	0.73 ( 0.35 - 1.52 )	0.73 ( 0.72 )	0.73 ( 0.39 )	-0.46 ( -1.48 )
Blood Iron Decreased	7	6.52 ( 3.11 - 13.7 )	6.51 ( 32.64 )	6.51 ( 3.5 )	2.7 ( 1.68 )
Loss Of Personal Independence In Daily Activities	7	1.11 ( 0.53 - 2.34 )	1.11 ( 0.08 )	1.11 ( 0.6 )	0.16 ( -0.86 )
Infection	7	0.6 ( 0.28 - 1.25 )	0.6 ( 1.91 )	0.6 ( 0.32 )	-0.74 ( -1.77 )
Blood Cholesterol Increased	7	2.38 ( 1.13 - 4.99 )	2.38 ( 5.58 )	2.37 ( 1.28 )	1.25 ( 0.23 )
Seasonal Allergy	7	5.05 ( 2.41 - 10.61 )	5.05 ( 22.69 )	5.04 ( 2.71 )	2.33 ( 1.31 )
Hepatic Enzyme Abnormal	7	18.29 ( 8.7 - 38.44 )	18.26 ( 113.79 )	18.2 ( 9.77 )	4.19 ( 3.16 )
Faeces Soft	7	8.94 ( 4.26 - 18.78 )	8.93 ( 49.21 )	8.92 ( 4.79 )	3.16 ( 2.13 )
Lacrimation Increased	7	2.97 ( 1.42 - 6.24 )	2.97 ( 9.15 )	2.97 ( 1.6 )	1.57 ( 0.55 )
Nephrolithiasis	7	1.91 ( 0.91 - 4.02 )	1.91 ( 3.05 )	1.91 ( 1.03 )	0.93 ( -0.09 )
Inappropriate Schedule Of Product Administration	7	0.29 ( 0.14 - 0.61 )	0.29 ( 12.19 )	0.29 ( 0.16 )	-1.78 ( -2.8 )
Disturbance In Attention	7	2.02 ( 0.96 - 4.25 )	2.02 ( 3.61 )	2.02 ( 1.09 )	1.01 ( -0.01 )
Emotional Disorder	7	3.69 ( 1.76 - 7.76 )	3.69 ( 13.72 )	3.69 ( 1.98 )	1.88 ( 0.86 )
Arthropathy	6	1.19 ( 0.54 - 2.66 )	1.19 ( 0.19 )	1.19 ( 0.61 )	0.26 ( -0.84 )
Eye Pruritus	6	2.12 ( 0.95 - 4.73 )	2.12 ( 3.57 )	2.12 ( 1.09 )	1.09 ( -0.01 )
Amnesia	6	1.58 ( 0.71 - 3.53 )	1.58 ( 1.29 )	1.58 ( 0.81 )	0.66 ( -0.43 )
Head Discomfort	6	4.07 ( 1.83 - 9.06 )	4.06 ( 13.84 )	4.06 ( 2.08 )	2.02 ( 0.93 )
Urinary Tract Infection	6	0.45 ( 0.2 - 1.01 )	0.45 ( 3.99 )	0.45 ( 0.23 )	-1.14 ( -2.24 )
Hepatotoxicity	6	3.13 ( 1.41 - 6.98 )	3.13 ( 8.69 )	3.13 ( 1.6 )	1.65 ( 0.55 )
Muscle Spasms	6	0.51 ( 0.23 - 1.14 )	0.51 ( 2.8 )	0.51 ( 0.26 )	-0.97 ( -2.06 )
Eyelash Discolouration	6	697.27 ( 295.89 - 1643.13 )	696.39 ( 3634.46 )	607.61 ( 296.57 )	9.25 ( 8.08 )
Blood Glucose Increased	6	0.55 ( 0.25 - 1.22 )	0.55 ( 2.23 )	0.55 ( 0.28 )	-0.87 ( -1.96 )
Insurance Issue	6	3.67 ( 1.65 - 8.18 )	3.67 ( 11.64 )	3.67 ( 1.88 )	1.87 ( 0.78 )
Bilirubin Conjugated Increased	6	54.45 ( 24.34 - 121.82 )	54.38 ( 310.87 )	53.78 ( 27.42 )	5.75 ( 4.65 )
Blood Lactate Dehydrogenase Increased	6	7.16 ( 3.21 - 15.96 )	7.15 ( 31.72 )	7.14 ( 3.65 )	2.84 ( 1.74 )
Gout	6	4.72 ( 2.12 - 10.51 )	4.71 ( 17.53 )	4.71 ( 2.41 )	2.24 ( 1.14 )
Pigmentation Disorder	6	12.53 ( 5.62 - 27.93 )	12.51 ( 63.39 )	12.48 ( 6.38 )	3.64 ( 2.55 )
Sunburn	6	14.12 ( 6.33 - 31.47 )	14.1 ( 72.81 )	14.06 ( 7.19 )	3.81 ( 2.72 )
Neuropathy Peripheral	6	0.76 ( 0.34 - 1.7 )	0.76 ( 0.44 )	0.76 ( 0.39 )	-0.39 ( -1.48 )
Dry Eye	6	1.42 ( 0.64 - 3.17 )	1.42 ( 0.75 )	1.42 ( 0.73 )	0.51 ( -0.59 )
Gastrointestinal Disorder	6	0.82 ( 0.37 - 1.82 )	0.82 ( 0.25 )	0.82 ( 0.42 )	-0.29 ( -1.38 )
Oropharyngeal Pain	6	0.83 ( 0.37 - 1.84 )	0.83 ( 0.22 )	0.83 ( 0.42 )	-0.27 ( -1.37 )
Pneumonia	6	0.25 ( 0.11 - 0.56 )	0.25 ( 13.44 )	0.25 ( 0.13 )	-1.99 ( -3.08 )
Musculoskeletal Stiffness	6	0.82 ( 0.37 - 1.82 )	0.82 ( 0.25 )	0.82 ( 0.42 )	-0.29 ( -1.38 )
Periorbital Oedema	6	18.89 ( 8.47 - 42.14 )	18.87 ( 101.15 )	18.8 ( 9.61 )	4.23 ( 3.14 )
Unevaluable Event	6	1.15 ( 0.52 - 2.56 )	1.15 ( 0.12 )	1.15 ( 0.59 )	0.2 ( -0.89 )
Irritability	6	2 ( 0.9 - 4.46 )	2 ( 3.01 )	2 ( 1.02 )	1 ( -0.09 )
Product Distribution Issue	6	6.4 ( 2.87 - 14.26 )	6.39 ( 27.27 )	6.39 ( 3.27 )	2.68 ( 1.58 )
Eye Irritation	5	1.22 ( 0.51 - 2.94 )	1.22 ( 0.2 )	1.22 ( 0.59 )	0.29 ( -0.89 )
Pollakiuria	5	1.84 ( 0.76 - 4.42 )	1.84 ( 1.9 )	1.84 ( 0.88 )	0.88 ( -0.3 )
Joint Stiffness	5	2.58 ( 1.07 - 6.21 )	2.58 ( 4.84 )	2.58 ( 1.24 )	1.37 ( 0.19 )
Contusion	5	0.73 ( 0.3 - 1.76 )	0.73 ( 0.49 )	0.73 ( 0.35 )	-0.45 ( -1.63 )
Haemoglobin Decreased	5	0.73 ( 0.3 - 1.75 )	0.73 ( 0.51 )	0.73 ( 0.35 )	-0.46 ( -1.64 )
Eye Oedema	5	31.71 ( 13.16 - 76.45 )	31.68 ( 147.59 )	31.48 ( 15.08 )	4.98 ( 3.79 )
Swelling Of Eyelid	5	6.21 ( 2.58 - 14.93 )	6.2 ( 21.8 )	6.2 ( 2.97 )	2.63 ( 1.45 )
Blood Test Abnormal	5	3.69 ( 1.53 - 8.87 )	3.68 ( 9.77 )	3.68 ( 1.77 )	1.88 ( 0.7 )
Tremor	5	0.49 ( 0.2 - 1.18 )	0.49 ( 2.64 )	0.49 ( 0.24 )	-1.03 ( -2.2 )
Pallor	5	2.34 ( 0.97 - 5.62 )	2.34 ( 3.83 )	2.34 ( 1.12 )	1.22 ( 0.05 )
Neuralgia	5	2.52 ( 1.05 - 6.06 )	2.52 ( 4.57 )	2.52 ( 1.21 )	1.33 ( 0.15 )
Neutropenia	5	0.39 ( 0.16 - 0.94 )	0.39 ( 4.73 )	0.39 ( 0.19 )	-1.35 ( -2.53 )
Sleep Disorder	5	0.86 ( 0.36 - 2.06 )	0.86 ( 0.12 )	0.86 ( 0.41 )	-0.22 ( -1.4 )
Death	5	0.07 ( 0.03 - 0.18 )	0.07 ( 58.25 )	0.07 ( 0.04 )	-3.75 ( -4.92 )
Feeling Hot	5	1.2 ( 0.5 - 2.89 )	1.2 ( 0.17 )	1.2 ( 0.58 )	0.26 ( -0.91 )
Myalgia	5	0.48 ( 0.2 - 1.14 )	0.48 ( 2.89 )	0.48 ( 0.23 )	-1.07 ( -2.25 )
Rotator Cuff Syndrome	5	6.32 ( 2.63 - 15.2 )	6.31 ( 22.34 )	6.31 ( 3.03 )	2.66 ( 1.48 )
Arthritis	5	0.78 ( 0.33 - 1.88 )	0.78 ( 0.3 )	0.78 ( 0.38 )	-0.35 ( -1.53 )
Wrong Technique In Product Usage Process	5	0.24 ( 0.1 - 0.57 )	0.24 ( 12.26 )	0.24 ( 0.11 )	-2.07 ( -3.25 )
Dysphagia	5	0.8 ( 0.33 - 1.91 )	0.8 ( 0.26 )	0.8 ( 0.38 )	-0.33 ( -1.51 )
Haematochezia	5	1.04 ( 0.43 - 2.51 )	1.04 ( 0.01 )	1.04 ( 0.5 )	0.06 ( -1.12 )
Hypertransaminasaemia	5	6.77 ( 2.81 - 16.28 )	6.76 ( 24.52 )	6.76 ( 3.24 )	2.76 ( 1.58 )
Rash Macular	5	1.9 ( 0.79 - 4.56 )	1.89 ( 2.11 )	1.89 ( 0.91 )	0.92 ( -0.26 )
Muscular Weakness	5	0.68 ( 0.28 - 1.64 )	0.68 ( 0.73 )	0.68 ( 0.33 )	-0.55 ( -1.73 )
Liver Disorder	4	1.28 ( 0.48 - 3.4 )	1.28 ( 0.24 )	1.28 ( 0.56 )	0.35 ( -0.94 )
Chest Discomfort	4	0.54 ( 0.2 - 1.44 )	0.54 ( 1.55 )	0.54 ( 0.24 )	-0.88 ( -2.17 )
Vertigo	4	1.05 ( 0.39 - 2.79 )	1.05 ( 0.01 )	1.05 ( 0.46 )	0.07 ( -1.22 )
Hot Flush	4	0.74 ( 0.28 - 1.97 )	0.74 ( 0.37 )	0.74 ( 0.33 )	-0.44 ( -1.73 )
Neoplasm Progression	4	1 ( 0.37 - 2.66 )	1 ( 0 )	1 ( 0.44 )	0 ( -1.29 )
Blood Glucose Decreased	4	1.57 ( 0.59 - 4.18 )	1.57 ( 0.82 )	1.57 ( 0.69 )	0.65 ( -0.64 )
Nervousness	4	1.41 ( 0.53 - 3.75 )	1.41 ( 0.47 )	1.41 ( 0.62 )	0.49 ( -0.8 )
Product Availability Issue	4	1.27 ( 0.47 - 3.37 )	1.27 ( 0.22 )	1.26 ( 0.56 )	0.34 ( -0.95 )
Mood Altered	4	2.51 ( 0.94 - 6.7 )	2.51 ( 3.64 )	2.51 ( 1.11 )	1.33 ( 0.04 )
Neoplasm	4	4.31 ( 1.62 - 11.49 )	4.31 ( 10.14 )	4.3 ( 1.89 )	2.11 ( 0.81 )
Sinusitis	4	0.5 ( 0.19 - 1.34 )	0.5 ( 1.96 )	0.5 ( 0.22 )	-0.99 ( -2.28 )
Colitis	4	1.28 ( 0.48 - 3.42 )	1.28 ( 0.25 )	1.28 ( 0.57 )	0.36 ( -0.93 )
Eczema	4	0.9 ( 0.34 - 2.39 )	0.9 ( 0.05 )	0.9 ( 0.4 )	-0.16 ( -1.45 )
Mental Impairment	4	2.52 ( 0.95 - 6.73 )	2.52 ( 3.67 )	2.52 ( 1.11 )	1.33 ( 0.04 )
Neck Pain	4	1.01 ( 0.38 - 2.7 )	1.01 ( 0 )	1.01 ( 0.45 )	0.02 ( -1.27 )
Frequent Bowel Movements	4	1.66 ( 0.62 - 4.42 )	1.66 ( 1.04 )	1.66 ( 0.73 )	0.73 ( -0.56 )
Blood Creatinine Increased	4	0.91 ( 0.34 - 2.44 )	0.91 ( 0.03 )	0.91 ( 0.4 )	-0.13 ( -1.42 )
White Blood Cell Count Abnormal	4	6.53 ( 2.45 - 17.41 )	6.52 ( 18.67 )	6.51 ( 2.87 )	2.7 ( 1.41 )
Product Prescribing Error	4	1.2 ( 0.45 - 3.19 )	1.2 ( 0.13 )	1.2 ( 0.53 )	0.26 ( -1.03 )
Enzyme Level Increased	4	51.35 ( 19.16 - 137.6 )	51.31 ( 195.2 )	50.77 ( 22.25 )	5.67 ( 4.37 )
Bronchitis	4	0.85 ( 0.32 - 2.26 )	0.85 ( 0.11 )	0.85 ( 0.37 )	-0.24 ( -1.53 )
Tumour Excision	4	66.61 ( 24.82 - 178.77 )	66.55 ( 254.72 )	65.65 ( 28.74 )	6.04 ( 4.73 )
Hyperhidrosis	4	0.5 ( 0.19 - 1.33 )	0.5 ( 2 )	0.5 ( 0.22 )	-1 ( -2.29 )
Drug Hypersensitivity	4	0.29 ( 0.11 - 0.77 )	0.29 ( 7 )	0.29 ( 0.13 )	-1.79 ( -3.08 )
Muscle Strain	4	6.35 ( 2.38 - 16.95 )	6.35 ( 18 )	6.34 ( 2.79 )	2.66 ( 1.37 )
Upper Respiratory Tract Infection	4	1.24 ( 0.47 - 3.31 )	1.24 ( 0.19 )	1.24 ( 0.55 )	0.31 ( -0.98 )
Drug Monitoring Procedure Not Performed	4	17.26 ( 6.46 - 46.08 )	17.24 ( 60.98 )	17.18 ( 7.55 )	4.1 ( 2.81 )
Heavy Menstrual Bleeding	4	4.06 ( 1.52 - 10.82 )	4.05 ( 9.2 )	4.05 ( 1.78 )	2.02 ( 0.73 )
Prescribed Underdose	4	2.04 ( 0.77 - 5.45 )	2.04 ( 2.13 )	2.04 ( 0.9 )	1.03 ( -0.26 )
Immune System Disorder	3	2.75 ( 0.89 - 8.52 )	2.75 ( 3.33 )	2.75 ( 1.06 )	1.46 ( 0.01 )
Abdominal Tenderness	3	10.28 ( 3.31 - 31.94 )	10.28 ( 25.07 )	10.26 ( 3.97 )	3.36 ( 1.91 )
Tinnitus	3	1.01 ( 0.32 - 3.12 )	1.01 ( 0 )	1.01 ( 0.39 )	0.01 ( -1.43 )
Renal Impairment	3	0.44 ( 0.14 - 1.36 )	0.44 ( 2.17 )	0.44 ( 0.17 )	-1.19 ( -2.64 )
Muscle Twitching	3	2.09 ( 0.67 - 6.5 )	2.09 ( 1.71 )	2.09 ( 0.81 )	1.07 ( -0.38 )
Haematocrit Decreased	3	2.67 ( 0.86 - 8.3 )	2.67 ( 3.14 )	2.67 ( 1.04 )	1.42 ( -0.03 )
Menstruation Delayed	3	6.23 ( 2.01 - 19.33 )	6.22 ( 13.14 )	6.22 ( 2.41 )	2.64 ( 1.19 )
Red Blood Cell Count Decreased	3	1.3 ( 0.42 - 4.03 )	1.3 ( 0.2 )	1.3 ( 0.5 )	0.38 ( -1.07 )
Dysmenorrhoea	3	3.86 ( 1.24 - 11.99 )	3.86 ( 6.35 )	3.86 ( 1.5 )	1.95 ( 0.5 )
Face Oedema	3	3.01 ( 0.97 - 9.33 )	3.01 ( 4.01 )	3 ( 1.16 )	1.59 ( 0.14 )
Bone Pain	3	0.78 ( 0.25 - 2.41 )	0.78 ( 0.19 )	0.78 ( 0.3 )	-0.36 ( -1.81 )
Limb Discomfort	3	1.11 ( 0.36 - 3.46 )	1.11 ( 0.03 )	1.11 ( 0.43 )	0.16 ( -1.29 )
Lymphadenopathy	3	1.19 ( 0.38 - 3.68 )	1.19 ( 0.09 )	1.19 ( 0.46 )	0.25 ( -1.2 )
Cyst	3	3.22 ( 1.04 - 9.99 )	3.22 ( 4.59 )	3.22 ( 1.25 )	1.69 ( 0.24 )
Body Temperature Increased	3	2 ( 0.65 - 6.21 )	2 ( 1.5 )	2 ( 0.78 )	1 ( -0.44 )
Dysstasia	3	1.42 ( 0.46 - 4.42 )	1.42 ( 0.38 )	1.42 ( 0.55 )	0.51 ( -0.93 )
Tumour Pain	3	26.26 ( 8.44 - 81.7 )	26.24 ( 72.44 )	26.1 ( 10.1 )	4.71 ( 3.26 )
Ill-Defined Disorder	3	0.42 ( 0.13 - 1.29 )	0.42 ( 2.47 )	0.42 ( 0.16 )	-1.27 ( -2.71 )
Ocular Hyperaemia	3	0.85 ( 0.27 - 2.63 )	0.85 ( 0.08 )	0.85 ( 0.33 )	-0.24 ( -1.68 )
Fluid Retention	3	0.86 ( 0.28 - 2.68 )	0.86 ( 0.06 )	0.86 ( 0.34 )	-0.21 ( -1.65 )
Platelet Count Decreased	3	0.35 ( 0.11 - 1.09 )	0.35 ( 3.57 )	0.35 ( 0.14 )	-1.5 ( -2.95 )
Jaundice	3	2.36 ( 0.76 - 7.34 )	2.36 ( 2.36 )	2.36 ( 0.92 )	1.24 ( -0.2 )
Alanine Aminotransferase Abnormal	3	15.44 ( 4.97 - 47.99 )	15.43 ( 40.37 )	15.39 ( 5.96 )	3.94 ( 2.5 )
Procedural Pain	3	1.58 ( 0.51 - 4.89 )	1.58 ( 0.63 )	1.58 ( 0.61 )	0.66 ( -0.79 )
Liver Injury	3	1.38 ( 0.45 - 4.29 )	1.38 ( 0.32 )	1.38 ( 0.54 )	0.47 ( -0.98 )
Hospitalisation	3	0.21 ( 0.07 - 0.66 )	0.21 ( 8.67 )	0.21 ( 0.08 )	-2.22 ( -3.67 )
Diplopia	3	1.77 ( 0.57 - 5.51 )	1.77 ( 1.01 )	1.77 ( 0.69 )	0.83 ( -0.62 )
Hunger	3	3.6 ( 1.16 - 11.17 )	3.6 ( 5.63 )	3.6 ( 1.39 )	1.85 ( 0.4 )
Wrong Dose	3	9.26 ( 2.98 - 28.76 )	9.26 ( 22.06 )	9.24 ( 3.58 )	3.21 ( 1.76 )
Blood Creatine Phosphokinase Increased	3	2.04 ( 0.66 - 6.32 )	2.04 ( 1.59 )	2.04 ( 0.79 )	1.03 ( -0.42 )
Cardiac Disorder	3	0.47 ( 0.15 - 1.44 )	0.47 ( 1.84 )	0.47 ( 0.18 )	-1.1 ( -2.54 )
Discomfort	3	0.53 ( 0.17 - 1.65 )	0.53 ( 1.22 )	0.53 ( 0.21 )	-0.91 ( -2.35 )
Skin Disorder	3	1.09 ( 0.35 - 3.39 )	1.09 ( 0.02 )	1.09 ( 0.42 )	0.13 ( -1.32 )
Hip Arthroplasty	3	2.25 ( 0.73 - 6.99 )	2.25 ( 2.09 )	2.25 ( 0.87 )	1.17 ( -0.27 )
Hepatitis	3	1.74 ( 0.56 - 5.41 )	1.74 ( 0.95 )	1.74 ( 0.68 )	0.8 ( -0.64 )
Therapy Non-Responder	3	0.63 ( 0.2 - 1.96 )	0.63 ( 0.64 )	0.63 ( 0.25 )	-0.66 ( -2.1 )
Herpes Zoster	3	0.65 ( 0.21 - 2.02 )	0.65 ( 0.56 )	0.65 ( 0.25 )	-0.62 ( -2.06 )
Disorientation	3	1.43 ( 0.46 - 4.43 )	1.43 ( 0.38 )	1.43 ( 0.55 )	0.51 ( -0.93 )
Psoriasis	3	0.27 ( 0.09 - 0.84 )	0.27 ( 5.93 )	0.27 ( 0.1 )	-1.89 ( -3.33 )
Skin Irritation	3	0.7 ( 0.22 - 2.16 )	0.7 ( 0.39 )	0.7 ( 0.27 )	-0.52 ( -1.96 )
Prothrombin Time Prolonged	3	15.71 ( 5.06 - 48.83 )	15.71 ( 41.17 )	15.66 ( 6.06 )	3.97 ( 2.52 )
Skin Hypopigmentation	3	20.95 ( 6.74 - 65.13 )	20.93 ( 56.69 )	20.85 ( 8.07 )	4.38 ( 2.93 )
Skin Exfoliation	3	0.43 ( 0.14 - 1.35 )	0.44 ( 2.2 )	0.44 ( 0.17 )	-1.2 ( -2.64 )
Skin Burning Sensation	3	0.53 ( 0.17 - 1.65 )	0.53 ( 1.23 )	0.53 ( 0.21 )	-0.91 ( -2.35 )
Musculoskeletal Discomfort	3	2.32 ( 0.75 - 7.19 )	2.32 ( 2.25 )	2.32 ( 0.9 )	1.21 ( -0.23 )
Metastases To Lung	3	3.39 ( 1.09 - 10.51 )	3.38 ( 5.04 )	3.38 ( 1.31 )	1.76 ( 0.31 )
Product Administration Error	3	1.09 ( 0.35 - 3.38 )	1.09 ( 0.02 )	1.09 ( 0.42 )	0.12 ( -1.32 )
Product Supply Issue	3	3 ( 0.97 - 9.31 )	3 ( 4 )	3 ( 1.16 )	1.58 ( 0.14 )
Toothache	3	2.48 ( 0.8 - 7.69 )	2.48 ( 2.64 )	2.48 ( 0.96 )	1.31 ( -0.14 )
Tongue Discomfort	3	6.88 ( 2.22 - 21.36 )	6.88 ( 15.05 )	6.87 ( 2.66 )	2.78 ( 1.34 )
Energy Increased	3	8.07 ( 2.6 - 25.04 )	8.06 ( 18.53 )	8.05 ( 3.12 )	3.01 ( 1.56 )
Mobility Decreased	3	0.53 ( 0.17 - 1.64 )	0.53 ( 1.25 )	0.53 ( 0.21 )	-0.91 ( -2.36 )
Apathy	3	3.37 ( 1.09 - 10.45 )	3.37 ( 4.99 )	3.37 ( 1.31 )	1.75 ( 0.31 )
Impaired Work Ability	3	2.34 ( 0.75 - 7.27 )	2.34 ( 2.3 )	2.34 ( 0.91 )	1.23 ( -0.22 )
Tooth Infection	3	2.75 ( 0.89 - 8.53 )	2.75 ( 3.33 )	2.75 ( 1.06 )	1.46 ( 0.01 )
Weight Fluctuation	3	2.84 ( 0.92 - 8.82 )	2.84 ( 3.58 )	2.84 ( 1.1 )	1.51 ( 0.06 )
Walking Aid User	2	4.38 ( 1.09 - 17.53 )	4.38 ( 5.21 )	4.38 ( 1.37 )	2.13 ( 0.46 )
Appetite Disorder	2	3.68 ( 0.92 - 14.73 )	3.68 ( 3.9 )	3.68 ( 1.15 )	1.88 ( 0.21 )
Chromaturia	2	1.54 ( 0.38 - 6.14 )	1.53 ( 0.37 )	1.53 ( 0.48 )	0.62 ( -1.05 )
Nervous System Disorder	2	1.47 ( 0.37 - 5.89 )	1.47 ( 0.3 )	1.47 ( 0.46 )	0.56 ( -1.11 )
Flushing	2	0.38 ( 0.09 - 1.51 )	0.38 ( 2.05 )	0.38 ( 0.12 )	-1.4 ( -3.07 )
Gastroenteritis Viral	2	1.55 ( 0.39 - 6.22 )	1.55 ( 0.39 )	1.55 ( 0.49 )	0.64 ( -1.03 )
Menstrual Disorder	2	4.17 ( 1.04 - 16.68 )	4.17 ( 4.81 )	4.16 ( 1.3 )	2.06 ( 0.39 )
Rash Erythematous	2	0.63 ( 0.16 - 2.52 )	0.63 ( 0.44 )	0.63 ( 0.2 )	-0.67 ( -2.33 )
Condition Aggravated	2	0.07 ( 0.02 - 0.28 )	0.07 ( 24.52 )	0.07 ( 0.02 )	-3.82 ( -5.49 )
Lip Swelling	2	0.95 ( 0.24 - 3.8 )	0.95 ( 0.01 )	0.95 ( 0.3 )	-0.08 ( -1.74 )
Hepatitis A	2	36.62 ( 9.11 - 147.25 )	36.6 ( 68.74 )	36.33 ( 11.34 )	5.18 ( 3.51 )
Abnormal Sensation In Eye	2	10.16 ( 2.54 - 40.7 )	10.16 ( 16.48 )	10.14 ( 3.17 )	3.34 ( 1.67 )
Haemorrhage	2	0.28 ( 0.07 - 1.12 )	0.28 ( 3.68 )	0.28 ( 0.09 )	-1.83 ( -3.5 )
Ear Pain	2	1.36 ( 0.34 - 5.45 )	1.36 ( 0.19 )	1.36 ( 0.43 )	0.45 ( -1.22 )
Cholelithiasis	2	1.19 ( 0.3 - 4.75 )	1.19 ( 0.06 )	1.19 ( 0.37 )	0.25 ( -1.42 )
Joint Instability	2	20.17 ( 5.03 - 80.92 )	20.16 ( 36.27 )	20.08 ( 6.28 )	4.33 ( 2.66 )
Oedema	2	0.59 ( 0.15 - 2.37 )	0.59 ( 0.56 )	0.59 ( 0.19 )	-0.75 ( -2.42 )
Liver Function Test Decreased	2	51.47 ( 12.77 - 207.39 )	51.44 ( 97.87 )	50.91 ( 15.86 )	5.67 ( 3.99 )
Abdominal Pain Lower	2	1.32 ( 0.33 - 5.27 )	1.32 ( 0.15 )	1.32 ( 0.41 )	0.4 ( -1.27 )
Staphylococcal Infection	2	1.04 ( 0.26 - 4.18 )	1.04 ( 0 )	1.04 ( 0.33 )	0.06 ( -1.6 )
Candida Infection	2	1.33 ( 0.33 - 5.34 )	1.33 ( 0.17 )	1.33 ( 0.42 )	0.42 ( -1.25 )
Oral Herpes	2	1.19 ( 0.3 - 4.74 )	1.19 ( 0.06 )	1.19 ( 0.37 )	0.25 ( -1.42 )
Investigation Noncompliance	2	206.98 ( 50.23 - 852.92 )	206.9 ( 392.73 )	198.32 ( 60.64 )	7.63 ( 5.92 )
Eye Infection	2	2.08 ( 0.52 - 8.33 )	2.08 ( 1.12 )	2.08 ( 0.65 )	1.06 ( -0.61 )
Eye Inflammation	2	2.25 ( 0.56 - 9.01 )	2.25 ( 1.39 )	2.25 ( 0.71 )	1.17 ( -0.5 )
Fungal Skin Infection	2	6.23 ( 1.56 - 24.96 )	6.23 ( 8.78 )	6.23 ( 1.95 )	2.64 ( 0.97 )
Gait Inability	2	0.5 ( 0.13 - 2.02 )	0.51 ( 0.97 )	0.51 ( 0.16 )	-0.99 ( -2.65 )
Oligomenorrhoea	2	22.62 ( 5.64 - 90.75 )	22.61 ( 41.11 )	22.5 ( 7.04 )	4.49 ( 2.82 )
Inflammation	2	0.43 ( 0.11 - 1.71 )	0.43 ( 1.53 )	0.43 ( 0.13 )	-1.22 ( -2.89 )
Rectal Haemorrhage	2	0.74 ( 0.19 - 2.96 )	0.74 ( 0.18 )	0.74 ( 0.23 )	-0.43 ( -2.1 )
Cardiac Flutter	2	4.6 ( 1.15 - 18.43 )	4.6 ( 5.63 )	4.6 ( 1.44 )	2.2 ( 0.53 )
Hepatic Failure	2	1.18 ( 0.29 - 4.7 )	1.18 ( 0.05 )	1.18 ( 0.37 )	0.23 ( -1.43 )
Renal Disorder	2	0.57 ( 0.14 - 2.29 )	0.57 ( 0.64 )	0.57 ( 0.18 )	-0.81 ( -2.47 )
Tooth Extraction	2	2.63 ( 0.66 - 10.52 )	2.63 ( 2.02 )	2.63 ( 0.82 )	1.39 ( -0.27 )
Sinus Headache	2	7.12 ( 1.78 - 28.51 )	7.12 ( 10.5 )	7.11 ( 2.23 )	2.83 ( 1.16 )
Sciatica	2	1.51 ( 0.38 - 6.06 )	1.51 ( 0.35 )	1.51 ( 0.47 )	0.6 ( -1.07 )
Bronchitis Viral	2	40.69 ( 10.11 - 163.71 )	40.67 ( 76.74 )	40.34 ( 12.58 )	5.33 ( 3.66 )
Optic Neuritis	2	3.75 ( 0.94 - 15.01 )	3.75 ( 4.03 )	3.75 ( 1.17 )	1.91 ( 0.24 )
Hospice Care	2	1.71 ( 0.43 - 6.84 )	1.71 ( 0.59 )	1.71 ( 0.54 )	0.77 ( -0.89 )
Dysuria	2	0.84 ( 0.21 - 3.36 )	0.84 ( 0.06 )	0.84 ( 0.26 )	-0.25 ( -1.92 )
Eating Disorder	2	1.26 ( 0.31 - 5.04 )	1.26 ( 0.11 )	1.26 ( 0.39 )	0.33 ( -1.33 )
Blood Triglycerides Increased	2	2.49 ( 0.62 - 9.97 )	2.49 ( 1.78 )	2.49 ( 0.78 )	1.32 ( -0.35 )
Intraocular Pressure Increased	2	2.51 ( 0.63 - 10.05 )	2.51 ( 1.82 )	2.51 ( 0.79 )	1.33 ( -0.34 )
Loss Of Consciousness	2	0.26 ( 0.06 - 1.03 )	0.26 ( 4.28 )	0.26 ( 0.08 )	-1.96 ( -3.62 )
Cholecystectomy	2	3.11 ( 0.78 - 12.46 )	3.11 ( 2.87 )	3.11 ( 0.97 )	1.64 ( -0.03 )
Hepatic Lesion	2	5.95 ( 1.49 - 23.84 )	5.95 ( 8.23 )	5.95 ( 1.86 )	2.57 ( 0.9 )
Temperature Intolerance	2	2.44 ( 0.61 - 9.78 )	2.44 ( 1.7 )	2.44 ( 0.77 )	1.29 ( -0.38 )
Alanine Aminotransferase Decreased	2	39.34 ( 9.78 - 158.27 )	39.33 ( 74.09 )	39.01 ( 12.17 )	5.29 ( 3.61 )
Furuncle	2	3.6 ( 0.9 - 14.4 )	3.6 ( 3.75 )	3.59 ( 1.13 )	1.85 ( 0.18 )
Incision Site Cellulitis	2	595.08 ( 136.79 - 2588.86 )	594.83 ( 1053.92 )	528.85 ( 154.54 )	9.05 ( 7.25 )
Blood Bilirubin Decreased	2	34.37 ( 8.55 - 138.17 )	34.36 ( 64.31 )	34.12 ( 10.65 )	5.09 ( 3.42 )
Rosacea	2	5.78 ( 1.44 - 23.13 )	5.78 ( 7.89 )	5.77 ( 1.81 )	2.53 ( 0.86 )
Transaminases Increased	2	1.26 ( 0.31 - 5.02 )	1.26 ( 0.1 )	1.26 ( 0.39 )	0.33 ( -1.34 )
Seizure	2	0.18 ( 0.05 - 0.74 )	0.18 ( 7.21 )	0.18 ( 0.06 )	-2.44 ( -4.1 )
Tooth Disorder	2	1.3 ( 0.33 - 5.2 )	1.3 ( 0.14 )	1.3 ( 0.41 )	0.38 ( -1.29 )
Systemic Lupus Erythematosus	2	0.58 ( 0.15 - 2.33 )	0.58 ( 0.6 )	0.58 ( 0.18 )	-0.78 ( -2.44 )
Hair Texture Abnormal	2	2.16 ( 0.54 - 8.64 )	2.16 ( 1.24 )	2.16 ( 0.68 )	1.11 ( -0.56 )
Dermatomyositis	2	8.77 ( 2.19 - 35.14 )	8.77 ( 13.75 )	8.76 ( 2.74 )	3.13 ( 1.46 )
Glomerular Filtration Rate Decreased	2	1.88 ( 0.47 - 7.52 )	1.88 ( 0.82 )	1.88 ( 0.59 )	0.91 ( -0.76 )
Hordeolum	2	4.82 ( 1.2 - 19.28 )	4.82 ( 6.04 )	4.81 ( 1.51 )	2.27 ( 0.6 )
Intervertebral Disc Protrusion	2	1.42 ( 0.36 - 5.7 )	1.42 ( 0.25 )	1.42 ( 0.45 )	0.51 ( -1.16 )
Vaginal Haemorrhage	2	0.92 ( 0.23 - 3.66 )	0.92 ( 0.02 )	0.92 ( 0.29 )	-0.13 ( -1.79 )
Hypoacusis	2	0.46 ( 0.11 - 1.84 )	0.46 ( 1.27 )	0.46 ( 0.14 )	-1.12 ( -2.79 )
Balance Disorder	2	0.35 ( 0.09 - 1.38 )	0.35 ( 2.48 )	0.35 ( 0.11 )	-1.53 ( -3.2 )
Blepharospasm	2	4.57 ( 1.14 - 18.31 )	4.57 ( 5.58 )	4.57 ( 1.43 )	2.19 ( 0.52 )
Gastritis	2	1.25 ( 0.31 - 5.02 )	1.25 ( 0.1 )	1.25 ( 0.39 )	0.33 ( -1.34 )
Blood Calcium Increased	2	4.21 ( 1.05 - 16.87 )	4.21 ( 4.9 )	4.21 ( 1.32 )	2.07 ( 0.41 )
Petechiae	2	3.07 ( 0.77 - 12.28 )	3.07 ( 2.78 )	3.07 ( 0.96 )	1.62 ( -0.05 )
Back Injury	2	2.46 ( 0.62 - 9.85 )	2.46 ( 1.74 )	2.46 ( 0.77 )	1.3 ( -0.37 )
Dermatitis	2	1.27 ( 0.32 - 5.09 )	1.27 ( 0.12 )	1.27 ( 0.4 )	0.35 ( -1.32 )
Skin Reaction	2	2.28 ( 0.57 - 9.14 )	2.28 ( 1.44 )	2.28 ( 0.72 )	1.19 ( -0.48 )
Lymphopenia	2	1.61 ( 0.4 - 6.45 )	1.61 ( 0.46 )	1.61 ( 0.5 )	0.69 ( -0.98 )
Neutrophil Count Decreased	2	0.55 ( 0.14 - 2.21 )	0.55 ( 0.73 )	0.55 ( 0.17 )	-0.86 ( -2.52 )
Epistaxis	2	0.4 ( 0.1 - 1.61 )	0.4 ( 1.76 )	0.4 ( 0.13 )	-1.31 ( -2.97 )
Oral Surgery	2	11.27 ( 2.81 - 45.14 )	11.26 ( 18.66 )	11.24 ( 3.52 )	3.49 ( 1.82 )
Aphonia	2	1.83 ( 0.46 - 7.3 )	1.83 ( 0.75 )	1.83 ( 0.57 )	0.87 ( -0.8 )
Sneezing	2	1.14 ( 0.28 - 4.55 )	1.14 ( 0.03 )	1.14 ( 0.36 )	0.19 ( -1.48 )
Paranasal Sinus Discomfort	2	5.6 ( 1.4 - 22.4 )	5.6 ( 7.54 )	5.59 ( 1.75 )	2.48 ( 0.81 )
Therapeutic Product Effect Incomplete	2	0.18 ( 0.04 - 0.7 )	0.18 ( 7.74 )	0.18 ( 0.06 )	-2.51 ( -4.17 )
Dizziness Postural	2	2.6 ( 0.65 - 10.41 )	2.6 ( 1.97 )	2.6 ( 0.81 )	1.38 ( -0.29 )
Syncope	2	0.31 ( 0.08 - 1.25 )	0.31 ( 3 )	0.31 ( 0.1 )	-1.67 ( -3.34 )
Gastrointestinal Sounds Abnormal	2	5.23 ( 1.31 - 20.95 )	5.23 ( 6.84 )	5.23 ( 1.64 )	2.39 ( 0.72 )
Muscle Tightness	2	2 ( 0.5 - 8.01 )	2 ( 1 )	2 ( 0.63 )	1 ( -0.67 )
Increased Appetite	2	1.69 ( 0.42 - 6.74 )	1.68 ( 0.56 )	1.68 ( 0.53 )	0.75 ( -0.91 )
Vitamin D Decreased	2	3.32 ( 0.83 - 13.29 )	3.32 ( 3.24 )	3.32 ( 1.04 )	1.73 ( 0.06 )
Hypogeusia	2	16.85 ( 4.2 - 67.57 )	16.84 ( 29.7 )	16.79 ( 5.25 )	4.07 ( 2.4 )
Mediastinal Mass	2	75.57 ( 18.69 - 305.57 )	75.53 ( 144.8 )	74.37 ( 23.1 )	6.22 ( 4.53 )
Splenic Rupture	2	19.96 ( 4.98 - 80.07 )	19.95 ( 35.86 )	19.87 ( 6.22 )	4.31 ( 2.64 )
Haemorrhagic Ascites	2	144.26 ( 35.32 - 589.15 )	144.2 ( 276.05 )	139.99 ( 43.13 )	7.13 ( 5.43 )
Metastases To Central Nervous System	2	1.99 ( 0.5 - 7.97 )	1.99 ( 0.99 )	1.99 ( 0.62 )	0.99 ( -0.67 )
Underdose	2	0.4 ( 0.1 - 1.6 )	0.4 ( 1.81 )	0.4 ( 0.13 )	-1.32 ( -2.99 )
Ankle Fracture	2	1.77 ( 0.44 - 7.08 )	1.77 ( 0.67 )	1.77 ( 0.55 )	0.82 ( -0.84 )
Emotional Distress	2	0.12 ( 0.03 - 0.49 )	0.12 ( 12.59 )	0.12 ( 0.04 )	-3.03 ( -4.69 )
Eyelid Disorder	2	13.5 ( 3.37 - 54.12 )	13.5 ( 23.08 )	13.46 ( 4.21 )	3.75 ( 2.08 )
Heart Rate Increased	2	0.28 ( 0.07 - 1.13 )	0.28 ( 3.62 )	0.28 ( 0.09 )	-1.82 ( -3.48 )
Mood Swings	2	1.25 ( 0.31 - 5 )	1.25 ( 0.1 )	1.25 ( 0.39 )	0.32 ( -1.34 )
Fungal Infection	2	0.82 ( 0.2 - 3.26 )	0.82 ( 0.08 )	0.82 ( 0.26 )	-0.29 ( -1.96 )
Crying	2	1.08 ( 0.27 - 4.3 )	1.08 ( 0.01 )	1.08 ( 0.34 )	0.1 ( -1.56 )
Ovarian Cyst	2	3.62 ( 0.9 - 14.47 )	3.62 ( 3.78 )	3.61 ( 1.13 )	1.85 ( 0.19 )
Social Problem	2	10.99 ( 2.74 - 44.04 )	10.99 ( 18.12 )	10.97 ( 3.43 )	3.46 ( 1.79 )
Blood Cholesterol Abnormal	2	5.9 ( 1.47 - 23.6 )	5.89 ( 8.12 )	5.89 ( 1.84 )	2.56 ( 0.89 )
Oedema Peripheral	2	0.34 ( 0.08 - 1.34 )	0.34 ( 2.62 )	0.34 ( 0.11 )	-1.57 ( -3.24 )
Euphoric Mood	2	3.39 ( 0.85 - 13.58 )	3.39 ( 3.37 )	3.39 ( 1.06 )	1.76 ( 0.09 )
Intentional Product Use Issue	2	0.17 ( 0.04 - 0.68 )	0.17 ( 8.05 )	0.17 ( 0.05 )	-2.55 ( -4.21 )
Eye Disorder	2	0.81 ( 0.2 - 3.25 )	0.81 ( 0.09 )	0.81 ( 0.25 )	-0.3 ( -1.97 )
Endodontic Procedure	2	12.59 ( 3.14 - 50.46 )	12.59 ( 21.28 )	12.56 ( 3.93 )	3.65 ( 1.98 )
Drug-Induced Liver Injury	2	0.71 ( 0.18 - 2.82 )	0.71 ( 0.24 )	0.71 ( 0.22 )	-0.5 ( -2.17 )
Sjogren'S Syndrome	2	4.79 ( 1.2 - 19.17 )	4.79 ( 5.99 )	4.78 ( 1.5 )	2.26 ( 0.59 )
Animal Bite	1	4.96 ( 0.7 - 35.28 )	4.96 ( 3.16 )	4.96 ( 0.96 )	2.31 ( 0.27 )
Hiccups	1	1.91 ( 0.27 - 13.53 )	1.9 ( 0.43 )	1.9 ( 0.37 )	0.93 ( -1.11 )
Vitreous Floaters	1	1.27 ( 0.18 - 9.03 )	1.27 ( 0.06 )	1.27 ( 0.25 )	0.35 ( -1.7 )
Glassy Eyes	1	20.6 ( 2.89 - 146.93 )	20.6 ( 18.57 )	20.52 ( 3.96 )	4.36 ( 2.31 )
Libido Decreased	1	1.52 ( 0.21 - 10.77 )	1.52 ( 0.18 )	1.52 ( 0.29 )	0.6 ( -1.44 )
Thyroid Disorder	1	0.84 ( 0.12 - 5.95 )	0.84 ( 0.03 )	0.84 ( 0.16 )	-0.25 ( -2.3 )
Facial Paralysis	1	1.21 ( 0.17 - 8.58 )	1.21 ( 0.04 )	1.21 ( 0.23 )	0.27 ( -1.77 )
Parasitic Gastroenteritis	1	54.09 ( 7.53 - 388.35 )	54.08 ( 51.51 )	53.48 ( 10.28 )	5.74 ( 3.68 )
Peripheral Coldness	1	1.09 ( 0.15 - 7.74 )	1.09 ( 0.01 )	1.09 ( 0.21 )	0.12 ( -1.92 )
Tenderness	1	1.35 ( 0.19 - 9.6 )	1.35 ( 0.09 )	1.35 ( 0.26 )	0.43 ( -1.61 )
Hair Growth Abnormal	1	2.48 ( 0.35 - 17.61 )	2.48 ( 0.88 )	2.48 ( 0.48 )	1.31 ( -0.73 )
Hypoglycaemia	1	0.37 ( 0.05 - 2.64 )	0.37 ( 1.06 )	0.37 ( 0.07 )	-1.43 ( -3.47 )
Incoherent	1	3.28 ( 0.46 - 23.31 )	3.28 ( 1.58 )	3.28 ( 0.64 )	1.71 ( -0.33 )
Rash Vesicular	1	2.91 ( 0.41 - 20.64 )	2.91 ( 1.25 )	2.9 ( 0.56 )	1.54 ( -0.5 )
Vomiting Projectile	1	5.53 ( 0.78 - 39.3 )	5.53 ( 3.7 )	5.52 ( 1.07 )	2.47 ( 0.42 )
Breast Pain	1	1.7 ( 0.24 - 12.1 )	1.7 ( 0.29 )	1.7 ( 0.33 )	0.77 ( -1.27 )
Quality Of Life Decreased	1	1.08 ( 0.15 - 7.68 )	1.08 ( 0.01 )	1.08 ( 0.21 )	0.11 ( -1.93 )
Knee Deformity	1	7.2 ( 1.01 - 51.2 )	7.2 ( 5.33 )	7.19 ( 1.39 )	2.85 ( 0.8 )
Musculoskeletal Chest Pain	1	0.92 ( 0.13 - 6.55 )	0.92 ( 0.01 )	0.92 ( 0.18 )	-0.12 ( -2.16 )
Dermatitis Contact	1	1.29 ( 0.18 - 9.14 )	1.29 ( 0.06 )	1.29 ( 0.25 )	0.36 ( -1.68 )
Hypokinesia	1	0.93 ( 0.13 - 6.62 )	0.93 ( 0 )	0.93 ( 0.18 )	-0.1 ( -2.14 )
Chronic Obstructive Pulmonary Disease	1	0.31 ( 0.04 - 2.19 )	0.31 ( 1.55 )	0.31 ( 0.06 )	-1.7 ( -3.74 )
Micturition Urgency	1	1.3 ( 0.18 - 9.22 )	1.3 ( 0.07 )	1.3 ( 0.25 )	0.38 ( -1.67 )
Rales	1	2.18 ( 0.31 - 15.48 )	2.18 ( 0.64 )	2.18 ( 0.42 )	1.12 ( -0.92 )
Tumour Invasion	1	33.05 ( 4.62 - 236.3 )	33.05 ( 30.86 )	32.83 ( 6.33 )	5.04 ( 2.98 )
Bone Erosion	1	2.9 ( 0.41 - 20.58 )	2.9 ( 1.24 )	2.9 ( 0.56 )	1.53 ( -0.51 )
Limb Mass	1	4.1 ( 0.58 - 29.13 )	4.1 ( 2.34 )	4.1 ( 0.79 )	2.03 ( -0.01 )
Skin Warm	1	2.65 ( 0.37 - 18.85 )	2.65 ( 1.03 )	2.65 ( 0.51 )	1.41 ( -0.63 )
Carpal Tunnel Syndrome	1	0.96 ( 0.14 - 6.85 )	0.96 ( 0 )	0.96 ( 0.19 )	-0.05 ( -2.09 )
Sensory Disturbance	1	1.21 ( 0.17 - 8.57 )	1.21 ( 0.04 )	1.21 ( 0.23 )	0.27 ( -1.77 )
Skin Wrinkling	1	4.9 ( 0.69 - 34.84 )	4.9 ( 3.1 )	4.9 ( 0.95 )	2.29 ( 0.25 )
Adrenal Insufficiency	1	0.88 ( 0.12 - 6.27 )	0.88 ( 0.02 )	0.88 ( 0.17 )	-0.18 ( -2.22 )
Bedridden	1	1.13 ( 0.16 - 8.02 )	1.13 ( 0.01 )	1.13 ( 0.22 )	0.17 ( -1.87 )
Electrolyte Imbalance	1	1.17 ( 0.16 - 8.32 )	1.17 ( 0.02 )	1.17 ( 0.23 )	0.23 ( -1.81 )
Hypopituitarism	1	5.73 ( 0.81 - 40.72 )	5.73 ( 3.9 )	5.72 ( 1.11 )	2.52 ( 0.47 )
Hypothyroidism	1	0.39 ( 0.06 - 2.78 )	0.39 ( 0.95 )	0.39 ( 0.08 )	-1.35 ( -3.39 )
Lagophthalmos	1	44.48 ( 6.21 - 318.76 )	44.47 ( 42.1 )	44.07 ( 8.48 )	5.46 ( 3.4 )
Eructation	1	0.84 ( 0.12 - 5.95 )	0.84 ( 0.03 )	0.84 ( 0.16 )	-0.26 ( -2.3 )
Gastrointestinal Pain	1	1.22 ( 0.17 - 8.69 )	1.22 ( 0.04 )	1.22 ( 0.24 )	0.29 ( -1.75 )
Limb Injury	1	0.42 ( 0.06 - 2.95 )	0.42 ( 0.82 )	0.42 ( 0.08 )	-1.27 ( -3.31 )
Nerve Injury	1	1.24 ( 0.17 - 8.81 )	1.24 ( 0.05 )	1.24 ( 0.24 )	0.31 ( -1.73 )
Hyperlipidaemia	1	2.04 ( 0.29 - 14.47 )	2.04 ( 0.53 )	2.04 ( 0.39 )	1.03 ( -1.02 )
Blood Potassium Increased	1	1 ( 0.14 - 7.09 )	1 ( 0 )	1 ( 0.19 )	0 ( -2.04 )
Bone Disorder	1	0.99 ( 0.14 - 7.06 )	0.99 ( 0 )	0.99 ( 0.19 )	-0.01 ( -2.05 )
Retching	1	0.73 ( 0.1 - 5.21 )	0.73 ( 0.1 )	0.73 ( 0.14 )	-0.45 ( -2.49 )
Palpitations	1	0.13 ( 0.02 - 0.94 )	0.13 ( 5.65 )	0.13 ( 0.03 )	-2.91 ( -4.95 )
Accidental Exposure To Product	1	0.09 ( 0.01 - 0.66 )	0.09 ( 8.78 )	0.09 ( 0.02 )	-3.41 ( -5.46 )
Hyperthyroidism	1	0.95 ( 0.13 - 6.72 )	0.95 ( 0 )	0.95 ( 0.18 )	-0.08 ( -2.12 )
Incision Site Vesicles	1	339.97 ( 44.7 - 2585.98 )	339.9 ( 315.38 )	317.31 ( 58.1 )	8.31 ( 6.15 )
Incision Site Impaired Healing	1	18.59 ( 2.61 - 132.52 )	18.59 ( 16.58 )	18.52 ( 3.58 )	4.21 ( 2.16 )
Skin Texture Abnormal	1	10.6 ( 1.49 - 75.44 )	10.6 ( 8.67 )	10.58 ( 2.05 )	3.4 ( 1.36 )
Therapeutic Response Decreased	1	0.24 ( 0.03 - 1.71 )	0.24 ( 2.39 )	0.24 ( 0.05 )	-2.05 ( -4.09 )
Blood Disorder	1	1.72 ( 0.24 - 12.25 )	1.72 ( 0.3 )	1.72 ( 0.33 )	0.79 ( -1.26 )
Sensitivity To Weather Change	1	1.59 ( 0.22 - 11.27 )	1.59 ( 0.22 )	1.59 ( 0.31 )	0.67 ( -1.38 )
Papilloedema	1	3.68 ( 0.52 - 26.18 )	3.68 ( 1.95 )	3.68 ( 0.71 )	1.88 ( -0.16 )
Tanning	1	83.5 ( 11.56 - 603.17 )	83.48 ( 80.09 )	82.06 ( 15.69 )	6.36 ( 4.28 )
Testicular Atrophy	1	17.63 ( 2.47 - 125.63 )	17.62 ( 15.62 )	17.56 ( 3.4 )	4.13 ( 2.09 )
Movement Disorder	1	0.47 ( 0.07 - 3.36 )	0.47 ( 0.58 )	0.47 ( 0.09 )	-1.08 ( -3.12 )
Renal Function Test Abnormal	1	2.58 ( 0.36 - 18.31 )	2.58 ( 0.96 )	2.58 ( 0.5 )	1.36 ( -0.68 )
Aspartate Aminotransferase Abnormal	1	8.77 ( 1.23 - 62.35 )	8.76 ( 6.87 )	8.75 ( 1.69 )	3.13 ( 1.08 )
Gamma-Glutamyltransferase	1	153.54 ( 20.95 - 1124.96 )	153.5 ( 146.78 )	148.74 ( 28.1 )	7.22 ( 5.12 )
Blood Testosterone Decreased	1	4.4 ( 0.62 - 31.29 )	4.4 ( 2.63 )	4.4 ( 0.85 )	2.14 ( 0.09 )
Hip Surgery	1	2.05 ( 0.29 - 14.58 )	2.05 ( 0.54 )	2.05 ( 0.4 )	1.04 ( -1 )
Lumbar Puncture	1	33.52 ( 4.69 - 239.65 )	33.51 ( 31.32 )	33.28 ( 6.42 )	5.06 ( 3 )
Stent Placement	1	2.43 ( 0.34 - 17.26 )	2.43 ( 0.84 )	2.43 ( 0.47 )	1.28 ( -0.76 )
Urine Odour Abnormal	1	2.59 ( 0.36 - 18.42 )	2.59 ( 0.98 )	2.59 ( 0.5 )	1.37 ( -0.67 )
Blood Sodium Abnormal	1	11.78 ( 1.66 - 83.86 )	11.78 ( 9.84 )	11.75 ( 2.27 )	3.55 ( 1.51 )
Hypotension	1	0.07 ( 0.01 - 0.5 )	0.07 ( 12.2 )	0.07 ( 0.01 )	-3.82 ( -5.86 )
Skin Turgor Decreased	1	48.57 ( 6.77 - 348.32 )	48.56 ( 46.11 )	48.08 ( 9.25 )	5.59 ( 3.53 )
Stomatitis	1	0.2 ( 0.03 - 1.45 )	0.2 ( 3.11 )	0.2 ( 0.04 )	-2.29 ( -4.33 )
Hepatic Mass	1	6.18 ( 0.87 - 43.95 )	6.18 ( 4.34 )	6.17 ( 1.2 )	2.63 ( 0.58 )
Pneumonia Mycoplasmal	1	19.43 ( 2.72 - 138.5 )	19.42 ( 17.4 )	19.35 ( 3.74 )	4.27 ( 2.23 )
Autoimmune Thyroiditis	1	3.37 ( 0.47 - 23.92 )	3.37 ( 1.66 )	3.36 ( 0.65 )	1.75 ( -0.29 )
Blood Chloride Increased	1	10.3 ( 1.45 - 73.31 )	10.3 ( 8.38 )	10.28 ( 1.99 )	3.36 ( 1.32 )
Hyperproteinaemia	1	58.04 ( 8.08 - 417.1 )	58.03 ( 55.37 )	57.34 ( 11.01 )	5.84 ( 3.78 )
Hypertensive Crisis	1	1.41 ( 0.2 - 10 )	1.41 ( 0.12 )	1.41 ( 0.27 )	0.49 ( -1.55 )
Thyroid Hormones Increased	1	9 ( 1.26 - 64.01 )	9 ( 7.09 )	8.98 ( 1.74 )	3.17 ( 1.12 )
Heart Rate Irregular	1	0.66 ( 0.09 - 4.71 )	0.66 ( 0.17 )	0.66 ( 0.13 )	-0.59 ( -2.63 )
Tachycardia	1	0.16 ( 0.02 - 1.16 )	0.16 ( 4.3 )	0.16 ( 0.03 )	-2.62 ( -4.66 )
Accident	1	1.04 ( 0.15 - 7.4 )	1.04 ( 0 )	1.04 ( 0.2 )	0.06 ( -1.98 )
Injection Site Pruritus	1	0.28 ( 0.04 - 1.95 )	0.28 ( 1.91 )	0.28 ( 0.05 )	-1.86 ( -3.9 )
Incision Site Haemorrhage	1	25.18 ( 3.53 - 179.75 )	25.18 ( 23.1 )	25.05 ( 4.84 )	4.65 ( 2.6 )
Micturition Disorder	1	4.3 ( 0.61 - 30.58 )	4.3 ( 2.53 )	4.3 ( 0.83 )	2.1 ( 0.06 )
Morning Sickness	1	12.69 ( 1.78 - 90.36 )	12.69 ( 10.74 )	12.66 ( 2.45 )	3.66 ( 1.62 )
Exposure To Sars-Cov-2	1	2.91 ( 0.41 - 20.67 )	2.91 ( 1.25 )	2.91 ( 0.56 )	1.54 ( -0.5 )
Scar	1	0.89 ( 0.13 - 6.34 )	0.89 ( 0.01 )	0.89 ( 0.17 )	-0.16 ( -2.2 )
Yawning	1	5.44 ( 0.77 - 38.67 )	5.44 ( 3.62 )	5.43 ( 1.05 )	2.44 ( 0.4 )
Muscle Fatigue	1	3.32 ( 0.47 - 23.58 )	3.32 ( 1.62 )	3.32 ( 0.64 )	1.73 ( -0.31 )
Muscle Strength Abnormal	1	14.78 ( 2.08 - 105.28 )	14.78 ( 12.81 )	14.74 ( 2.85 )	3.88 ( 1.83 )
Rhabdomyolysis	1	0.42 ( 0.06 - 2.97 )	0.42 ( 0.81 )	0.42 ( 0.08 )	-1.26 ( -3.3 )
Cerebral Disorder	1	1.38 ( 0.19 - 9.81 )	1.38 ( 0.11 )	1.38 ( 0.27 )	0.47 ( -1.57 )
Oral Pain	1	0.63 ( 0.09 - 4.49 )	0.63 ( 0.21 )	0.63 ( 0.12 )	-0.66 ( -2.7 )
Myelosuppression	1	0.25 ( 0.03 - 1.74 )	0.25 ( 2.32 )	0.25 ( 0.05 )	-2.03 ( -4.07 )
Blood Pressure Decreased	1	0.22 ( 0.03 - 1.57 )	0.22 ( 2.74 )	0.22 ( 0.04 )	-2.18 ( -4.22 )
Febrile Neutropenia	1	0.18 ( 0.03 - 1.27 )	0.18 ( 3.75 )	0.18 ( 0.03 )	-2.48 ( -4.52 )
Road Traffic Accident	1	0.37 ( 0.05 - 2.63 )	0.37 ( 1.07 )	0.37 ( 0.07 )	-1.43 ( -3.48 )
Product Communication Issue	1	0.85 ( 0.12 - 6.03 )	0.85 ( 0.03 )	0.85 ( 0.16 )	-0.24 ( -2.28 )
Urinary Retention	1	0.45 ( 0.06 - 3.18 )	0.45 ( 0.68 )	0.45 ( 0.09 )	-1.16 ( -3.2 )
Aspartate Aminotransferase Decreased	1	26.44 ( 3.7 - 188.78 )	26.44 ( 24.34 )	26.3 ( 5.08 )	4.72 ( 2.66 )
Bowel Movement Irregularity	1	1.44 ( 0.2 - 10.22 )	1.44 ( 0.13 )	1.44 ( 0.28 )	0.52 ( -1.52 )
Tumour Inflammation	1	73.22 ( 10.16 - 527.82 )	73.21 ( 70.14 )	72.12 ( 13.81 )	6.17 ( 4.1 )
Odynophagia	1	2.5 ( 0.35 - 17.76 )	2.5 ( 0.9 )	2.5 ( 0.48 )	1.32 ( -0.72 )
Pancreatic Carcinoma	1	0.25 ( 0.03 - 1.75 )	0.25 ( 2.3 )	0.25 ( 0.05 )	-2.02 ( -4.06 )
Drain Site Complication	1	97.14 ( 13.41 - 703.6 )	97.11 ( 93.22 )	95.19 ( 18.16 )	6.57 ( 4.49 )
Stress Fracture	1	3.61 ( 0.51 - 25.66 )	3.61 ( 1.89 )	3.61 ( 0.7 )	1.85 ( -0.19 )
Dyslexia	1	9.63 ( 1.35 - 68.55 )	9.63 ( 7.72 )	9.62 ( 1.86 )	3.27 ( 1.22 )
Adrenal Neoplasm	1	36.9 ( 5.16 - 263.99 )	36.89 ( 34.65 )	36.61 ( 7.06 )	5.19 ( 3.14 )
Drug Interaction	1	0.09 ( 0.01 - 0.66 )	0.09 ( 8.89 )	0.09 ( 0.02 )	-3.43 ( -5.47 )
Pharyngitis	1	1.14 ( 0.16 - 8.08 )	1.14 ( 0.02 )	1.14 ( 0.22 )	0.19 ( -1.86 )
Eye Pain	1	0.23 ( 0.03 - 1.65 )	0.23 ( 2.52 )	0.23 ( 0.05 )	-2.1 ( -4.14 )
Choking Sensation	1	3.05 ( 0.43 - 21.69 )	3.05 ( 1.38 )	3.05 ( 0.59 )	1.61 ( -0.43 )
Dysphonia	1	0.23 ( 0.03 - 1.65 )	0.23 ( 2.53 )	0.23 ( 0.05 )	-2.1 ( -4.14 )
Haemorrhoids	1	0.86 ( 0.12 - 6.12 )	0.86 ( 0.02 )	0.86 ( 0.17 )	-0.22 ( -2.26 )
Blood Calcium Decreased	1	1.26 ( 0.18 - 8.96 )	1.26 ( 0.05 )	1.26 ( 0.24 )	0.33 ( -1.71 )
Hand Dermatitis	1	14.12 ( 1.98 - 100.58 )	14.12 ( 12.16 )	14.08 ( 2.72 )	3.82 ( 1.77 )
Platelet Count Abnormal	1	1.88 ( 0.26 - 13.35 )	1.88 ( 0.41 )	1.88 ( 0.36 )	0.91 ( -1.13 )
Device Dislocation	1	0.34 ( 0.05 - 2.42 )	0.34 ( 1.27 )	0.34 ( 0.07 )	-1.55 ( -3.59 )
Magnetic Resonance Imaging Abnormal	1	4.95 ( 0.7 - 35.17 )	4.95 ( 3.15 )	4.94 ( 0.96 )	2.31 ( 0.26 )
Vitamin B12 Deficiency	1	3.37 ( 0.47 - 23.97 )	3.37 ( 1.67 )	3.37 ( 0.65 )	1.75 ( -0.29 )
Mixed Connective Tissue Disease	1	31.73 ( 4.44 - 226.79 )	31.72 ( 29.56 )	31.52 ( 6.08 )	4.98 ( 2.92 )
Impaired Healing	1	0.44 ( 0.06 - 3.13 )	0.44 ( 0.71 )	0.44 ( 0.09 )	-1.18 ( -3.22 )
Haemorrhagic Diathesis	1	4.52 ( 0.64 - 32.16 )	4.52 ( 2.74 )	4.52 ( 0.88 )	2.18 ( 0.13 )
Rheumatic Disorder	1	5.31 ( 0.75 - 37.76 )	5.31 ( 3.5 )	5.31 ( 1.03 )	2.41 ( 0.36 )
Inability To Afford Medication	1	0.87 ( 0.12 - 6.2 )	0.87 ( 0.02 )	0.87 ( 0.17 )	-0.2 ( -2.24 )
Blood Lactic Acid Increased	1	2.51 ( 0.35 - 17.84 )	2.51 ( 0.91 )	2.51 ( 0.49 )	1.33 ( -0.71 )
Vitiligo	1	4.82 ( 0.68 - 34.27 )	4.82 ( 3.03 )	4.82 ( 0.93 )	2.27 ( 0.23 )
Poor Venous Access	1	0.91 ( 0.13 - 6.43 )	0.91 ( 0.01 )	0.91 ( 0.18 )	-0.14 ( -2.18 )
Viral Pharyngitis	1	33.28 ( 4.66 - 237.96 )	33.28 ( 31.09 )	33.05 ( 6.37 )	5.05 ( 2.99 )
Oral Mucosal Eruption	1	8.12 ( 1.14 - 57.77 )	8.12 ( 6.23 )	8.11 ( 1.57 )	3.02 ( 0.98 )
Behcet'S Syndrome	1	7.19 ( 1.01 - 51.13 )	7.19 ( 5.32 )	7.18 ( 1.39 )	2.84 ( 0.8 )
Vulvovaginal Rash	1	31.31 ( 4.38 - 223.78 )	31.31 ( 29.15 )	31.11 ( 6 )	4.96 ( 2.91 )
Nail Disorder	1	1.54 ( 0.22 - 10.96 )	1.54 ( 0.19 )	1.54 ( 0.3 )	0.63 ( -1.42 )
Nail Cuticle Fissure	1	139.99 ( 19.16 - 1022.89 )	139.96 ( 134.03 )	135.99 ( 25.75 )	7.09 ( 4.99 )
Vulvovaginal Pain	1	2.74 ( 0.39 - 19.44 )	2.74 ( 1.1 )	2.74 ( 0.53 )	1.45 ( -0.59 )
Anal Pruritus	1	16.53 ( 2.32 - 117.75 )	16.52 ( 14.53 )	16.47 ( 3.19 )	4.04 ( 1.99 )
Proctalgia	1	2.25 ( 0.32 - 16.01 )	2.25 ( 0.7 )	2.25 ( 0.44 )	1.17 ( -0.87 )
Vulval Ulceration	1	44.9 ( 6.27 - 321.79 )	44.89 ( 42.51 )	44.48 ( 8.56 )	5.48 ( 3.42 )
Poor Quality Sleep	1	0.61 ( 0.09 - 4.33 )	0.61 ( 0.25 )	0.61 ( 0.12 )	-0.71 ( -2.75 )
Vulvovaginal Inflammation	1	18.74 ( 2.63 - 133.57 )	18.73 ( 16.72 )	18.67 ( 3.61 )	4.22 ( 2.17 )
Mouth Ulceration	1	0.64 ( 0.09 - 4.53 )	0.64 ( 0.21 )	0.64 ( 0.12 )	-0.65 ( -2.69 )
Skin Lesion	1	0.47 ( 0.07 - 3.33 )	0.47 ( 0.6 )	0.47 ( 0.09 )	-1.09 ( -3.13 )
Scratch	1	1.16 ( 0.16 - 8.21 )	1.16 ( 0.02 )	1.16 ( 0.22 )	0.21 ( -1.83 )
Osteoarthritis	1	0.31 ( 0.04 - 2.2 )	0.31 ( 1.54 )	0.31 ( 0.06 )	-1.69 ( -3.73 )
Osteosarcoma	1	31.73 ( 4.44 - 226.79 )	31.72 ( 29.56 )	31.52 ( 6.08 )	4.98 ( 2.92 )
Asthenopia	1	2.83 ( 0.4 - 20.13 )	2.83 ( 1.18 )	2.83 ( 0.55 )	1.5 ( -0.54 )
Osteonecrosis	1	0.32 ( 0.05 - 2.3 )	0.32 ( 1.41 )	0.32 ( 0.06 )	-1.62 ( -3.66 )
Night Sweats	1	0.43 ( 0.06 - 3.07 )	0.43 ( 0.75 )	0.43 ( 0.08 )	-1.21 ( -3.25 )
Cold Urticaria	1	34.49 ( 4.82 - 246.65 )	34.48 ( 32.28 )	34.24 ( 6.6 )	5.1 ( 3.04 )
Chalazion	1	16.3 ( 2.29 - 116.13 )	16.3 ( 14.31 )	16.24 ( 3.14 )	4.02 ( 1.97 )
Oropharyngeal Discomfort	1	0.98 ( 0.14 - 6.98 )	0.98 ( 0 )	0.98 ( 0.19 )	-0.02 ( -2.07 )
Norovirus Infection	1	8.09 ( 1.14 - 57.57 )	8.09 ( 6.21 )	8.08 ( 1.57 )	3.01 ( 0.97 )
Spinal Stenosis	1	1.6 ( 0.22 - 11.35 )	1.6 ( 0.22 )	1.6 ( 0.31 )	0.68 ( -1.37 )
Joint Arthroplasty	1	7.51 ( 1.06 - 53.39 )	7.51 ( 5.63 )	7.5 ( 1.45 )	2.91 ( 0.86 )
Blood Oestrogen Decreased	1	21.06 ( 2.95 - 150.19 )	21.06 ( 19.02 )	20.97 ( 4.05 )	4.39 ( 2.34 )
Skin Fissures	1	0.58 ( 0.08 - 4.12 )	0.58 ( 0.3 )	0.58 ( 0.11 )	-0.79 ( -2.83 )
Menstruation Irregular	1	1.29 ( 0.18 - 9.17 )	1.29 ( 0.07 )	1.29 ( 0.25 )	0.37 ( -1.67 )
Skin Haemorrhage	1	0.79 ( 0.11 - 5.6 )	0.79 ( 0.06 )	0.79 ( 0.15 )	-0.34 ( -2.38 )
Urge Incontinence	1	17.18 ( 2.41 - 122.44 )	17.18 ( 15.18 )	17.12 ( 3.31 )	4.1 ( 2.05 )
Pelvic Mass	1	19.43 ( 2.72 - 138.5 )	19.42 ( 17.4 )	19.35 ( 3.74 )	4.27 ( 2.23 )
Blood Pressure Abnormal	1	0.58 ( 0.08 - 4.14 )	0.58 ( 0.3 )	0.58 ( 0.11 )	-0.78 ( -2.82 )
Loss Of Therapeutic Response	1	2.63 ( 0.37 - 18.68 )	2.63 ( 1.01 )	2.63 ( 0.51 )	1.39 ( -0.65 )
Acne Cystic	1	3.52 ( 0.49 - 24.98 )	3.51 ( 1.8 )	3.51 ( 0.68 )	1.81 ( -0.23 )
Overdose	1	0.04 ( 0.01 - 0.32 )	0.04 ( 20.52 )	0.04 ( 0.01 )	-4.48 ( -6.52 )
Breast Disorder	1	7.06 ( 0.99 - 50.22 )	7.06 ( 5.19 )	7.05 ( 1.37 )	2.82 ( 0.77 )
Hypocalcaemia	1	0.75 ( 0.1 - 5.29 )	0.75 ( 0.09 )	0.75 ( 0.14 )	-0.42 ( -2.46 )
Splenomegaly	1	1.2 ( 0.17 - 8.52 )	1.2 ( 0.03 )	1.2 ( 0.23 )	0.26 ( -1.78 )
Bacterial Test Positive	1	5.38 ( 0.76 - 38.27 )	5.38 ( 3.56 )	5.38 ( 1.04 )	2.43 ( 0.38 )
Abdominal Lymphadenopathy	1	11.09 ( 1.56 - 78.96 )	11.09 ( 9.16 )	11.07 ( 2.14 )	3.47 ( 1.42 )
Arthropod Bite	1	1.84 ( 0.26 - 13.09 )	1.84 ( 0.38 )	1.84 ( 0.36 )	0.88 ( -1.16 )
Helicobacter Infection	1	0.91 ( 0.13 - 6.46 )	0.91 ( 0.01 )	0.91 ( 0.18 )	-0.14 ( -2.18 )
Skin Depigmentation	1	9.15 ( 1.29 - 65.12 )	9.15 ( 7.25 )	9.14 ( 1.77 )	3.19 ( 1.15 )
Seborrhoea	1	2.94 ( 0.41 - 20.91 )	2.94 ( 1.28 )	2.94 ( 0.57 )	1.56 ( -0.49 )
Cervicogenic Headache	1	122.04 ( 16.76 - 888.5 )	122.02 ( 117.02 )	118.99 ( 22.6 )	6.89 ( 4.8 )
Disability	1	0.44 ( 0.06 - 3.13 )	0.44 ( 0.71 )	0.44 ( 0.09 )	-1.18 ( -3.22 )
Ocular Icterus	1	4.46 ( 0.63 - 31.67 )	4.46 ( 2.68 )	4.45 ( 0.86 )	2.15 ( 0.11 )
Vulval Disorder	1	23.33 ( 3.27 - 166.47 )	23.33 ( 21.27 )	23.22 ( 4.48 )	4.54 ( 2.49 )
Trichorrhexis	1	5.63 ( 0.79 - 39.99 )	5.62 ( 3.8 )	5.62 ( 1.09 )	2.49 ( 0.45 )
Aphasia	1	0.51 ( 0.07 - 3.65 )	0.51 ( 0.46 )	0.51 ( 0.1 )	-0.96 ( -3 )
Microcytosis	1	60.25 ( 8.38 - 433.13 )	60.24 ( 57.52 )	59.5 ( 11.42 )	5.89 ( 3.83 )
Coronavirus Infection	1	0.8 ( 0.11 - 5.65 )	0.8 ( 0.05 )	0.8 ( 0.15 )	-0.33 ( -2.37 )
Daydreaming	1	9.15 ( 1.29 - 65.12 )	9.15 ( 7.25 )	9.14 ( 1.77 )	3.19 ( 1.15 )
Steatorrhoea	1	10.17 ( 1.43 - 72.37 )	10.17 ( 8.25 )	10.15 ( 1.96 )	3.34 ( 1.3 )
Orbital Oedema	1	38.7 ( 5.41 - 276.97 )	38.69 ( 36.42 )	38.38 ( 7.4 )	5.26 ( 3.21 )
Appendicitis	1	1.44 ( 0.2 - 10.21 )	1.44 ( 0.13 )	1.44 ( 0.28 )	0.52 ( -1.52 )
Pulmonary Embolism	1	0.2 ( 0.03 - 1.41 )	0.2 ( 3.22 )	0.2 ( 0.04 )	-2.33 ( -4.37 )
Myocardial Necrosis Marker Increased	1	6.76 ( 0.95 - 48.07 )	6.76 ( 4.9 )	6.75 ( 1.31 )	2.76 ( 0.71 )
Extrasystoles	1	2.73 ( 0.38 - 19.37 )	2.73 ( 1.09 )	2.72 ( 0.53 )	1.45 ( -0.6 )
Vaginal Infection	1	3.3 ( 0.46 - 23.44 )	3.3 ( 1.6 )	3.3 ( 0.64 )	1.72 ( -0.32 )
Hypothalamo-Pituitary Disorder	1	7.65 ( 1.08 - 54.42 )	7.65 ( 5.77 )	7.64 ( 1.48 )	2.93 ( 0.89 )
Tearfulness	1	4.57 ( 0.64 - 32.46 )	4.57 ( 2.78 )	4.56 ( 0.88 )	2.19 ( 0.15 )
Vaginal Ph Abnormal	1	475.96 ( 60.91 - 3718.98 )	475.86 ( 430.79 )	432.69 ( 77.46 )	8.76 ( 6.55 )
Meniscus Injury	1	1.96 ( 0.28 - 13.94 )	1.96 ( 0.47 )	1.96 ( 0.38 )	0.97 ( -1.07 )
Pulmonary Mass	1	0.77 ( 0.11 - 5.45 )	0.77 ( 0.07 )	0.77 ( 0.15 )	-0.38 ( -2.42 )
Metastases To Liver	1	0.74 ( 0.1 - 5.29 )	0.75 ( 0.09 )	0.75 ( 0.14 )	-0.42 ( -2.47 )
Investigation Abnormal	1	6.41 ( 0.9 - 45.61 )	6.41 ( 4.56 )	6.41 ( 1.24 )	2.68 ( 0.64 )
Respiration Abnormal	1	1.48 ( 0.21 - 10.51 )	1.48 ( 0.16 )	1.48 ( 0.29 )	0.57 ( -1.48 )
Ephelides	1	25.32 ( 3.55 - 180.71 )	25.31 ( 23.23 )	25.18 ( 4.86 )	4.65 ( 2.6 )
Sucrose Intolerance	1	339.97 ( 44.7 - 2585.98 )	339.9 ( 315.38 )	317.31 ( 58.1 )	8.31 ( 6.15 )
Blood Urine	1	21.25 ( 2.98 - 151.54 )	21.24 ( 19.21 )	21.15 ( 4.09 )	4.4 ( 2.35 )
Nutritional Condition Abnormal	1	18.89 ( 2.65 - 134.64 )	18.88 ( 16.87 )	18.81 ( 3.64 )	4.23 ( 2.18 )
Blood Sodium Increased	1	6.09 ( 0.86 - 43.33 )	6.09 ( 4.25 )	6.09 ( 1.18 )	2.61 ( 0.56 )
Diabetes Insipidus	1	5.15 ( 0.72 - 36.57 )	5.14 ( 3.34 )	5.14 ( 1 )	2.36 ( 0.32 )
Coordination Abnormal	1	1.7 ( 0.24 - 12.11 )	1.7 ( 0.29 )	1.7 ( 0.33 )	0.77 ( -1.27 )
Glioblastoma	1	7.68 ( 1.08 - 54.6 )	7.68 ( 5.8 )	7.66 ( 1.48 )	2.94 ( 0.89 )
Exposure Via Body Fluid	1	22.99 ( 3.22 - 164.04 )	22.99 ( 20.93 )	22.88 ( 4.42 )	4.52 ( 2.47 )
Blood Albumin Increased	1	18.59 ( 2.61 - 132.52 )	18.59 ( 16.58 )	18.52 ( 3.58 )	4.21 ( 2.16 )
Maternal Exposure During Pregnancy	1	0.11 ( 0.02 - 0.78 )	0.11 ( 7.27 )	0.11 ( 0.02 )	-3.19 ( -5.23 )
Chest Wall Abscess	1	61.02 ( 8.49 - 438.76 )	61.01 ( 58.28 )	60.25 ( 11.56 )	5.91 ( 3.85 )
Mass Excision	1	41.39 ( 5.78 - 296.4 )	41.38 ( 39.06 )	41.03 ( 7.9 )	5.36 ( 3.3 )
Abdominal Hernia	1	3.5 ( 0.49 - 24.85 )	3.5 ( 1.78 )	3.49 ( 0.68 )	1.81 ( -0.24 )
Dyschezia	1	2.95 ( 0.42 - 20.95 )	2.95 ( 1.29 )	2.95 ( 0.57 )	1.56 ( -0.48 )
Localised Oedema	1	3.62 ( 0.51 - 25.76 )	3.62 ( 1.9 )	3.62 ( 0.7 )	1.86 ( -0.19 )
Ear Discomfort	1	1.32 ( 0.19 - 9.41 )	1.32 ( 0.08 )	1.32 ( 0.26 )	0.41 ( -1.64 )
Salivary Hypersecretion	1	1.46 ( 0.21 - 10.38 )	1.46 ( 0.15 )	1.46 ( 0.28 )	0.55 ( -1.49 )
Intestinal Obstruction	1	0.36 ( 0.05 - 2.58 )	0.36 ( 1.11 )	0.36 ( 0.07 )	-1.46 ( -3.5 )
Sinus Congestion	1	1.11 ( 0.16 - 7.85 )	1.11 ( 0.01 )	1.11 ( 0.21 )	0.15 ( -1.9 )
Secretion Discharge	1	0.93 ( 0.13 - 6.6 )	0.93 ( 0.01 )	0.93 ( 0.18 )	-0.11 ( -2.15 )
Blood Potassium Decreased	1	0.49 ( 0.07 - 3.47 )	0.49 ( 0.54 )	0.49 ( 0.09 )	-1.03 ( -3.07 )
Blood Folate Decreased	1	17.96 ( 2.52 - 128.01 )	17.96 ( 15.95 )	17.89 ( 3.46 )	4.16 ( 2.11 )
Intermenstrual Bleeding	1	1.75 ( 0.25 - 12.45 )	1.75 ( 0.32 )	1.75 ( 0.34 )	0.81 ( -1.23 )
Thrombosis	1	0.17 ( 0.02 - 1.2 )	0.17 ( 4.08 )	0.17 ( 0.03 )	-2.56 ( -4.6 )
Vitamin B6 Decreased	1	46.21 ( 6.45 - 331.26 )	46.2 ( 43.8 )	45.77 ( 8.81 )	5.52 ( 3.46 )
Joint Warmth	1	12.53 ( 1.76 - 89.17 )	12.52 ( 10.57 )	12.49 ( 2.42 )	3.64 ( 1.6 )
Inflammatory Marker Increased	1	1.98 ( 0.28 - 14.07 )	1.98 ( 0.49 )	1.98 ( 0.38 )	0.99 ( -1.06 )
Platelet Count Increased	1	0.93 ( 0.13 - 6.6 )	0.93 ( 0.01 )	0.93 ( 0.18 )	-0.11 ( -2.15 )
Vasodilatation	1	6.76 ( 0.95 - 48.07 )	6.76 ( 4.9 )	6.75 ( 1.31 )	2.76 ( 0.71 )
Sialoadenitis	1	9.63 ( 1.35 - 68.55 )	9.63 ( 7.72 )	9.62 ( 1.86 )	3.27 ( 1.22 )
Disease Recurrence	1	0.16 ( 0.02 - 1.12 )	0.16 ( 4.51 )	0.16 ( 0.03 )	-2.66 ( -4.71 )
Photophobia	1	0.73 ( 0.1 - 5.16 )	0.73 ( 0.1 )	0.73 ( 0.14 )	-0.46 ( -2.5 )
Miliaria	1	6.6 ( 0.93 - 46.94 )	6.6 ( 4.75 )	6.59 ( 1.28 )	2.72 ( 0.68 )
Skin Ulcer	1	0.54 ( 0.08 - 3.84 )	0.54 ( 0.39 )	0.54 ( 0.1 )	-0.89 ( -2.93 )
Initial Insomnia	1	1.46 ( 0.21 - 10.36 )	1.46 ( 0.14 )	1.46 ( 0.28 )	0.54 ( -1.5 )
Sars-Cov-2 Test Positive	1	0.38 ( 0.05 - 2.72 )	0.38 ( 0.99 )	0.38 ( 0.07 )	-1.38 ( -3.42 )
Hyperaesthesia	1	1.98 ( 0.28 - 14.09 )	1.98 ( 0.49 )	1.98 ( 0.38 )	0.99 ( -1.05 )
Poverty Of Speech	1	34.74 ( 4.86 - 248.46 )	34.73 ( 32.53 )	34.49 ( 6.65 )	5.11 ( 3.05 )
Alcohol Use	1	12.11 ( 1.7 - 86.21 )	12.11 ( 10.17 )	12.08 ( 2.34 )	3.59 ( 1.55 )
Pain Management	1	83.5 ( 11.56 - 603.17 )	83.48 ( 80.09 )	82.06 ( 15.69 )	6.36 ( 4.28 )
Dizziness Exertional	1	15.11 ( 2.12 - 107.63 )	15.11 ( 13.13 )	15.06 ( 2.91 )	3.91 ( 1.87 )
Joint Noise	1	3.8 ( 0.54 - 27.04 )	3.8 ( 2.07 )	3.8 ( 0.74 )	1.93 ( -0.12 )
Formication	1	2.89 ( 0.41 - 20.52 )	2.89 ( 1.23 )	2.89 ( 0.56 )	1.53 ( -0.51 )
Oesophageal Discomfort	1	24.92 ( 3.49 - 177.86 )	24.91 ( 22.84 )	24.79 ( 4.79 )	4.63 ( 2.58 )
Joint Effusion	1	1.98 ( 0.28 - 14.05 )	1.98 ( 0.48 )	1.98 ( 0.38 )	0.98 ( -1.06 )
Product Label Confusion	1	1.96 ( 0.28 - 13.91 )	1.96 ( 0.47 )	1.96 ( 0.38 )	0.97 ( -1.07 )
Product Container Issue	1	1.63 ( 0.23 - 11.56 )	1.63 ( 0.24 )	1.63 ( 0.32 )	0.7 ( -1.34 )
Product Physical Issue	1	0.66 ( 0.09 - 4.72 )	0.66 ( 0.17 )	0.67 ( 0.13 )	-0.59 ( -2.63 )
Skeletal Injury	1	0.53 ( 0.07 - 3.77 )	0.53 ( 0.41 )	0.53 ( 0.1 )	-0.91 ( -2.95 )
Tooth Abscess	1	1.51 ( 0.21 - 10.72 )	1.51 ( 0.17 )	1.51 ( 0.29 )	0.59 ( -1.45 )
Blister	1	0.24 ( 0.03 - 1.72 )	0.24 ( 2.37 )	0.24 ( 0.05 )	-2.04 ( -4.09 )
Bacterial Vaginosis	1	7.74 ( 1.09 - 55.04 )	7.74 ( 5.86 )	7.73 ( 1.5 )	2.95 ( 0.91 )
Lymphocyte Count Decreased	1	0.58 ( 0.08 - 4.11 )	0.58 ( 0.31 )	0.58 ( 0.11 )	-0.79 ( -2.83 )
Vitamin B12 Decreased	1	4.28 ( 0.6 - 30.39 )	4.28 ( 2.51 )	4.27 ( 0.83 )	2.1 ( 0.05 )
Blood Urea Decreased	1	15.61 ( 2.19 - 111.17 )	15.6 ( 13.62 )	15.55 ( 3.01 )	3.96 ( 1.91 )
Puncture Site Discharge	1	528.85 ( 66.99 - 4175.21 )	528.74 ( 474.07 )	475.96 ( 84.48 )	8.89 ( 6.68 )
Thermal Burn	1	2.17 ( 0.31 - 15.4 )	2.17 ( 0.63 )	2.17 ( 0.42 )	1.12 ( -0.93 )
Acute Kidney Injury	1	0.07 ( 0.01 - 0.48 )	0.07 ( 12.95 )	0.07 ( 0.01 )	-3.89 ( -5.93 )
Nail Discolouration	1	3.37 ( 0.47 - 23.92 )	3.37 ( 1.66 )	3.36 ( 0.65 )	1.75 ( -0.29 )
Chapped Lips	1	3.74 ( 0.53 - 26.57 )	3.74 ( 2 )	3.74 ( 0.72 )	1.9 ( -0.14 )
Metastasis	1	1.81 ( 0.25 - 12.86 )	1.81 ( 0.36 )	1.81 ( 0.35 )	0.86 ( -1.19 )
Diverticulitis	1	0.49 ( 0.07 - 3.45 )	0.49 ( 0.55 )	0.49 ( 0.09 )	-1.04 ( -3.08 )
Multiple Sclerosis	1	0.28 ( 0.04 - 1.97 )	0.28 ( 1.89 )	0.28 ( 0.05 )	-1.85 ( -3.89 )
Intentional Product Misuse	1	0.15 ( 0.02 - 1.08 )	0.15 ( 4.74 )	0.15 ( 0.03 )	-2.72 ( -4.76 )
Feeling Of Body Temperature Change	1	2.7 ( 0.38 - 19.21 )	2.7 ( 1.07 )	2.7 ( 0.52 )	1.43 ( -0.61 )
Rheumatoid Arthritis	1	0.09 ( 0.01 - 0.66 )	0.09 ( 8.81 )	0.09 ( 0.02 )	-3.42 ( -5.46 )
Vulvovaginal Pruritus	1	3.07 ( 0.43 - 21.82 )	3.07 ( 1.4 )	3.07 ( 0.59 )	1.62 ( -0.42 )
Vulvovaginal Discomfort	1	4.03 ( 0.57 - 28.66 )	4.03 ( 2.28 )	4.03 ( 0.78 )	2.01 ( -0.03 )
Monocyte Count Decreased	1	10.24 ( 1.44 - 72.83 )	10.23 ( 8.31 )	10.21 ( 1.98 )	3.35 ( 1.31 )
High Density Lipoprotein Increased	1	14.83 ( 2.08 - 105.61 )	14.82 ( 12.85 )	14.78 ( 2.86 )	3.89 ( 1.84 )
Red Cell Distribution Width Increased	1	2.31 ( 0.33 - 16.4 )	2.31 ( 0.74 )	2.31 ( 0.45 )	1.21 ( -0.83 )
Lipids Increased	1	7.47 ( 1.05 - 53.14 )	7.47 ( 5.6 )	7.46 ( 1.45 )	2.9 ( 0.86 )
Low Density Lipoprotein Increased	1	2.15 ( 0.3 - 15.26 )	2.15 ( 0.61 )	2.15 ( 0.42 )	1.1 ( -0.94 )
Loose Body In Joint	1	46.66 ( 6.51 - 334.53 )	46.65 ( 44.24 )	46.21 ( 8.89 )	5.53 ( 3.47 )
Red Cell Distribution Width Abnormal	1	54.71 ( 7.62 - 392.86 )	54.7 ( 52.12 )	54.09 ( 10.39 )	5.76 ( 3.69 )
Mean Platelet Volume Increased	1	15.16 ( 2.13 - 107.97 )	15.15 ( 13.18 )	15.11 ( 2.92 )	3.92 ( 1.87 )
Ocular Discomfort	1	0.93 ( 0.13 - 6.63 )	0.93 ( 0 )	0.93 ( 0.18 )	-0.1 ( -2.14 )
Carpal Tunnel Decompression	1	17.69 ( 2.48 - 126.1 )	17.69 ( 15.69 )	17.63 ( 3.41 )	4.14 ( 2.09 )
Product Administration Interrupted	1	0.8 ( 0.11 - 5.71 )	0.8 ( 0.05 )	0.8 ( 0.16 )	-0.31 ( -2.36 )
Personality Change	1	1.87 ( 0.26 - 13.26 )	1.87 ( 0.4 )	1.87 ( 0.36 )	0.9 ( -1.14 )
Foreign Body In Eye	1	14.12 ( 1.98 - 100.58 )	14.12 ( 12.16 )	14.08 ( 2.72 )	3.82 ( 1.77 )
Cranioplasty	1	264.42 ( 35.29 - 1981.21 )	264.37 ( 248.56 )	250.51 ( 46.45 )	7.97 ( 5.83 )
Dyshidrotic Eczema	1	18.31 ( 2.57 - 130.48 )	18.3 ( 16.29 )	18.24 ( 3.53 )	4.19 ( 2.14 )
Musculoskeletal Pain	1	0.44 ( 0.06 - 3.15 )	0.44 ( 0.7 )	0.44 ( 0.09 )	-1.17 ( -3.22 )
Toxicity To Various Agents	1	0.08 ( 0.01 - 0.56 )	0.08 ( 10.76 )	0.08 ( 0.02 )	-3.66 ( -5.7 )
Blood Bilirubin Abnormal	1	10.92 ( 1.53 - 77.69 )	10.91 ( 8.99 )	10.89 ( 2.11 )	3.45 ( 1.4 )
Foot Operation	1	2.5 ( 0.35 - 17.78 )	2.5 ( 0.9 )	2.5 ( 0.48 )	1.32 ( -0.72 )
Intentional Underdose	1	2.34 ( 0.33 - 16.61 )	2.34 ( 0.77 )	2.34 ( 0.45 )	1.23 ( -0.82 )
Regurgitation	1	4.74 ( 0.67 - 33.69 )	4.74 ( 2.95 )	4.74 ( 0.92 )	2.24 ( 0.2 )
Blood Urea Increased	1	1.41 ( 0.2 - 10.02 )	1.41 ( 0.12 )	1.41 ( 0.27 )	0.5 ( -1.55 )
Viral Infection	1	0.43 ( 0.06 - 3.06 )	0.43 ( 0.75 )	0.43 ( 0.08 )	-1.22 ( -3.26 )
Blood Albumin Abnormal	1	23.56 ( 3.3 - 168.12 )	23.56 ( 21.49 )	23.45 ( 4.53 )	4.55 ( 2.5 )
Aphthous Ulcer	1	1.12 ( 0.16 - 7.97 )	1.12 ( 0.01 )	1.12 ( 0.22 )	0.17 ( -1.88 )
Wrist Fracture	1	1.15 ( 0.16 - 8.18 )	1.15 ( 0.02 )	1.15 ( 0.22 )	0.2 ( -1.84 )
Affective Disorder	1	1.69 ( 0.24 - 11.98 )	1.69 ( 0.28 )	1.69 ( 0.33 )	0.75 ( -1.29 )
Bipolar Disorder	1	1.62 ( 0.23 - 11.49 )	1.62 ( 0.24 )	1.62 ( 0.31 )	0.69 ( -1.35 )
Leukopenia	1	0.28 ( 0.04 - 1.98 )	0.28 ( 1.87 )	0.28 ( 0.05 )	-1.84 ( -3.89 )
Eye Colour Change	1	12.46 ( 1.75 - 88.7 )	12.46 ( 10.51 )	12.43 ( 2.41 )	3.64 ( 1.59 )
White Blood Cell Count Increased	1	0.43 ( 0.06 - 3.06 )	0.43 ( 0.75 )	0.43 ( 0.08 )	-1.21 ( -3.25 )
Blindness	1	0.33 ( 0.05 - 2.34 )	0.33 ( 1.36 )	0.33 ( 0.06 )	-1.6 ( -3.64 )
Pelvic Fracture	1	1.92 ( 0.27 - 13.6 )	1.91 ( 0.44 )	1.91 ( 0.37 )	0.94 ( -1.1 )
Neoplasm Recurrence	1	3.94 ( 0.55 - 27.98 )	3.94 ( 2.19 )	3.93 ( 0.76 )	1.98 ( -0.07 )
Nail Ridging	1	19.27 ( 2.7 - 137.37 )	19.27 ( 17.25 )	19.19 ( 3.71 )	4.26 ( 2.21 )
Hair Disorder	1	1.79 ( 0.25 - 12.74 )	1.79 ( 0.35 )	1.79 ( 0.35 )	0.84 ( -1.2 )
Tooth Discolouration	1	7.17 ( 1.01 - 50.97 )	7.17 ( 5.3 )	7.16 ( 1.39 )	2.84 ( 0.8 )
Skin Abrasion	1	2.32 ( 0.33 - 16.45 )	2.32 ( 0.75 )	2.31 ( 0.45 )	1.21 ( -0.83 )
Skin Sensitisation	1	17.31 ( 2.43 - 123.34 )	17.3 ( 15.31 )	17.25 ( 3.33 )	4.11 ( 2.06 )
Pain Of Skin	1	0.43 ( 0.06 - 3.03 )	0.43 ( 0.77 )	0.43 ( 0.08 )	-1.23 ( -3.27 )
Skin Laceration	1	0.83 ( 0.12 - 5.86 )	0.83 ( 0.04 )	0.83 ( 0.16 )	-0.28 ( -2.32 )
Tumour Flare	1	24.66 ( 3.46 - 176 )	24.66 ( 22.58 )	24.53 ( 4.74 )	4.62 ( 2.57 )
Mental Status Changes	1	0.68 ( 0.1 - 4.84 )	0.68 ( 0.15 )	0.68 ( 0.13 )	-0.55 ( -2.59 )
Blood Urine Present	1	0.85 ( 0.12 - 6.03 )	0.85 ( 0.03 )	0.85 ( 0.16 )	-0.24 ( -2.28 )
Brain Injury	1	1.16 ( 0.16 - 8.23 )	1.16 ( 0.02 )	1.16 ( 0.22 )	0.21 ( -1.83 )
Product Dispensing Issue	1	3.19 ( 0.45 - 22.68 )	3.19 ( 1.5 )	3.19 ( 0.62 )	1.67 ( -0.37 )
Magnetic Resonance Imaging	1	43.27 ( 6.04 - 309.99 )	43.26 ( 40.91 )	42.88 ( 8.25 )	5.42 ( 3.36 )
Tonsillar Inflammation	1	40.68 ( 5.68 - 291.29 )	40.67 ( 38.37 )	40.34 ( 7.77 )	5.33 ( 3.28 )
Oesophageal Pain	1	4.46 ( 0.63 - 31.7 )	4.46 ( 2.68 )	4.46 ( 0.86 )	2.16 ( 0.11 )
Frustration Tolerance Decreased	1	1.14 ( 0.16 - 8.08 )	1.14 ( 0.02 )	1.14 ( 0.22 )	0.19 ( -1.86 )
Productive Cough	1	0.24 ( 0.03 - 1.71 )	0.24 ( 2.4 )	0.24 ( 0.05 )	-2.06 ( -4.1 )
Thinking Abnormal	1	0.96 ( 0.14 - 6.83 )	0.96 ( 0 )	0.96 ( 0.19 )	-0.06 ( -2.1 )
Dysgraphia	1	2.12 ( 0.3 - 15.09 )	2.12 ( 0.59 )	2.12 ( 0.41 )	1.09 ( -0.96 )
Skin Graft	1	26.44 ( 3.7 - 188.78 )	26.44 ( 24.34 )	26.3 ( 5.08 )	4.72 ( 2.66 )
Ear Operation	1	32.6 ( 4.56 - 233.04 )	32.59 ( 30.42 )	32.38 ( 6.24 )	5.02 ( 2.96 )
Full Blood Count Abnormal	1	0.6 ( 0.08 - 4.25 )	0.6 ( 0.27 )	0.6 ( 0.12 )	-0.74 ( -2.78 )
Visual Acuity Reduced	1	0.98 ( 0.14 - 6.95 )	0.98 ( 0 )	0.98 ( 0.19 )	-0.03 ( -2.07 )
Breast Abscess	1	11.25 ( 1.58 - 80.08 )	11.25 ( 9.32 )	11.23 ( 2.17 )	3.49 ( 1.44 )
Sleeve Gastrectomy	1	40 ( 5.59 - 286.35 )	39.99 ( 37.7 )	39.66 ( 7.64 )	5.31 ( 3.25 )
Dermatitis Acneiform	1	2.35 ( 0.33 - 16.72 )	2.35 ( 0.78 )	2.35 ( 0.46 )	1.23 ( -0.81 )
Pain In Jaw	1	0.55 ( 0.08 - 3.92 )	0.55 ( 0.37 )	0.55 ( 0.11 )	-0.86 ( -2.9 )
Full Blood Count Decreased	1	0.56 ( 0.08 - 3.99 )	0.56 ( 0.34 )	0.56 ( 0.11 )	-0.83 ( -2.87 )
Hormone Level Abnormal	1	2.85 ( 0.4 - 20.22 )	2.85 ( 1.2 )	2.84 ( 0.55 )	1.51 ( -0.53 )
Joint Range Of Motion Decreased	1	0.9 ( 0.13 - 6.42 )	0.9 ( 0.01 )	0.9 ( 0.18 )	-0.15 ( -2.19 )
Rash Papular	1	0.75 ( 0.11 - 5.35 )	0.75 ( 0.08 )	0.75 ( 0.15 )	-0.41 ( -2.45 )
Ear Infection	1	0.45 ( 0.06 - 3.22 )	0.45 ( 0.66 )	0.45 ( 0.09 )	-1.14 ( -3.18 )
Preoperative Care	1	4759.64 ( 297.65 - 76109.75 )	4758.63 ( 2378.32 )	2379.82 ( 234.01 )	11.22 ( 8.58 )
Agitation	1	0.26 ( 0.04 - 1.85 )	0.26 ( 2.1 )	0.26 ( 0.05 )	-1.94 ( -3.98 )
Small Intestinal Obstruction	1	1.23 ( 0.17 - 8.76 )	1.23 ( 0.04 )	1.23 ( 0.24 )	0.3 ( -1.74 )
Vanishing Bile Duct Syndrome	1	12.93 ( 1.82 - 92.08 )	12.93 ( 10.98 )	12.9 ( 2.5 )	3.69 ( 1.64 )
Thyroxine Decreased	1	26.59 ( 3.72 - 189.84 )	26.58 ( 24.49 )	26.44 ( 5.11 )	4.72 ( 2.67 )
Blood Thyroid Stimulating Hormone Increased	1	1.81 ( 0.25 - 12.86 )	1.81 ( 0.36 )	1.81 ( 0.35 )	0.86 ( -1.19 )
Dementia	1	0.43 ( 0.06 - 3.03 )	0.43 ( 0.77 )	0.43 ( 0.08 )	-1.23 ( -3.27 )
Sleep Deficit	1	3.67 ( 0.52 - 26.1 )	3.67 ( 1.94 )	3.67 ( 0.71 )	1.88 ( -0.17 )
Food Refusal	1	11.36 ( 1.6 - 80.85 )	11.36 ( 9.42 )	11.33 ( 2.19 )	3.5 ( 1.46 )
Cerebrovascular Accident	1	0.11 ( 0.02 - 0.78 )	0.11 ( 7.23 )	0.11 ( 0.02 )	-3.19 ( -5.23 )
Sticky Skin	1	32.16 ( 4.5 - 229.87 )	32.15 ( 29.98 )	31.94 ( 6.16 )	5 ( 2.94 )
Jaw Disorder	1	4.35 ( 0.61 - 30.92 )	4.35 ( 2.58 )	4.35 ( 0.84 )	2.12 ( 0.08 )
Hepatic Steatosis	1	0.79 ( 0.11 - 5.64 )	0.79 ( 0.05 )	0.79 ( 0.15 )	-0.33 ( -2.37 )
Deficiency Of Bile Secretion	1	105.77 ( 14.58 - 767.49 )	105.75 ( 101.5 )	103.47 ( 19.71 )	6.69 ( 4.61 )
Amenorrhoea	1	1.25 ( 0.18 - 8.91 )	1.25 ( 0.05 )	1.25 ( 0.24 )	0.33 ( -1.71 )
Product After Taste	1	8.03 ( 1.13 - 57.09 )	8.02 ( 6.14 )	8.01 ( 1.55 )	3 ( 0.96 )
Melanocytic Hyperplasia	1	396.64 ( 51.56 - 3051.08 )	396.55 ( 364.21 )	366.13 ( 66.41 )	8.52 ( 6.33 )
Hidradenitis	1	1.05 ( 0.15 - 7.48 )	1.05 ( 0 )	1.05 ( 0.2 )	0.07 ( -1.97 )
Hyponatraemia	1	0.27 ( 0.04 - 1.91 )	0.27 ( 1.99 )	0.27 ( 0.05 )	-1.9 ( -3.94 )
Temperature Regulation Disorder	1	4.91 ( 0.69 - 34.91 )	4.91 ( 3.11 )	4.91 ( 0.95 )	2.29 ( 0.25 )
Electric Shock Sensation	1	2.75 ( 0.39 - 19.56 )	2.75 ( 1.12 )	2.75 ( 0.53 )	1.46 ( -0.58 )
Muscle Enzyme Increased	1	44.07 ( 6.15 - 315.78 )	44.06 ( 41.7 )	43.67 ( 8.41 )	5.45 ( 3.39 )
Menopause	1	5.32 ( 0.75 - 37.8 )	5.32 ( 3.5 )	5.31 ( 1.03 )	2.41 ( 0.37 )
Oesophagogastroduodenoscopy	1	101.27 ( 13.97 - 734.16 )	101.25 ( 97.19 )	99.16 ( 18.9 )	6.63 ( 4.55 )
Radiotherapy	1	7.17 ( 1.01 - 50.97 )	7.17 ( 5.3 )	7.16 ( 1.39 )	2.84 ( 0.8 )
Pneumonitis	1	0.44 ( 0.06 - 3.13 )	0.44 ( 0.71 )	0.44 ( 0.09 )	-1.18 ( -3.22 )
Tension Headache	1	2.83 ( 0.4 - 20.14 )	2.83 ( 1.19 )	2.83 ( 0.55 )	1.5 ( -0.54 )
Motion Sickness	1	7.87 ( 1.11 - 55.95 )	7.87 ( 5.98 )	7.85 ( 1.52 )	2.97 ( 0.93 )
Nerve Compression	1	1.45 ( 0.2 - 10.3 )	1.45 ( 0.14 )	1.45 ( 0.28 )	0.54 ( -1.51 )
Selective Eating Disorder	1	11.78 ( 1.66 - 83.86 )	11.78 ( 9.84 )	11.75 ( 2.27 )	3.55 ( 1.51 )
Delayed Menarche	1	1189.91 ( 132.97 - 10648.39 )	1189.66 ( 950.13 )	951.93 ( 152.13 )	9.89 ( 7.54 )
Educational Problem	1	15.26 ( 2.14 - 108.66 )	15.25 ( 13.28 )	15.21 ( 2.94 )	3.93 ( 1.88 )
Anger	1	0.55 ( 0.08 - 3.91 )	0.55 ( 0.37 )	0.55 ( 0.11 )	-0.86 ( -2.9 )
Eye Contusion	1	4.98 ( 0.7 - 35.42 )	4.98 ( 3.18 )	4.98 ( 0.96 )	2.32 ( 0.27 )
Craniofacial Fracture	1	15.11 ( 2.12 - 107.63 )	15.11 ( 13.13 )	15.06 ( 2.91 )	3.91 ( 1.87 )
Lung Operation	1	15.71 ( 2.21 - 111.9 )	15.71 ( 13.72 )	15.66 ( 3.03 )	3.97 ( 1.92 )
Eye Movement Disorder	1	2.43 ( 0.34 - 17.26 )	2.43 ( 0.84 )	2.43 ( 0.47 )	1.28 ( -0.76 )
Biopsy	1	16.58 ( 2.33 - 118.16 )	16.58 ( 14.59 )	16.53 ( 3.2 )	4.05 ( 2 )
Mental Fatigue	1	6.53 ( 0.92 - 46.42 )	6.53 ( 4.67 )	6.52 ( 1.26 )	2.7 ( 0.66 )
Fracture	1	0.6 ( 0.08 - 4.27 )	0.6 ( 0.26 )	0.6 ( 0.12 )	-0.73 ( -2.78 )
Cartilage Injury	1	5.83 ( 0.82 - 41.42 )	5.82 ( 3.99 )	5.82 ( 1.13 )	2.54 ( 0.5 )
Product Prescribing Issue	1	0.47 ( 0.07 - 3.37 )	0.47 ( 0.58 )	0.47 ( 0.09 )	-1.08 ( -3.12 )
Melanocytic Naevus	1	2.66 ( 0.37 - 18.91 )	2.66 ( 1.04 )	2.66 ( 0.52 )	1.41 ( -0.63 )
Gastric Dilatation	1	9.44 ( 1.33 - 67.19 )	9.44 ( 7.53 )	9.43 ( 1.82 )	3.24 ( 1.19 )
Tendon Disorder	1	2.48 ( 0.35 - 17.64 )	2.48 ( 0.88 )	2.48 ( 0.48 )	1.31 ( -0.73 )
Muscle Rupture	1	3.55 ( 0.5 - 25.2 )	3.55 ( 1.83 )	3.54 ( 0.69 )	1.83 ( -0.22 )
Tendon Injury	1	5.56 ( 0.78 - 39.53 )	5.56 ( 3.73 )	5.55 ( 1.08 )	2.47 ( 0.43 )
Breast Cancer	1	0.08 ( 0.01 - 0.59 )	0.08 ( 10.05 )	0.08 ( 0.02 )	-3.58 ( -5.62 )
White Blood Cell Disorder	1	4.64 ( 0.65 - 32.97 )	4.64 ( 2.85 )	4.63 ( 0.9 )	2.21 ( 0.17 )
Platelet Disorder	1	4.52 ( 0.64 - 32.12 )	4.52 ( 2.74 )	4.52 ( 0.88 )	2.17 ( 0.13 )
Dose Calculation Error	1	14.42 ( 2.03 - 102.72 )	14.42 ( 12.45 )	14.38 ( 2.78 )	3.85 ( 1.8 )
Hysterectomy	1	1.9 ( 0.27 - 13.5 )	1.9 ( 0.43 )	1.9 ( 0.37 )	0.93 ( -1.12 )
Dry Throat	1	1.4 ( 0.2 - 9.92 )	1.4 ( 0.11 )	1.4 ( 0.27 )	0.48 ( -1.56 )
Colonoscopy	1	5.93 ( 0.83 - 42.19 )	5.93 ( 4.1 )	5.93 ( 1.15 )	2.57 ( 0.52 )
Faeces Hard	1	3.09 ( 0.44 - 21.97 )	3.09 ( 1.41 )	3.09 ( 0.6 )	1.63 ( -0.41 )
Food Poisoning	1	2.3 ( 0.32 - 16.37 )	2.3 ( 0.74 )	2.3 ( 0.45 )	1.2 ( -0.84 )
Loose Tooth	1	6.05 ( 0.85 - 43 )	6.05 ( 4.21 )	6.04 ( 1.17 )	2.59 ( 0.55 )
Hepatic Pain	1	3.5 ( 0.49 - 24.89 )	3.5 ( 1.79 )	3.5 ( 0.68 )	1.81 ( -0.23 )
Diet Noncompliance	1	23.8 ( 3.34 - 169.81 )	23.79 ( 21.73 )	23.68 ( 4.57 )	4.57 ( 2.51 )
Upper Limb Fracture	1	0.72 ( 0.1 - 5.09 )	0.72 ( 0.11 )	0.72 ( 0.14 )	-0.48 ( -2.52 )
Bradykinesia	1	1.59 ( 0.22 - 11.29 )	1.59 ( 0.22 )	1.59 ( 0.31 )	0.67 ( -1.37 )
Sluggishness	1	1.48 ( 0.21 - 10.49 )	1.48 ( 0.15 )	1.48 ( 0.29 )	0.56 ( -1.48 )
