# Supplementary material for: The real-world safety of Pexidartinib: a pharmacovigilance analysis based on the FDA adverse event reporting system
Source: Research Square preprint supplement (doi:10.21203/rs.3.rs-6283844/v1), 2025-05-06
Supplement: Supplementary file 2 [file 15bd48bf10ed989285c5956d.xlsx]

## Sheet: Sheet1
PT	Cases(n)	ROR(95%CI)	PRR(χ2)	EBGM(EBGM05)	IC(IC025)
Fatigue	372	4.1 ( 3.7 - 4.56 )	3.95 ( 827.92 )	3.94 ( 3.61 )	1.98 ( 1.83 )
Product Dose Omission Issue	341	5.57 ( 5 - 6.21 )	5.36 ( 1217.1 )	5.35 ( 4.88 )	2.42 ( 2.26 )
Hair Colour Changes	300	224.64 ( 199.36 - 253.11 )	215.46 ( 59872.94 )	201.47 ( 182.32 )	7.65 ( 7.48 )
Nausea	203	2.51 ( 2.18 - 2.88 )	2.46 ( 178.34 )	2.46 ( 2.19 )	1.3 ( 1.1 )
Pruritus	165	3.71 ( 3.18 - 4.33 )	3.65 ( 319.01 )	3.65 ( 3.2 )	1.87 ( 1.64 )
Rash	127	2.48 ( 2.08 - 2.96 )	2.45 ( 110.1 )	2.45 ( 2.12 )	1.29 ( 1.04 )
Aspartate Aminotransferase Increased	124	26.84 ( 22.46 - 32.08 )	26.41 ( 3007.35 )	26.19 ( 22.56 )	4.71 ( 4.45 )
Alanine Aminotransferase Increased	116	20.69 ( 17.21 - 24.87 )	20.38 ( 2125.5 )	20.25 ( 17.36 )	4.34 ( 4.07 )
Off Label Use	110	0.78 ( 0.65 - 0.94 )	0.79 ( 6.54 )	0.79 ( 0.67 )	-0.35 ( -0.62 )
Diarrhoea	105	1.35 ( 1.12 - 1.64 )	1.35 ( 9.61 )	1.35 ( 1.15 )	0.43 ( 0.15 )
Pain	104	1.21 ( 1 - 1.47 )	1.21 ( 3.76 )	1.21 ( 1.03 )	0.27 ( -0.01 )
Arthralgia	88	1.68 ( 1.36 - 2.07 )	1.67 ( 23.78 )	1.67 ( 1.4 )	0.74 ( 0.43 )
Headache	86	1.29 ( 1.04 - 1.59 )	1.28 ( 5.44 )	1.28 ( 1.07 )	0.36 ( 0.05 )
Product Dose Omission In Error	83	16.24 ( 13.07 - 20.17 )	16.07 ( 1167.4 )	15.99 ( 13.33 )	4 ( 3.68 )
Gamma-Glutamyltransferase Increased	73	41.61 ( 32.99 - 52.48 )	41.2 ( 2826.53 )	40.67 ( 33.49 )	5.35 ( 5.01 )
Dizziness	71	1.41 ( 1.12 - 1.78 )	1.41 ( 8.36 )	1.41 ( 1.16 )	0.49 ( 0.15 )
Blood Alkaline Phosphatase Increased	69	38.97 ( 30.7 - 49.47 )	38.61 ( 2497.47 )	38.15 ( 31.25 )	5.25 ( 4.9 )
Hepatic Enzyme Increased	67	7.97 ( 6.26 - 10.14 )	7.91 ( 403.66 )	7.89 ( 6.45 )	2.98 ( 2.63 )
Feeling Abnormal	65	2.67 ( 2.09 - 3.41 )	2.66 ( 67.27 )	2.65 ( 2.16 )	1.41 ( 1.05 )
Decreased Appetite	65	2.39 ( 1.87 - 3.05 )	2.38 ( 52.02 )	2.38 ( 1.94 )	1.25 ( 0.89 )
Therapy Cessation	65	9 ( 7.05 - 11.49 )	8.93 ( 456.65 )	8.9 ( 7.26 )	3.15 ( 2.8 )
Periorbital Swelling	64	53.81 ( 41.99 - 68.97 )	53.35 ( 3232.29 )	52.46 ( 42.62 )	5.71 ( 5.35 )
Vomiting	60	1.26 ( 0.97 - 1.62 )	1.25 ( 3.09 )	1.25 ( 1.01 )	0.33 ( -0.05 )
Abdominal Discomfort	57	2.69 ( 2.08 - 3.5 )	2.68 ( 60.21 )	2.68 ( 2.15 )	1.42 ( 1.04 )
Constipation	55	2.19 ( 1.68 - 2.86 )	2.19 ( 35.47 )	2.18 ( 1.75 )	1.13 ( 0.74 )
No Adverse Event	55	2.3 ( 1.76 - 3 )	2.29 ( 39.95 )	2.29 ( 1.83 )	1.19 ( 0.81 )
Product Use Issue	52	2.19 ( 1.67 - 2.88 )	2.18 ( 33.32 )	2.18 ( 1.73 )	1.12 ( 0.73 )
Abdominal Pain Upper	50	2.27 ( 1.72 - 3 )	2.26 ( 35.33 )	2.26 ( 1.79 )	1.18 ( 0.77 )
Somnolence	50	2.4 ( 1.82 - 3.17 )	2.39 ( 40.43 )	2.39 ( 1.89 )	1.26 ( 0.85 )
Malaise	50	1.12 ( 0.85 - 1.48 )	1.12 ( 0.66 )	1.12 ( 0.89 )	0.17 ( -0.24 )
Swelling Face	49	7.9 ( 5.96 - 10.47 )	7.86 ( 292.65 )	7.84 ( 6.19 )	2.97 ( 2.56 )
Liver Function Test Increased	49	15.01 ( 11.33 - 19.89 )	14.92 ( 633.49 )	14.85 ( 11.73 )	3.89 ( 3.48 )
Covid-19	49	0.96 ( 0.72 - 1.27 )	0.96 ( 0.09 )	0.96 ( 0.76 )	-0.06 ( -0.47 )
Alopecia	48	2.09 ( 1.58 - 2.78 )	2.09 ( 27.25 )	2.09 ( 1.65 )	1.06 ( 0.65 )
Skin Discolouration	47	9.5 ( 7.13 - 12.66 )	9.44 ( 353.92 )	9.42 ( 7.4 )	3.24 ( 2.82 )
Eye Swelling	46	12.39 ( 9.27 - 16.57 )	12.32 ( 476.91 )	12.28 ( 9.63 )	3.62 ( 3.19 )
Pain In Extremity	44	1.41 ( 1.05 - 1.9 )	1.41 ( 5.23 )	1.41 ( 1.1 )	0.49 ( 0.06 )
Asthenia	43	1.08 ( 0.8 - 1.46 )	1.08 ( 0.25 )	1.08 ( 0.84 )	0.11 ( -0.33 )
Blood Bilirubin Increased	42	18.4 ( 13.57 - 24.94 )	18.3 ( 682.9 )	18.19 ( 14.11 )	4.19 ( 3.74 )
Pyrexia	40	1.03 ( 0.76 - 1.41 )	1.03 ( 0.05 )	1.03 ( 0.8 )	0.05 ( -0.4 )
Taste Disorder	39	8.62 ( 6.29 - 11.81 )	8.58 ( 260.46 )	8.56 ( 6.57 )	3.1 ( 2.64 )
Treatment Noncompliance	39	6.51 ( 4.75 - 8.92 )	6.48 ( 180.63 )	6.47 ( 4.97 )	2.69 ( 2.24 )
Therapy Interrupted	38	2.45 ( 1.78 - 3.37 )	2.44 ( 32.37 )	2.44 ( 1.87 )	1.29 ( 0.82 )
Adverse Drug Reaction	38	3.06 ( 2.23 - 4.21 )	3.05 ( 52.48 )	3.05 ( 2.34 )	1.61 ( 1.15 )
Joint Swelling	37	2.23 ( 1.61 - 3.08 )	2.22 ( 24.94 )	2.22 ( 1.7 )	1.15 ( 0.68 )
Peripheral Swelling	36	1.59 ( 1.15 - 2.21 )	1.59 ( 7.84 )	1.59 ( 1.21 )	0.67 ( 0.19 )
Hypertension	36	1.52 ( 1.1 - 2.12 )	1.52 ( 6.47 )	1.52 ( 1.16 )	0.61 ( 0.13 )
Incorrect Dose Administered	35	1.16 ( 0.84 - 1.62 )	1.16 ( 0.81 )	1.16 ( 0.88 )	0.22 ( -0.26 )
Disease Progression	34	2.25 ( 1.6 - 3.15 )	2.24 ( 23.36 )	2.24 ( 1.69 )	1.16 ( 0.67 )
Memory Impairment	33	2.1 ( 1.49 - 2.96 )	2.1 ( 18.95 )	2.1 ( 1.57 )	1.07 ( 0.57 )
