# Supplementary material for: The real-world safety of Pexidartinib: a pharmacovigilance analysis based on the FDA adverse event reporting system
Source: Research Square preprint supplement (doi:10.21203/rs.3.rs-6283844/v1), 2025-05-06
Supplement: Supplementary file 3 [file 5cfea3751b42c6ce939b61f5.xlsx]

## Sheet: Sheet1
PT	a	b	c	d	ROR(95%CI)			Target adverse drug event with agalsidase beta	Other adverse drug events with agalsidase beta	Sums
Constipation	47	4493	6	2214	3.86(1.65-9.04)		Males	a	b	a+b
Alopecia	37	4503	6	2214	3.03(1.28-7.19)		Females	c	d	c+d
Taste Disorder	27	4513	5	2215	2.65(1.02-6.89)		Sums	a+c	b+d	a+b+c+d
Anxiety	25	4515	5	2215	2.45(0.94-6.42)
White Blood Cell Count Decreased	24	4516	5	2215	2.35(0.9-6.18)
Eye Swelling	32	4508	8	2212	1.96(0.9-4.27)
Nausea	151	4389	41	2179	1.83(1.29-2.59)
Swelling	21	4519	6	2214	1.71(0.69-4.25)
Vomiting	43	4497	13	2207	1.62(0.87-3.03)
Diarrhoea	75	4465	25	2195	1.47(0.94-2.33)
Abdominal Pain Upper	34	4506	12	2208	1.39(0.72-2.69)
Blood Alkaline Phosphatase Increased	44	4496	16	2204	1.35(0.76-2.39)
Gamma-Glutamyltransferase Increased	46	4494	17	2203	1.33(0.76-2.32)
Pain	70	4470	26	2194	1.32(0.84-2.08)
Adverse Drug Reaction	24	4516	9	2211	1.31(0.61-2.81)
Dry Skin	21	4519	8	2212	1.28(0.57-2.91)
Feeling Abnormal	44	4496	17	2203	1.27(0.72-2.22)
Surgery	23	4517	9	2211	1.25(0.58-2.71)
Headache	58	4482	23	2197	1.24(0.76-2.01)
Pain In Extremity	30	4510	12	2208	1.22(0.63-2.4)
Periorbital Swelling	42	4498	17	2203	1.21(0.69-2.13)
Alanine Aminotransferase Increased	69	4471	28	2192	1.21(0.78-1.88)
Pyrexia	27	4513	11	2209	1.2(0.59-2.43)
Malaise	34	4506	14	2206	1.19(0.64-2.22)
Covid-19	34	4506	14	2206	1.19(0.64-2.22)
Swelling Face	32	4508	14	2206	1.12(0.6-2.1)
Liver Function Test Increased	34	4506	15	2205	1.11(0.6-2.04)
Blood Bilirubin Increased	22	4518	10	2210	1.08(0.51-2.28)
Incorrect Dose Administered	23	4517	11	2209	1.02(0.5-2.1)
Dizziness	43	4497	21	2199	1(0.59-1.69)
Rash	77	4463	38	2182	0.99(0.67-1.47)
Aspartate Aminotransferase Increased	69	4471	36	2184	0.94(0.62-1.41)
Decreased Appetite	40	4500	21	2199	0.93(0.55-1.58)
Peripheral Swelling	22	4518	12	2208	0.9(0.44-1.81)
Therapy Cessation	42	4498	23	2197	0.89(0.54-1.49)
Abdominal Discomfort	36	4504	20	2200	0.88(0.51-1.52)
Fatigue	226	4314	126	2094	0.87(0.7-1.09)
Joint Swelling	23	4517	13	2207	0.86(0.44-1.71)
Arthralgia	52	4488	32	2188	0.79(0.51-1.23)
Skin Discolouration	29	4511	18	2202	0.79(0.44-1.42)
Pruritus	91	4449	58	2162	0.76(0.55-1.06)
Off Label Use	51	4489	33	2187	0.75(0.48-1.17)
Therapy Interrupted	23	4517	15	2205	0.75(0.39-1.44)
Product Dose Omission Issue	202	4338	136	2084	0.71(0.57-0.89)
Hair Colour Changes	159	4381	118	2102	0.65(0.51-0.82)
Hepatic Enzyme Increased	32	4508	25	2195	0.62(0.37-1.05)
Asthenia	22	4518	18	2202	0.6(0.32-1.11)
Product Dose Omission In Error	44	4496	39	2181	0.55(0.35-0.84)
Somnolence	23	4517	23	2197	0.49(0.27-0.87)
Product Use Issue	22	4518	30	2190	0.36(0.2-0.62)
