# Supplementary material for: The real-world safety of Pexidartinib: a pharmacovigilance analysis based on the FDA adverse event reporting system
Source: Research Square preprint supplement (doi:10.21203/rs.3.rs-6283844/v1), 2025-05-06
Supplement: Supplementary file 4 [file 737915371b50e6f495ae3ad4.xlsx]

## Sheet: Sheet1
SOC	Cases(n)	ROR(95%CI)	PRR(χ2)	EBGM(EBGM05)	IC(IC025)
General Disorders And Administration Site Conditions	1230	0.94 ( 0.88 - 1 )	0.95 ( 4.1 )	0.95 ( 0.9 )	-0.08 ( -0.16 )
Investigations	985	2.52 ( 2.36 - 2.7 )	2.32 ( 784 )	2.32 ( 2.19 )	1.21 ( 1.11 )
Skin And Subcutaneous Tissue Disorders	950	2.59 ( 2.42 - 2.78 )	2.39 ( 808.86 )	2.39 ( 2.25 )	1.25 ( 1.15 )
Injury, Poisoning And Procedural Complications	813	0.88 ( 0.82 - 0.95 )	0.9 ( 11.37 )	0.9 ( 0.84 )	-0.16 ( -0.27 )
Gastrointestinal Disorders	782	1.41 ( 1.31 - 1.52 )	1.36 ( 82.62 )	1.36 ( 1.28 )	0.45 ( 0.34 )
Nervous System Disorders	581	1.1 ( 1.01 - 1.2 )	1.09 ( 4.83 )	1.09 ( 1.02 )	0.13 ( 0 )
Musculoskeletal And Connective Tissue Disorders	349	0.93 ( 0.83 - 1.04 )	0.93 ( 1.76 )	0.93 ( 0.85 )	-0.1 ( -0.26 )
Eye Disorders	265	1.89 ( 1.68 - 2.14 )	1.86 ( 107.89 )	1.86 ( 1.68 )	0.9 ( 0.72 )
Infections And Infestations	221	0.52 ( 0.46 - 0.6 )	0.53 ( 94.67 )	0.54 ( 0.48 )	-0.9 ( -1.1 )
Surgical And Medical Procedures	217	2.02 ( 1.76 - 2.31 )	1.99 ( 108.31 )	1.99 ( 1.78 )	0.99 ( 0.79 )
Psychiatric Disorders	203	0.5 ( 0.44 - 0.58 )	0.52 ( 96.36 )	0.52 ( 0.46 )	-0.95 ( -1.15 )
Metabolism And Nutrition Disorders	127	0.9 ( 0.76 - 1.08 )	0.9 ( 1.3 )	0.9 ( 0.78 )	-0.14 ( -0.4 )
Respiratory, Thoracic And Mediastinal Disorders	106	0.31 ( 0.26 - 0.38 )	0.32 ( 160.63 )	0.32 ( 0.27 )	-1.64 ( -1.93 )
Vascular Disorders	71	0.52 ( 0.41 - 0.66 )	0.53 ( 30.74 )	0.53 ( 0.43 )	-0.92 ( -1.27 )
Hepatobiliary Disorders	70	1.15 ( 0.91 - 1.46 )	1.15 ( 1.44 )	1.15 ( 0.95 )	0.21 ( -0.14 )
Renal And Urinary Disorders	54	0.39 ( 0.3 - 0.52 )	0.4 ( 49.83 )	0.4 ( 0.32 )	-1.33 ( -1.72 )
Neoplasms Benign, Malignant And Unspecified (Incl Cysts And Polyps)	48	0.17 ( 0.12 - 0.22 )	0.17 ( 201.03 )	0.17 ( 0.13 )	-2.55 ( -2.96 )
Reproductive System And Breast Disorders	46	1.05 ( 0.79 - 1.4 )	1.05 ( 0.11 )	1.05 ( 0.82 )	0.07 ( -0.35 )
Immune System Disorders	45	0.53 ( 0.4 - 0.71 )	0.53 ( 18.52 )	0.53 ( 0.42 )	-0.91 ( -1.33 )
Blood And Lymphatic System Disorders	43	0.34 ( 0.25 - 0.46 )	0.34 ( 55.4 )	0.34 ( 0.27 )	-1.55 ( -1.98 )
Social Circumstances	38	1.09 ( 0.79 - 1.5 )	1.09 ( 0.27 )	1.09 ( 0.83 )	0.12 ( -0.34 )
Product Issues	21	0.15 ( 0.1 - 0.23 )	0.15 ( 102.54 )	0.15 ( 0.11 )	-2.73 ( -3.35 )
Ear And Labyrinth Disorders	18	0.6 ( 0.38 - 0.95 )	0.6 ( 4.77 )	0.6 ( 0.41 )	-0.73 ( -1.4 )
Cardiac Disorders	16	0.11 ( 0.07 - 0.18 )	0.11 ( 114.58 )	0.11 ( 0.07 )	-3.15 ( -3.86 )
Endocrine Disorders	10	0.51 ( 0.28 - 0.96 )	0.51 ( 4.59 )	0.51 ( 0.31 )	-0.96 ( -1.83 )
Pregnancy, Puerperium And Perinatal Conditions	2	0.08 ( 0.02 - 0.32 )	0.08 ( 21.15 )	0.08 ( 0.03 )	-3.64 ( -5.31 )
