# Supplementary material for: The real-world safety of Pexidartinib: a pharmacovigilance analysis based on the FDA adverse event reporting system
Source: Research Square preprint supplement (doi:10.21203/rs.3.rs-6283844/v1), 2025-05-06
Supplement: Supplementary file 5 [file e96a59331a16893fe223bf9f.docx]

**Supplementary Table 1. Algorithm for disproportionate**

| **Drugs** | **Target AE cases** | **All other AE cases** |
| --- | --- | --- |
| Target drug | a | b |
| All other drug | c | d |

| **Method** | **Formula** | **Requirements** |
| --- | --- | --- |
| ROR |  | a≥3, 95% CI (lower limit)＞1 |
|  |
|  |  | a≥3, 2≥4, ≥2 |
| BCPNN |  | IC025＞0 |
| EBGM |  | EGBM05＞2 |
