# Supplementary material for: The real-world safety of Pexidartinib: a pharmacovigilance analysis based on the FDA adverse event reporting system
Source: Research Square preprint supplement (doi:10.21203/rs.3.rs-6283844/v1), 2025-05-06
Supplement: Supplementary file 6 [file f3293b8b96385e69cd318741.xlsx]

## Sheet: Sheet1
Gender	PT	Cases(n)	ROR(95%CI)	PRR(χ2)	EBGM(EBGM05)	IC(IC025)
Male	Product Dose Omission Issue	136	7.6 ( 6.39 - 9.04 )	7.2 ( 730.36 )	7.18 ( 6.21 )	2.84 ( 2.59 )
	Fatigue	126	5.19 ( 4.34 - 6.22 )	4.95 ( 401.66 )	4.95 ( 4.26 )	2.31 ( 2.04 )
	Hair Colour Changes	118	520.65 ( 427.21 - 634.52 )	493.03 ( 50588.01 )	430.53 ( 364.86 )	8.75 ( 8.46 )
	Pruritus	58	4.93 ( 3.79 - 6.39 )	4.82 ( 176.46 )	4.82 ( 3.87 )	2.27 ( 1.89 )
	Nausea	41	2.37 ( 1.74 - 3.23 )	2.34 ( 31.79 )	2.34 ( 1.81 )	1.23 ( 0.78 )
	Product Dose Omission In Error	39	27.2 ( 19.79 - 37.37 )	26.74 ( 959.2 )	26.53 ( 20.34 )	4.73 ( 4.27 )
	Rash	38	2.69 ( 1.95 - 3.71 )	2.66 ( 39.58 )	2.66 ( 2.03 )	1.41 ( 0.94 )
	Aspartate Aminotransferase Increased	36	22.37 ( 16.08 - 31.13 )	22.03 ( 718.48 )	21.89 ( 16.6 )	4.45 ( 3.97 )
	Off Label Use	33	0.77 ( 0.55 - 1.09 )	0.78 ( 2.16 )	0.78 ( 0.58 )	-0.36 ( -0.86 )
	Arthralgia	32	2.59 ( 1.83 - 3.67 )	2.57 ( 30.73 )	2.56 ( 1.92 )	1.36 ( 0.85 )
	Product Use Issue	30	4.71 ( 3.29 - 6.76 )	4.66 ( 86.48 )	4.66 ( 3.45 )	2.22 ( 1.7 )
	Alanine Aminotransferase Increased	28	14.23 ( 9.79 - 20.67 )	14.06 ( 338.64 )	14.01 ( 10.25 )	3.81 ( 3.27 )
	Pain	26	1.02 ( 0.69 - 1.5 )	1.02 ( 0.01 )	1.02 ( 0.74 )	0.02 ( -0.53 )
	Diarrhoea	25	1.11 ( 0.75 - 1.65 )	1.11 ( 0.28 )	1.11 ( 0.8 )	0.15 ( -0.42 )
	No Adverse Event	25	4.76 ( 3.21 - 7.07 )	4.72 ( 73.42 )	4.72 ( 3.39 )	2.24 ( 1.67 )
	Hepatic Enzyme Increased	25	13.11 ( 8.83 - 19.45 )	12.97 ( 275.34 )	12.92 ( 9.29 )	3.69 ( 3.12 )
	Headache	23	1.66 ( 1.1 - 2.5 )	1.65 ( 5.95 )	1.65 ( 1.17 )	0.72 ( 0.13 )
	Therapy Cessation	23	9.93 ( 6.58 - 14.98 )	9.83 ( 182.19 )	9.81 ( 6.95 )	3.29 ( 2.7 )
	Somnolence	23	3.77 ( 2.5 - 5.69 )	3.75 ( 46.37 )	3.74 ( 2.65 )	1.9 ( 1.31 )
	Dizziness	21	1.53 ( 1 - 2.36 )	1.53 ( 3.86 )	1.53 ( 1.07 )	0.61 ( -0.01 )
Female	Fatigue	226	3.67 ( 3.21 - 4.2 )	3.54 ( 416.92 )	3.54 ( 3.16 )	1.82 ( 1.63 )
	Product Dose Omission Issue	202	5.09 ( 4.42 - 5.86 )	4.91 ( 633.26 )	4.9 ( 4.36 )	2.29 ( 2.09 )
	Hair Colour Changes	159	136.2 ( 115.84 - 160.14 )	131.46 ( 19631.41 )	125.38 ( 109.49 )	6.97 ( 6.73 )
	Nausea	151	2.49 ( 2.12 - 2.93 )	2.44 ( 130.45 )	2.44 ( 2.13 )	1.29 ( 1.05 )
	Pruritus	91	2.93 ( 2.38 - 3.61 )	2.89 ( 113.31 )	2.89 ( 2.43 )	1.53 ( 1.23 )
	Rash	77	2.26 ( 1.8 - 2.83 )	2.24 ( 53.06 )	2.24 ( 1.85 )	1.16 ( 0.83 )
	Diarrhoea	75	1.45 ( 1.15 - 1.82 )	1.44 ( 10.2 )	1.44 ( 1.19 )	0.53 ( 0.19 )
	Pain	70	1.22 ( 0.96 - 1.55 )	1.22 ( 2.74 )	1.22 ( 1 )	0.28 ( -0.06 )
	Alanine Aminotransferase Increased	69	22.43 ( 17.66 - 28.48 )	22.1 ( 1379.78 )	21.93 ( 17.96 )	4.45 ( 4.11 )
	Aspartate Aminotransferase Increased	69	26.99 ( 21.25 - 34.27 )	26.59 ( 1683.91 )	26.34 ( 21.57 )	4.72 ( 4.37 )
	Headache	58	1.14 ( 0.88 - 1.47 )	1.13 ( 0.92 )	1.13 ( 0.91 )	0.18 ( -0.2 )
	Arthralgia	52	1.37 ( 1.04 - 1.8 )	1.36 ( 5.06 )	1.36 ( 1.08 )	0.45 ( 0.05 )
	Off Label Use	51	0.67 ( 0.51 - 0.88 )	0.67 ( 8.16 )	0.67 ( 0.54 )	-0.57 ( -0.97 )
	Constipation	47	2.89 ( 2.17 - 3.86 )	2.87 ( 57.59 )	2.87 ( 2.26 )	1.52 ( 1.1 )
	Gamma-Glutamyltransferase Increased	46	45.04 ( 33.61 - 60.36 )	44.59 ( 1928.72 )	43.88 ( 34.34 )	5.46 ( 5.03 )
	Feeling Abnormal	44	2.53 ( 1.88 - 3.41 )	2.52 ( 40.44 )	2.52 ( 1.96 )	1.33 ( 0.9 )
	Blood Alkaline Phosphatase Increased	44	40.84 ( 30.28 - 55.08 )	40.45 ( 1668.19 )	39.87 ( 31.04 )	5.32 ( 4.88 )
	Product Dose Omission In Error	44	12.18 ( 9.04 - 16.4 )	12.07 ( 445.08 )	12.02 ( 9.37 )	3.59 ( 3.15 )
	Dizziness	43	1.25 ( 0.92 - 1.68 )	1.24 ( 2.07 )	1.24 ( 0.97 )	0.31 ( -0.12 )
	Vomiting	43	1.25 ( 0.93 - 1.69 )	1.25 ( 2.19 )	1.25 ( 0.97 )	0.32 ( -0.11 )
