# Supplementary material for: The real-world safety of Pexidartinib: a pharmacovigilance analysis based on the FDA adverse event reporting system
Source: Research Square preprint supplement (doi:10.21203/rs.3.rs-6283844/v1), 2025-05-06
Supplement: Supplementary file 7 [file f8deaee13766e3e86c6fd73c.xlsx]

## Sheet: Sheet1
PT	Cases(n)	ROR(95%CI)	PRR(χ2)	EBGM(EBGM05)	IC(IC025)
Fatigue	135	4.25 ( 3.57 - 5.05 )	4.1 ( 320.11 )	4.1 ( 3.55 )	2.04 ( 1.78 )
Hair Colour Changes	124	782.07 ( 642.42 - 952.09 )	750.65 ( 76916.09 )	622.08 ( 527.67 )	9.28 ( 9 )
Product Dose Omission Issue	109	5.82 ( 4.8 - 7.04 )	5.64 ( 418.58 )	5.64 ( 4.8 )	2.5 ( 2.21 )
Off Label Use	77	1.05 ( 0.84 - 1.32 )	1.05 ( 0.21 )	1.05 ( 0.87 )	0.07 ( -0.26 )
Nausea	73	2.23 ( 1.77 - 2.81 )	2.2 ( 48.3 )	2.2 ( 1.81 )	1.14 ( 0.8 )
Aspartate Aminotransferase Increased	69	21.43 ( 16.87 - 27.22 )	20.97 ( 1306.01 )	20.85 ( 17.07 )	4.38 ( 4.03 )
Pruritus	68	3.38 ( 2.66 - 4.3 )	3.33 ( 111.29 )	3.32 ( 2.72 )	1.73 ( 1.38 )
Alanine Aminotransferase Increased	64	16.34 ( 12.75 - 20.94 )	16.02 ( 898.58 )	15.96 ( 12.96 )	4 ( 3.63 )
Rash	61	2.46 ( 1.91 - 3.17 )	2.43 ( 51.85 )	2.43 ( 1.97 )	1.28 ( 0.91 )
Pain	44	1.97 ( 1.47 - 2.66 )	1.96 ( 20.86 )	1.96 ( 1.53 )	0.97 ( 0.54 )
Diarrhoea	44	1.38 ( 1.02 - 1.85 )	1.37 ( 4.45 )	1.37 ( 1.07 )	0.45 ( 0.02 )
No Adverse Event	44	4.34 ( 3.23 - 5.85 )	4.3 ( 111.55 )	4.29 ( 3.35 )	2.1 ( 1.67 )
Gamma-Glutamyltransferase Increased	43	34.11 ( 25.21 - 46.15 )	33.65 ( 1350.17 )	33.35 ( 25.89 )	5.06 ( 4.62 )
Blood Alkaline Phosphatase Increased	39	33.05 ( 24.07 - 45.39 )	32.65 ( 1186.14 )	32.36 ( 24.82 )	5.02 ( 4.56 )
Arthralgia	35	1.6 ( 1.15 - 2.24 )	1.6 ( 7.86 )	1.6 ( 1.21 )	0.67 ( 0.19 )
Headache	34	1.46 ( 1.04 - 2.04 )	1.45 ( 4.8 )	1.45 ( 1.09 )	0.54 ( 0.05 )
Feeling Abnormal	33	5.79 ( 4.11 - 8.16 )	5.74 ( 129.22 )	5.73 ( 4.3 )	2.52 ( 2.02 )
Decreased Appetite	30	2.83 ( 1.97 - 4.05 )	2.81 ( 35.04 )	2.81 ( 2.08 )	1.49 ( 0.97 )
Hepatic Enzyme Increased	30	6.54 ( 4.56 - 9.38 )	6.49 ( 139.23 )	6.48 ( 4.79 )	2.7 ( 2.17 )
Dizziness	29	1.61 ( 1.12 - 2.33 )	1.61 ( 6.69 )	1.61 ( 1.18 )	0.68 ( 0.15 )
Vomiting	29	1.38 ( 0.95 - 1.98 )	1.37 ( 2.95 )	1.37 ( 1.01 )	0.46 ( -0.07 )
Therapy Cessation	29	11.12 ( 7.71 - 16.04 )	11.02 ( 263.75 )	10.99 ( 8.09 )	3.46 ( 2.93 )
Blood Bilirubin Increased	26	17.4 ( 11.82 - 25.62 )	17.26 ( 396.6 )	17.18 ( 12.43 )	4.1 ( 3.54 )
Abdominal Discomfort	25	3.21 ( 2.16 - 4.76 )	3.19 ( 37.66 )	3.19 ( 2.29 )	1.67 ( 1.1 )
Constipation	24	2.7 ( 1.8 - 4.03 )	2.68 ( 25.38 )	2.68 ( 1.92 )	1.42 ( 0.84 )
Periorbital Swelling	23	53.38 ( 35.31 - 80.69 )	52.99 ( 1156.39 )	52.24 ( 36.97 )	5.71 ( 5.11 )
Disease Progression	22	2.14 ( 1.41 - 3.26 )	2.13 ( 13.31 )	2.13 ( 1.5 )	1.09 ( 0.49 )
Abdominal Pain Upper	21	2.91 ( 1.9 - 4.48 )	2.9 ( 26.2 )	2.9 ( 2.02 )	1.54 ( 0.92 )
Swelling Face	21	8.74 ( 5.68 - 13.42 )	8.68 ( 142.53 )	8.66 ( 6.05 )	3.12 ( 2.5 )
Somnolence	20	2.46 ( 1.59 - 3.82 )	2.45 ( 17.22 )	2.45 ( 1.7 )	1.29 ( 0.66 )
Treatment Noncompliance	20	6.49 ( 4.18 - 10.08 )	6.46 ( 92.18 )	6.45 ( 4.46 )	2.69 ( 2.06 )
Pain In Extremity	19	1.8 ( 1.15 - 2.82 )	1.79 ( 6.69 )	1.79 ( 1.23 )	0.84 ( 0.19 )
Alopecia	19	2.45 ( 1.56 - 3.84 )	2.44 ( 16.12 )	2.44 ( 1.67 )	1.28 ( 0.64 )
Liver Function Test Increased	19	10.09 ( 6.42 - 15.85 )	10.03 ( 154.22 )	10.01 ( 6.86 )	3.32 ( 2.68 )
Adverse Drug Reaction	19	5.5 ( 3.5 - 8.64 )	5.48 ( 69.48 )	5.47 ( 3.75 )	2.45 ( 1.8 )
Eye Swelling	18	14.71 ( 9.25 - 23.4 )	14.63 ( 227.77 )	14.58 ( 9.88 )	3.87 ( 3.2 )
Product Use Issue	18	1.78 ( 1.12 - 2.82 )	1.77 ( 6.08 )	1.77 ( 1.2 )	0.83 ( 0.16 )
Skin Discolouration	18	11.29 ( 7.1 - 17.96 )	11.23 ( 167.35 )	11.2 ( 7.6 )	3.49 ( 2.82 )
Malaise	18	1.11 ( 0.7 - 1.77 )	1.11 ( 0.21 )	1.11 ( 0.76 )	0.16 ( -0.51 )
Covid-19	18	0.96 ( 0.61 - 1.53 )	0.96 ( 0.03 )	0.96 ( 0.65 )	-0.06 ( -0.72 )
Incorrect Dose Administered	18	2.66 ( 1.67 - 4.23 )	2.65 ( 18.54 )	2.65 ( 1.8 )	1.41 ( 0.74 )
Hypertension	17	1.55 ( 0.96 - 2.5 )	1.55 ( 3.32 )	1.55 ( 1.04 )	0.63 ( -0.05 )
Asthenia	16	1.05 ( 0.64 - 1.72 )	1.05 ( 0.04 )	1.05 ( 0.7 )	0.07 ( -0.63 )
Pyrexia	16	0.79 ( 0.48 - 1.28 )	0.79 ( 0.94 )	0.79 ( 0.52 )	-0.35 ( -1.05 )
Dyspepsia	16	4.62 ( 2.83 - 7.55 )	4.6 ( 45.09 )	4.6 ( 3.05 )	2.2 ( 1.5 )
Memory Impairment	14	3.59 ( 2.12 - 6.07 )	3.58 ( 25.99 )	3.57 ( 2.3 )	1.84 ( 1.09 )
Blood Pressure Increased	14	1.9 ( 1.12 - 3.21 )	1.89 ( 5.93 )	1.89 ( 1.22 )	0.92 ( 0.17 )
Therapy Interrupted	14	2.83 ( 1.67 - 4.78 )	2.82 ( 16.45 )	2.82 ( 1.82 )	1.49 ( 0.75 )
Cough	13	1.01 ( 0.59 - 1.75 )	1.01 ( 0 )	1.01 ( 0.64 )	0.02 ( -0.75 )
Back Pain	13	1.43 ( 0.83 - 2.46 )	1.42 ( 1.65 )	1.42 ( 0.9 )	0.51 ( -0.26 )
Taste Disorder	13	9.08 ( 5.26 - 15.67 )	9.05 ( 92.89 )	9.03 ( 5.72 )	3.17 ( 2.4 )
Anxiety	13	1.63 ( 0.94 - 2.81 )	1.63 ( 3.14 )	1.63 ( 1.03 )	0.7 ( -0.07 )
White Blood Cell Count Decreased	13	1.89 ( 1.09 - 3.26 )	1.88 ( 5.41 )	1.88 ( 1.19 )	0.91 ( 0.14 )
Dysgeusia	13	6.35 ( 3.68 - 10.96 )	6.33 ( 58.27 )	6.32 ( 4 )	2.66 ( 1.89 )
Surgery	13	6.24 ( 3.62 - 10.76 )	6.22 ( 56.86 )	6.21 ( 3.93 )	2.63 ( 1.86 )
Paraesthesia	12	1.67 ( 0.95 - 2.95 )	1.67 ( 3.23 )	1.67 ( 1.04 )	0.74 ( -0.06 )
Weight Increased	12	1.23 ( 0.7 - 2.17 )	1.23 ( 0.52 )	1.23 ( 0.77 )	0.3 ( -0.5 )
Joint Swelling	12	1.48 ( 0.84 - 2.61 )	1.48 ( 1.85 )	1.48 ( 0.92 )	0.56 ( -0.24 )
Hypersensitivity	12	1.4 ( 0.79 - 2.47 )	1.4 ( 1.36 )	1.4 ( 0.87 )	0.48 ( -0.32 )
Swelling	11	2.03 ( 1.12 - 3.67 )	2.03 ( 5.72 )	2.03 ( 1.23 )	1.02 ( 0.18 )
Liver Function Test Abnormal	11	10.94 ( 6.05 - 19.79 )	10.9 ( 98.69 )	10.87 ( 6.62 )	3.44 ( 2.61 )
Abdominal Pain	10	0.83 ( 0.45 - 1.54 )	0.83 ( 0.35 )	0.83 ( 0.49 )	-0.27 ( -1.14 )
Bilirubin Conjugated Increased	10	87.66 ( 46.77 - 164.29 )	87.38 ( 833.82 )	85.34 ( 50.45 )	6.42 ( 5.53 )
Peripheral Swelling	10	1.18 ( 0.63 - 2.19 )	1.18 ( 0.27 )	1.18 ( 0.7 )	0.24 ( -0.63 )
Drug Ineffective	10	0.16 ( 0.08 - 0.29 )	0.16 ( 44.71 )	0.16 ( 0.1 )	-2.64 ( -3.51 )
Erythema	10	1.11 ( 0.6 - 2.06 )	1.11 ( 0.1 )	1.11 ( 0.66 )	0.15 ( -0.72 )
Abdominal Distension	9	2.33 ( 1.21 - 4.49 )	2.33 ( 6.82 )	2.33 ( 1.35 )	1.22 ( 0.3 )
Influenza	9	2.02 ( 1.05 - 3.88 )	2.01 ( 4.59 )	2.01 ( 1.16 )	1.01 ( 0.09 )
Dehydration	9	1.71 ( 0.89 - 3.3 )	1.71 ( 2.67 )	1.71 ( 0.99 )	0.78 ( -0.14 )
Dry Mouth	9	3.38 ( 1.75 - 6.5 )	3.37 ( 14.99 )	3.37 ( 1.95 )	1.75 ( 0.84 )
Dry Skin	9	1.72 ( 0.89 - 3.31 )	1.72 ( 2.7 )	1.72 ( 0.99 )	0.78 ( -0.13 )
Flatulence	9	5.84 ( 3.03 - 11.24 )	5.82 ( 35.93 )	5.82 ( 3.36 )	2.54 ( 1.63 )
Depression	9	1.41 ( 0.73 - 2.72 )	1.41 ( 1.08 )	1.41 ( 0.82 )	0.5 ( -0.42 )
Weight Decreased	9	0.76 ( 0.4 - 1.46 )	0.76 ( 0.68 )	0.76 ( 0.44 )	-0.39 ( -1.31 )
Laboratory Test Abnormal	9	6.32 ( 3.28 - 12.17 )	6.31 ( 40.12 )	6.3 ( 3.64 )	2.65 ( 1.74 )
Product Dose Omission In Error	9	4.39 ( 2.28 - 8.44 )	4.38 ( 23.42 )	4.37 ( 2.53 )	2.13 ( 1.21 )
Thirst	8	9.3 ( 4.64 - 18.63 )	9.28 ( 58.97 )	9.26 ( 5.18 )	3.21 ( 2.25 )
Dyspnoea	8	0.3 ( 0.15 - 0.6 )	0.3 ( 13.1 )	0.3 ( 0.17 )	-1.73 ( -2.7 )
Visual Impairment	8	1.98 ( 0.99 - 3.97 )	1.98 ( 3.89 )	1.98 ( 1.11 )	0.99 ( 0.02 )
Hypoaesthesia	8	1.38 ( 0.69 - 2.76 )	1.38 ( 0.83 )	1.38 ( 0.77 )	0.46 ( -0.5 )
Therapeutic Response Unexpected	8	7.07 ( 3.53 - 14.16 )	7.06 ( 41.52 )	7.04 ( 3.94 )	2.82 ( 1.85 )
Burning Sensation	7	3.15 ( 1.5 - 6.62 )	3.15 ( 10.25 )	3.14 ( 1.69 )	1.65 ( 0.63 )
Chills	7	1.27 ( 0.61 - 2.67 )	1.27 ( 0.41 )	1.27 ( 0.68 )	0.35 ( -0.67 )
Illness	7	1.24 ( 0.59 - 2.59 )	1.23 ( 0.31 )	1.23 ( 0.66 )	0.3 ( -0.72 )
Rash Pruritic	7	2.54 ( 1.21 - 5.34 )	2.54 ( 6.52 )	2.54 ( 1.36 )	1.34 ( 0.32 )
Contusion	7	1.86 ( 0.89 - 3.9 )	1.86 ( 2.77 )	1.86 ( 1 )	0.89 ( -0.13 )
Photosensitivity Reaction	7	9.15 ( 4.35 - 19.23 )	9.13 ( 50.57 )	9.11 ( 4.89 )	3.19 ( 2.16 )
Nasopharyngitis	7	0.85 ( 0.4 - 1.78 )	0.85 ( 0.19 )	0.85 ( 0.46 )	-0.24 ( -1.26 )
Sunburn	7	39.87 ( 18.92 - 84.05 )	39.78 ( 261.81 )	39.36 ( 21.09 )	5.3 ( 4.27 )
Ageusia	7	8.82 ( 4.2 - 18.53 )	8.8 ( 48.3 )	8.78 ( 4.72 )	3.13 ( 2.11 )
Sinusitis	7	1.36 ( 0.65 - 2.85 )	1.36 ( 0.66 )	1.36 ( 0.73 )	0.44 ( -0.58 )
Insomnia	7	0.9 ( 0.43 - 1.89 )	0.9 ( 0.08 )	0.9 ( 0.48 )	-0.15 ( -1.18 )
Drug Intolerance	6	0.7 ( 0.32 - 1.57 )	0.71 ( 0.74 )	0.71 ( 0.36 )	-0.5 ( -1.6 )
Blood Iron Decreased	6	11.12 ( 4.99 - 24.8 )	11.1 ( 54.98 )	11.07 ( 5.66 )	3.47 ( 2.37 )
Nervousness	6	5.83 ( 2.62 - 13 )	5.82 ( 23.93 )	5.81 ( 2.97 )	2.54 ( 1.45 )
Urinary Tract Infection	6	0.73 ( 0.33 - 1.63 )	0.73 ( 0.59 )	0.73 ( 0.37 )	-0.45 ( -1.54 )
Eye Oedema	6	51.78 ( 23.11 - 116 )	51.68 ( 294.01 )	50.97 ( 25.95 )	5.67 ( 4.57 )
Muscle Spasms	6	0.94 ( 0.42 - 2.09 )	0.94 ( 0.02 )	0.94 ( 0.48 )	-0.09 ( -1.18 )
Anaemia	6	0.49 ( 0.22 - 1.09 )	0.49 ( 3.2 )	0.49 ( 0.25 )	-1.03 ( -2.12 )
Body Temperature Increased	6	5.08 ( 2.28 - 11.32 )	5.07 ( 19.59 )	5.06 ( 2.59 )	2.34 ( 1.25 )
Therapy Change	6	10.38 ( 4.65 - 23.15 )	10.36 ( 50.61 )	10.33 ( 5.28 )	3.37 ( 2.28 )
Confusional State	5	0.66 ( 0.28 - 1.6 )	0.67 ( 0.84 )	0.67 ( 0.32 )	-0.59 ( -1.77 )
Blood Glucose Decreased	5	7.66 ( 3.18 - 18.43 )	7.65 ( 28.83 )	7.63 ( 3.66 )	2.93 ( 1.75 )
Urticaria	5	0.6 ( 0.25 - 1.45 )	0.61 ( 1.29 )	0.61 ( 0.29 )	-0.72 ( -1.9 )
Face Oedema	5	4.79 ( 1.99 - 11.52 )	4.78 ( 14.94 )	4.78 ( 2.29 )	2.26 ( 1.08 )
Lacrimation Increased	5	4.11 ( 1.71 - 9.88 )	4.1 ( 11.72 )	4.1 ( 1.97 )	2.04 ( 0.86 )
Chest Pain	5	0.7 ( 0.29 - 1.69 )	0.7 ( 0.63 )	0.7 ( 0.34 )	-0.51 ( -1.69 )
Blood Glucose Increased	5	1.55 ( 0.65 - 3.73 )	1.55 ( 0.98 )	1.55 ( 0.74 )	0.63 ( -0.55 )
Tumour Pain	5	60.94 ( 25.16 - 147.59 )	60.84 ( 289.44 )	59.85 ( 28.55 )	5.9 ( 4.71 )
Hepatotoxicity	5	2.25 ( 0.94 - 5.41 )	2.25 ( 3.46 )	2.25 ( 1.08 )	1.17 ( -0.01 )
Lethargy	5	2.38 ( 0.99 - 5.73 )	2.38 ( 3.99 )	2.38 ( 1.14 )	1.25 ( 0.07 )
Hepatic Enzyme Abnormal	5	18.34 ( 7.61 - 44.2 )	18.31 ( 81.44 )	18.23 ( 8.73 )	4.19 ( 3.01 )
Neutropenia	5	0.34 ( 0.14 - 0.81 )	0.34 ( 6.59 )	0.34 ( 0.16 )	-1.57 ( -2.75 )
Tumour Excision	5	150.08 ( 61.31 - 367.36 )	149.84 ( 709.9 )	143.93 ( 68.06 )	7.17 ( 5.96 )
Vision Blurred	5	1.06 ( 0.44 - 2.54 )	1.06 ( 0.01 )	1.06 ( 0.51 )	0.08 ( -1.1 )
Adverse Event	5	1.55 ( 0.65 - 3.74 )	1.55 ( 0.99 )	1.55 ( 0.75 )	0.64 ( -0.54 )
Rotator Cuff Syndrome	5	15.84 ( 6.58 - 38.17 )	15.82 ( 69.13 )	15.76 ( 7.55 )	3.98 ( 2.8 )
Haematochezia	5	1.41 ( 0.59 - 3.4 )	1.41 ( 0.6 )	1.41 ( 0.68 )	0.5 ( -0.68 )
Liver Disorder	4	1.73 ( 0.65 - 4.6 )	1.73 ( 1.22 )	1.72 ( 0.76 )	0.79 ( -0.51 )
Amnesia	4	2.52 ( 0.94 - 6.72 )	2.52 ( 3.65 )	2.52 ( 1.11 )	1.33 ( 0.04 )
Cognitive Disorder	4	1.84 ( 0.69 - 4.9 )	1.84 ( 1.53 )	1.84 ( 0.81 )	0.88 ( -0.41 )
Depressed Mood	4	2.01 ( 0.75 - 5.35 )	2 ( 2.01 )	2 ( 0.88 )	1 ( -0.29 )
Fall	4	0.3 ( 0.11 - 0.8 )	0.3 ( 6.6 )	0.3 ( 0.13 )	-1.74 ( -3.03 )
Haemoglobin Decreased	4	0.83 ( 0.31 - 2.21 )	0.83 ( 0.14 )	0.83 ( 0.37 )	-0.27 ( -1.56 )
Skin Exfoliation	4	1.13 ( 0.42 - 3.02 )	1.13 ( 0.06 )	1.13 ( 0.5 )	0.18 ( -1.11 )
Hepatitis A	4	89.1 ( 33.02 - 240.41 )	88.98 ( 339.65 )	86.88 ( 37.86 )	6.44 ( 5.13 )
Influenza Like Illness	4	1.86 ( 0.7 - 4.96 )	1.86 ( 1.58 )	1.86 ( 0.82 )	0.89 ( -0.4 )
Liver Injury	4	1.9 ( 0.71 - 5.07 )	1.9 ( 1.71 )	1.9 ( 0.84 )	0.93 ( -0.36 )
Bone Pain	4	1.97 ( 0.74 - 5.25 )	1.97 ( 1.91 )	1.97 ( 0.87 )	0.98 ( -0.32 )
Mood Altered	4	4.44 ( 1.66 - 11.83 )	4.43 ( 10.62 )	4.43 ( 1.95 )	2.15 ( 0.85 )
Oedema Peripheral	4	0.76 ( 0.28 - 2.02 )	0.76 ( 0.31 )	0.76 ( 0.33 )	-0.4 ( -1.69 )
Gastrooesophageal Reflux Disease	4	1.46 ( 0.55 - 3.89 )	1.46 ( 0.57 )	1.46 ( 0.64 )	0.54 ( -0.75 )
Migraine	4	1.16 ( 0.44 - 3.09 )	1.16 ( 0.09 )	1.16 ( 0.51 )	0.21 ( -1.08 )
Blood Test Abnormal	4	5.47 ( 2.05 - 14.6 )	5.47 ( 14.57 )	5.46 ( 2.4 )	2.45 ( 1.16 )
Colitis	4	1.46 ( 0.55 - 3.9 )	1.46 ( 0.58 )	1.46 ( 0.64 )	0.55 ( -0.74 )
Eructation	4	10.98 ( 4.11 - 29.31 )	10.96 ( 36.11 )	10.93 ( 4.81 )	3.45 ( 2.16 )
Death	4	0.1 ( 0.04 - 0.27 )	0.1 ( 32.46 )	0.1 ( 0.04 )	-3.31 ( -4.6 )
Seasonal Allergy	4	5.66 ( 2.12 - 15.1 )	5.65 ( 15.3 )	5.65 ( 2.48 )	2.5 ( 1.2 )
Gout	4	5.42 ( 2.03 - 14.47 )	5.42 ( 14.39 )	5.41 ( 2.38 )	2.44 ( 1.14 )
Hunger	4	16.34 ( 6.11 - 43.65 )	16.32 ( 57.25 )	16.25 ( 7.14 )	4.02 ( 2.73 )
Dysphagia	4	0.94 ( 0.35 - 2.5 )	0.94 ( 0.02 )	0.94 ( 0.41 )	-0.09 ( -1.38 )
Transaminases Increased	4	2.21 ( 0.83 - 5.88 )	2.2 ( 2.63 )	2.2 ( 0.97 )	1.14 ( -0.15 )
Seizure	4	0.57 ( 0.21 - 1.52 )	0.57 ( 1.3 )	0.57 ( 0.25 )	-0.81 ( -2.1 )
Enzyme Level Increased	4	99.47 ( 36.82 - 268.77 )	99.35 ( 379.04 )	96.72 ( 42.11 )	6.6 ( 5.28 )
Drug Interaction	4	0.35 ( 0.13 - 0.95 )	0.36 ( 4.68 )	0.36 ( 0.16 )	-1.49 ( -2.78 )
Accidental Underdose	4	17.54 ( 6.56 - 46.87 )	17.52 ( 62 )	17.44 ( 7.66 )	4.12 ( 2.83 )
Skin Hypopigmentation	4	50.25 ( 18.72 - 134.89 )	50.19 ( 190.21 )	49.52 ( 21.67 )	5.63 ( 4.33 )
Nephrolithiasis	4	2 ( 0.75 - 5.33 )	2 ( 1.99 )	2 ( 0.88 )	1 ( -0.29 )
Eye Irritation	3	1.72 ( 0.56 - 5.35 )	1.72 ( 0.91 )	1.72 ( 0.67 )	0.78 ( -0.66 )
Eye Pruritus	3	1.67 ( 0.54 - 5.17 )	1.67 ( 0.8 )	1.67 ( 0.65 )	0.74 ( -0.71 )
Arthropathy	3	0.81 ( 0.26 - 2.52 )	0.81 ( 0.13 )	0.81 ( 0.32 )	-0.3 ( -1.74 )
Chest Discomfort	3	0.58 ( 0.19 - 1.81 )	0.58 ( 0.9 )	0.58 ( 0.23 )	-0.78 ( -2.22 )
Rash Erythematous	3	1.17 ( 0.38 - 3.64 )	1.17 ( 0.08 )	1.17 ( 0.46 )	0.23 ( -1.21 )
Lip Swelling	3	2.05 ( 0.66 - 6.35 )	2.04 ( 1.6 )	2.04 ( 0.79 )	1.03 ( -0.41 )
Dysmenorrhoea	3	12.32 ( 3.96 - 38.28 )	12.31 ( 31.06 )	12.27 ( 4.75 )	3.62 ( 2.17 )
Fluid Retention	3	1.57 ( 0.51 - 4.88 )	1.57 ( 0.63 )	1.57 ( 0.61 )	0.65 ( -0.79 )
Swelling Of Eyelid	3	6.47 ( 2.08 - 20.1 )	6.47 ( 13.84 )	6.46 ( 2.5 )	2.69 ( 1.25 )
Ear Pain	3	3.31 ( 1.07 - 10.27 )	3.31 ( 4.83 )	3.31 ( 1.28 )	1.72 ( 0.28 )
Product Availability Issue	3	3 ( 0.97 - 9.32 )	3 ( 4 )	3 ( 1.16 )	1.58 ( 0.14 )
Micturition Urgency	3	7.15 ( 2.3 - 22.22 )	7.15 ( 15.83 )	7.14 ( 2.76 )	2.83 ( 1.39 )
Dry Eye	3	1.07 ( 0.35 - 3.33 )	1.07 ( 0.02 )	1.07 ( 0.42 )	0.1 ( -1.34 )
Neoplasm	3	5.83 ( 1.88 - 18.09 )	5.82 ( 11.96 )	5.81 ( 2.25 )	2.54 ( 1.09 )
Blood Cholesterol Increased	3	1.56 ( 0.5 - 4.84 )	1.56 ( 0.6 )	1.56 ( 0.6 )	0.64 ( -0.8 )
Ill-Defined Disorder	3	0.85 ( 0.27 - 2.63 )	0.85 ( 0.08 )	0.85 ( 0.33 )	-0.24 ( -1.68 )
Abdominal Pain Lower	3	2.57 ( 0.83 - 7.97 )	2.57 ( 2.87 )	2.57 ( 0.99 )	1.36 ( -0.08 )
Infection	3	0.33 ( 0.11 - 1.03 )	0.33 ( 4.01 )	0.33 ( 0.13 )	-1.59 ( -3.03 )
Thrombosis	3	0.95 ( 0.31 - 2.96 )	0.95 ( 0.01 )	0.95 ( 0.37 )	-0.07 ( -1.51 )
Insurance Issue	3	3.93 ( 1.27 - 12.21 )	3.93 ( 6.55 )	3.93 ( 1.52 )	1.97 ( 0.53 )
Intentional Dose Omission	3	1.95 ( 0.63 - 6.04 )	1.95 ( 1.38 )	1.95 ( 0.75 )	0.96 ( -0.48 )
Blood Lactate Dehydrogenase Increased	3	3.28 ( 1.06 - 10.19 )	3.28 ( 4.76 )	3.28 ( 1.27 )	1.71 ( 0.27 )
Tremor	3	0.53 ( 0.17 - 1.65 )	0.53 ( 1.23 )	0.53 ( 0.21 )	-0.91 ( -2.35 )
Faeces Soft	3	6.72 ( 2.16 - 20.87 )	6.72 ( 14.57 )	6.7 ( 2.6 )	2.75 ( 1.3 )
Skin Burning Sensation	3	2.43 ( 0.78 - 7.56 )	2.43 ( 2.53 )	2.43 ( 0.94 )	1.28 ( -0.16 )
Jaundice	3	2.4 ( 0.77 - 7.45 )	2.4 ( 2.45 )	2.4 ( 0.93 )	1.26 ( -0.18 )
Neuralgia	3	2.74 ( 0.88 - 8.5 )	2.74 ( 3.31 )	2.74 ( 1.06 )	1.45 ( 0.01 )
Eye Colour Change	3	83.12 ( 26.45 - 261.21 )	83.04 ( 237.72 )	81.2 ( 31.15 )	6.34 ( 4.88 )
Pigmentation Disorder	3	10.78 ( 3.47 - 33.5 )	10.77 ( 26.51 )	10.74 ( 4.16 )	3.43 ( 1.98 )
Neck Pain	3	1.37 ( 0.44 - 4.25 )	1.37 ( 0.3 )	1.37 ( 0.53 )	0.45 ( -0.99 )
Hospitalisation	3	0.33 ( 0.1 - 1.01 )	0.33 ( 4.18 )	0.33 ( 0.13 )	-1.62 ( -3.06 )
Dysuria	3	2.15 ( 0.69 - 6.67 )	2.15 ( 1.84 )	2.15 ( 0.83 )	1.1 ( -0.34 )
Sleep Disorder	3	0.8 ( 0.26 - 2.49 )	0.8 ( 0.15 )	0.8 ( 0.31 )	-0.32 ( -1.76 )
Blood Triglycerides Increased	3	5.4 ( 1.74 - 16.77 )	5.4 ( 10.73 )	5.39 ( 2.09 )	2.43 ( 0.99 )
Blood Calcium Increased	3	10.83 ( 3.49 - 33.67 )	10.82 ( 26.67 )	10.79 ( 4.18 )	3.43 ( 1.99 )
Blood Creatine Phosphokinase Increased	3	1.82 ( 0.59 - 5.64 )	1.82 ( 1.1 )	1.82 ( 0.7 )	0.86 ( -0.58 )
Blood Creatinine Increased	3	0.83 ( 0.27 - 2.56 )	0.83 ( 0.11 )	0.83 ( 0.32 )	-0.27 ( -1.72 )
Myalgia	3	0.45 ( 0.14 - 1.38 )	0.45 ( 2.07 )	0.45 ( 0.17 )	-1.16 ( -2.61 )
Gait Disturbance	3	0.48 ( 0.15 - 1.49 )	0.48 ( 1.69 )	0.48 ( 0.19 )	-1.06 ( -2.5 )
Cardiac Disorder	3	1.2 ( 0.39 - 3.73 )	1.2 ( 0.1 )	1.2 ( 0.47 )	0.26 ( -1.18 )
Arthritis	3	0.87 ( 0.28 - 2.68 )	0.87 ( 0.06 )	0.87 ( 0.34 )	-0.21 ( -1.65 )
Disturbance In Attention	3	1.8 ( 0.58 - 5.58 )	1.8 ( 1.06 )	1.8 ( 0.7 )	0.85 ( -0.6 )
Mood Swings	3	4.47 ( 1.44 - 13.87 )	4.47 ( 8.06 )	4.46 ( 1.73 )	2.16 ( 0.71 )
Therapy Non-Responder	3	0.66 ( 0.21 - 2.05 )	0.66 ( 0.53 )	0.66 ( 0.26 )	-0.6 ( -2.04 )
Emotional Disorder	3	4.69 ( 1.51 - 14.57 )	4.69 ( 8.7 )	4.68 ( 1.82 )	2.23 ( 0.78 )
Emotional Distress	3	3.89 ( 1.25 - 12.07 )	3.89 ( 6.43 )	3.88 ( 1.51 )	1.96 ( 0.51 )
Hypersomnia	3	3.6 ( 1.16 - 11.19 )	3.6 ( 5.64 )	3.6 ( 1.4 )	1.85 ( 0.4 )
Hypertransaminasaemia	3	3.32 ( 1.07 - 10.32 )	3.32 ( 4.87 )	3.32 ( 1.29 )	1.73 ( 0.29 )
Drug Monitoring Procedure Not Performed	3	19.91 ( 6.4 - 61.95 )	19.89 ( 53.52 )	19.78 ( 7.65 )	4.31 ( 2.86 )
Drug-Induced Liver Injury	3	0.9 ( 0.29 - 2.81 )	0.9 ( 0.03 )	0.9 ( 0.35 )	-0.14 ( -1.59 )
Bacterial Infection	2	1.86 ( 0.46 - 7.43 )	1.86 ( 0.79 )	1.86 ( 0.58 )	0.89 ( -0.77 )
Vitreous Floaters	2	4.46 ( 1.11 - 17.84 )	4.45 ( 5.35 )	4.45 ( 1.39 )	2.15 ( 0.49 )
Abdominal Tenderness	2	8.04 ( 2.01 - 32.23 )	8.04 ( 12.3 )	8.02 ( 2.51 )	3 ( 1.33 )
Hiccups	2	5.94 ( 1.48 - 23.8 )	5.94 ( 8.2 )	5.93 ( 1.86 )	2.57 ( 0.9 )
Appetite Disorder	2	7.66 ( 1.91 - 30.7 )	7.66 ( 11.55 )	7.64 ( 2.39 )	2.93 ( 1.27 )
Chromaturia	2	2.7 ( 0.68 - 10.82 )	2.7 ( 2.14 )	2.7 ( 0.85 )	1.43 ( -0.23 )
Glassy Eyes	2	94.25 ( 23.14 - 383.81 )	94.18 ( 179.72 )	91.83 ( 28.36 )	6.52 ( 4.82 )
Knee Arthroplasty	2	2.09 ( 0.52 - 8.36 )	2.09 ( 1.13 )	2.09 ( 0.65 )	1.06 ( -0.61 )
Tinnitus	2	1.32 ( 0.33 - 5.28 )	1.32 ( 0.15 )	1.32 ( 0.41 )	0.4 ( -1.27 )
Vertigo	2	0.87 ( 0.22 - 3.49 )	0.87 ( 0.04 )	0.87 ( 0.27 )	-0.2 ( -1.87 )
Hot Flush	2	0.91 ( 0.23 - 3.64 )	0.91 ( 0.02 )	0.91 ( 0.29 )	-0.14 ( -1.8 )
Peripheral Coldness	2	3.84 ( 0.96 - 15.36 )	3.84 ( 4.19 )	3.83 ( 1.2 )	1.94 ( 0.27 )
Pollakiuria	2	1.68 ( 0.42 - 6.71 )	1.68 ( 0.55 )	1.68 ( 0.53 )	0.75 ( -0.92 )
Renal Impairment	2	0.34 ( 0.09 - 1.37 )	0.34 ( 2.52 )	0.34 ( 0.11 )	-1.54 ( -3.21 )
Asthma	2	0.3 ( 0.08 - 1.2 )	0.3 ( 3.24 )	0.3 ( 0.09 )	-1.73 ( -3.4 )
Coronavirus Infection	2	2.27 ( 0.57 - 9.1 )	2.27 ( 1.42 )	2.27 ( 0.71 )	1.18 ( -0.48 )
Panic Attack	2	2.29 ( 0.57 - 9.15 )	2.28 ( 1.44 )	2.28 ( 0.72 )	1.19 ( -0.48 )
Muscle Twitching	2	2.55 ( 0.64 - 10.22 )	2.55 ( 1.89 )	2.55 ( 0.8 )	1.35 ( -0.32 )
Flushing	2	0.56 ( 0.14 - 2.26 )	0.56 ( 0.67 )	0.56 ( 0.18 )	-0.83 ( -2.49 )
Hair Growth Abnormal	2	15.61 ( 3.89 - 62.61 )	15.6 ( 27.2 )	15.53 ( 4.86 )	3.96 ( 2.29 )
Joint Stiffness	2	1.66 ( 0.42 - 6.65 )	1.66 ( 0.53 )	1.66 ( 0.52 )	0.73 ( -0.94 )
Menstrual Disorder	2	8.75 ( 2.18 - 35.07 )	8.75 ( 13.69 )	8.73 ( 2.73 )	3.13 ( 1.46 )
Haematocrit Decreased	2	2.09 ( 0.52 - 8.37 )	2.09 ( 1.14 )	2.09 ( 0.65 )	1.06 ( -0.6 )
Menstruation Delayed	2	18.85 ( 4.69 - 75.67 )	18.84 ( 33.61 )	18.74 ( 5.86 )	4.23 ( 2.56 )
Red Blood Cell Count Decreased	2	1.41 ( 0.35 - 5.63 )	1.41 ( 0.23 )	1.41 ( 0.44 )	0.49 ( -1.18 )
Sensitive Skin	2	8.71 ( 2.17 - 34.91 )	8.71 ( 13.61 )	8.69 ( 2.72 )	3.12 ( 1.45 )
Impaired Healing	2	1.14 ( 0.28 - 4.55 )	1.14 ( 0.03 )	1.14 ( 0.36 )	0.19 ( -1.48 )
Joint Range Of Motion Decreased	2	2.78 ( 0.7 - 11.13 )	2.78 ( 2.28 )	2.78 ( 0.87 )	1.47 ( -0.19 )
Acne	2	1.3 ( 0.32 - 5.2 )	1.3 ( 0.14 )	1.3 ( 0.41 )	0.38 ( -1.29 )
Metastases To Central Nervous System	2	2.12 ( 0.53 - 8.5 )	2.12 ( 1.19 )	2.12 ( 0.67 )	1.09 ( -0.58 )
Metastases To Liver	2	1.62 ( 0.4 - 6.48 )	1.62 ( 0.47 )	1.62 ( 0.51 )	0.69 ( -0.97 )
Renal Injury	2	4.62 ( 1.15 - 18.48 )	4.61 ( 5.65 )	4.61 ( 1.44 )	2.2 ( 0.54 )
Eyelash Discolouration	2	453.56 ( 104.24 - 1973.47 )	453.26 ( 802.25 )	403.01 ( 117.76 )	8.65 ( 6.86 )
Musculoskeletal Chest Pain	2	3.16 ( 0.79 - 12.67 )	3.16 ( 2.96 )	3.16 ( 0.99 )	1.66 ( -0.01 )
Lymphadenopathy	2	1.07 ( 0.27 - 4.29 )	1.07 ( 0.01 )	1.07 ( 0.34 )	0.1 ( -1.57 )
Cholelithiasis	2	1.78 ( 0.45 - 7.14 )	1.78 ( 0.69 )	1.78 ( 0.56 )	0.83 ( -0.83 )
Bone Erosion	2	5.64 ( 1.41 - 22.6 )	5.64 ( 7.62 )	5.63 ( 1.76 )	2.49 ( 0.83 )
Abnormal Faeces	2	5.95 ( 1.49 - 23.82 )	5.94 ( 8.21 )	5.94 ( 1.86 )	2.57 ( 0.9 )
Night Sweats	2	1.41 ( 0.35 - 5.66 )	1.41 ( 0.24 )	1.41 ( 0.44 )	0.5 ( -1.17 )
Eating Disorder	2	2.57 ( 0.64 - 10.28 )	2.57 ( 1.91 )	2.57 ( 0.8 )	1.36 ( -0.31 )
Liver Function Test Decreased	2	93.04 ( 22.85 - 378.81 )	92.98 ( 177.43 )	90.68 ( 28.01 )	6.5 ( 4.81 )
Staphylococcal Infection	2	1.33 ( 0.33 - 5.31 )	1.33 ( 0.16 )	1.33 ( 0.42 )	0.41 ( -1.26 )
Investigation Noncompliance	2	190.97 ( 46.05 - 791.95 )	190.85 ( 358.82 )	181.36 ( 55.16 )	7.5 ( 5.78 )
Eye Infection	2	3.73 ( 0.93 - 14.94 )	3.73 ( 3.99 )	3.73 ( 1.17 )	1.9 ( 0.23 )
Retching	2	3.51 ( 0.88 - 14.04 )	3.51 ( 3.58 )	3.5 ( 1.1 )	1.81 ( 0.14 )
Pallor	2	0.96 ( 0.24 - 3.85 )	0.96 ( 0 )	0.96 ( 0.3 )	-0.06 ( -1.72 )
Platelet Count Decreased	2	0.32 ( 0.08 - 1.28 )	0.32 ( 2.9 )	0.32 ( 0.1 )	-1.65 ( -3.31 )
Rectal Haemorrhage	2	0.98 ( 0.25 - 3.93 )	0.98 ( 0 )	0.98 ( 0.31 )	-0.02 ( -1.69 )
Cardiac Flutter	2	11.82 ( 2.95 - 47.38 )	11.81 ( 19.73 )	11.78 ( 3.68 )	3.56 ( 1.89 )
Hepatic Failure	2	1.21 ( 0.3 - 4.85 )	1.21 ( 0.07 )	1.21 ( 0.38 )	0.28 ( -1.39 )
Eczema	2	0.5 ( 0.13 - 2 )	0.5 ( 0.99 )	0.5 ( 0.16 )	-1 ( -2.66 )
Mental Impairment	2	2.65 ( 0.66 - 10.62 )	2.65 ( 2.06 )	2.65 ( 0.83 )	1.41 ( -0.26 )
Nail Discolouration	2	12.45 ( 3.1 - 49.91 )	12.44 ( 20.97 )	12.4 ( 3.88 )	3.63 ( 1.96 )
Disorientation	2	1.29 ( 0.32 - 5.16 )	1.29 ( 0.13 )	1.29 ( 0.4 )	0.37 ( -1.3 )
Skin Lesion	2	1.2 ( 0.3 - 4.8 )	1.2 ( 0.07 )	1.2 ( 0.38 )	0.26 ( -1.4 )
Blood Potassium Decreased	2	1.75 ( 0.44 - 7 )	1.75 ( 0.64 )	1.75 ( 0.55 )	0.81 ( -0.86 )
Optic Neuritis	2	4.73 ( 1.18 - 18.95 )	4.73 ( 5.88 )	4.73 ( 1.48 )	2.24 ( 0.57 )
Knee Operation	2	6.22 ( 1.55 - 24.92 )	6.22 ( 8.75 )	6.21 ( 1.95 )	2.63 ( 0.97 )
Heart Rate Irregular	2	2.23 ( 0.56 - 8.92 )	2.23 ( 1.35 )	2.23 ( 0.7 )	1.15 ( -0.51 )
Cholecystectomy	2	6.76 ( 1.69 - 27.09 )	6.76 ( 9.8 )	6.75 ( 2.11 )	2.75 ( 1.09 )
Alanine Aminotransferase Decreased	2	40.77 ( 10.11 - 164.36 )	40.74 ( 76.67 )	40.3 ( 12.55 )	5.33 ( 3.65 )
Febrile Neutropenia	2	0.3 ( 0.07 - 1.19 )	0.3 ( 3.34 )	0.3 ( 0.09 )	-1.75 ( -3.42 )
Pneumonia	2	0.11 ( 0.03 - 0.44 )	0.11 ( 14.31 )	0.11 ( 0.03 )	-3.17 ( -4.84 )
Incision Site Cellulitis	2	1036.71 ( 215.27 - 4992.52 )	1036.03 ( 1608.5 )	806.03 ( 216.34 )	9.65 ( 7.75 )
Neoplasm Progression	2	0.64 ( 0.16 - 2.57 )	0.64 ( 0.4 )	0.64 ( 0.2 )	-0.64 ( -2.3 )
Vitamin D Decreased	2	6.39 ( 1.59 - 25.58 )	6.38 ( 9.07 )	6.37 ( 2 )	2.67 ( 1 )
Skin Disorder	2	1.29 ( 0.32 - 5.15 )	1.29 ( 0.13 )	1.29 ( 0.4 )	0.36 ( -1.3 )
Rosacea	2	9.7 ( 2.42 - 38.88 )	9.7 ( 15.56 )	9.67 ( 3.03 )	3.27 ( 1.6 )
Wheezing	2	0.54 ( 0.13 - 2.15 )	0.54 ( 0.79 )	0.54 ( 0.17 )	-0.89 ( -2.56 )
Gastrointestinal Disorder	2	0.4 ( 0.1 - 1.59 )	0.4 ( 1.82 )	0.4 ( 0.12 )	-1.33 ( -2.99 )
Drug Hypersensitivity	2	0.18 ( 0.05 - 0.74 )	0.18 ( 7.23 )	0.18 ( 0.06 )	-2.44 ( -4.1 )
Aphasia	2	1.55 ( 0.39 - 6.2 )	1.55 ( 0.39 )	1.55 ( 0.49 )	0.63 ( -1.04 )
Dysphonia	2	0.94 ( 0.24 - 3.77 )	0.94 ( 0.01 )	0.94 ( 0.3 )	-0.09 ( -1.75 )
Trichorrhexis	2	36.1 ( 8.96 - 145.42 )	36.08 ( 67.55 )	35.74 ( 11.14 )	5.16 ( 3.48 )
Maternal Exposure During Pregnancy	2	0.25 ( 0.06 - 1.02 )	0.25 ( 4.38 )	0.25 ( 0.08 )	-1.97 ( -3.64 )
Menstruation Irregular	2	4.88 ( 1.22 - 19.55 )	4.88 ( 6.16 )	4.88 ( 1.53 )	2.29 ( 0.62 )
Periorbital Oedema	2	6.12 ( 1.53 - 24.52 )	6.12 ( 8.55 )	6.11 ( 1.91 )	2.61 ( 0.94 )
Rash Macular	2	1.32 ( 0.33 - 5.27 )	1.32 ( 0.15 )	1.32 ( 0.41 )	0.4 ( -1.27 )
Frequent Bowel Movements	2	1.3 ( 0.32 - 5.2 )	1.3 ( 0.14 )	1.3 ( 0.41 )	0.38 ( -1.29 )
Neuropathy Peripheral	2	0.33 ( 0.08 - 1.31 )	0.33 ( 2.74 )	0.33 ( 0.1 )	-1.6 ( -3.27 )
Product Prescribing Error	2	0.91 ( 0.23 - 3.63 )	0.91 ( 0.02 )	0.91 ( 0.28 )	-0.14 ( -1.81 )
Protein Total Decreased	2	13.46 ( 3.36 - 54 )	13.45 ( 22.97 )	13.41 ( 4.19 )	3.75 ( 2.07 )
Hyponatraemia	2	0.47 ( 0.12 - 1.86 )	0.47 ( 1.22 )	0.47 ( 0.15 )	-1.1 ( -2.77 )
Gait Inability	2	1.22 ( 0.3 - 4.87 )	1.22 ( 0.08 )	1.22 ( 0.38 )	0.28 ( -1.39 )
Hyperhidrosis	2	0.38 ( 0.1 - 1.52 )	0.38 ( 2.01 )	0.38 ( 0.12 )	-1.39 ( -3.06 )
Metastases To Lung	2	2.52 ( 0.63 - 10.09 )	2.52 ( 1.83 )	2.52 ( 0.79 )	1.33 ( -0.34 )
Lymphopenia	2	1.38 ( 0.34 - 5.51 )	1.38 ( 0.21 )	1.38 ( 0.43 )	0.46 ( -1.21 )
Road Traffic Accident	2	1.49 ( 0.37 - 5.95 )	1.49 ( 0.32 )	1.49 ( 0.47 )	0.57 ( -1.09 )
Muscle Strain	2	6.41 ( 1.6 - 25.67 )	6.41 ( 9.11 )	6.4 ( 2 )	2.68 ( 1.01 )
White Blood Cell Count Increased	2	1.24 ( 0.31 - 4.94 )	1.24 ( 0.09 )	1.24 ( 0.39 )	0.31 ( -1.36 )
Unevaluable Event	2	0.9 ( 0.23 - 3.62 )	0.9 ( 0.02 )	0.9 ( 0.28 )	-0.14 ( -1.81 )
Inappropriate Schedule Of Product Administration	2	0.16 ( 0.04 - 0.63 )	0.16 ( 9.1 )	0.16 ( 0.05 )	-2.67 ( -4.34 )
Weight Fluctuation	2	3.38 ( 0.84 - 13.53 )	3.38 ( 3.35 )	3.38 ( 1.06 )	1.76 ( 0.09 )
Libido Decreased	1	3.92 ( 0.55 - 27.88 )	3.92 ( 2.17 )	3.92 ( 0.76 )	1.97 ( -0.07 )
Nervous System Disorder	1	1.04 ( 0.15 - 7.4 )	1.04 ( 0 )	1.04 ( 0.2 )	0.06 ( -1.98 )
Thyroid Disorder	1	1.8 ( 0.25 - 12.8 )	1.8 ( 0.36 )	1.8 ( 0.35 )	0.85 ( -1.19 )
Facial Paralysis	1	1.53 ( 0.22 - 10.9 )	1.53 ( 0.19 )	1.53 ( 0.3 )	0.62 ( -1.42 )
Immune System Disorder	1	1.92 ( 0.27 - 13.65 )	1.92 ( 0.44 )	1.92 ( 0.37 )	0.94 ( -1.1 )
Parasitic Gastroenteritis	1	69.76 ( 9.64 - 504.75 )	69.73 ( 66.47 )	68.44 ( 13.07 )	6.1 ( 4.02 )
Thyroxine Increased	1	31.54 ( 4.4 - 225.91 )	31.53 ( 29.31 )	31.27 ( 6.02 )	4.97 ( 2.91 )
Gastroenteritis Viral	1	1.41 ( 0.2 - 9.99 )	1.41 ( 0.12 )	1.41 ( 0.27 )	0.49 ( -1.55 )
Hypoglycaemia	1	0.39 ( 0.06 - 2.78 )	0.39 ( 0.94 )	0.39 ( 0.08 )	-1.35 ( -3.39 )
Incoherent	1	5.61 ( 0.79 - 39.93 )	5.61 ( 3.79 )	5.61 ( 1.09 )	2.49 ( 0.44 )
Rash Vesicular	1	3.55 ( 0.5 - 25.25 )	3.55 ( 1.83 )	3.55 ( 0.69 )	1.83 ( -0.22 )
Condition Aggravated	1	0.04 ( 0.01 - 0.3 )	0.04 ( 21.4 )	0.04 ( 0.01 )	-4.54 ( -6.58 )
Head Discomfort	1	1.59 ( 0.22 - 11.29 )	1.59 ( 0.22 )	1.59 ( 0.31 )	0.67 ( -1.37 )
Abnormal Sensation In Eye	1	13.59 ( 1.91 - 96.83 )	13.58 ( 11.61 )	13.53 ( 2.62 )	3.76 ( 1.71 )
Blood Alkaline Phosphatase	1	84.36 ( 11.61 - 612.78 )	84.33 ( 80.47 )	82.43 ( 15.69 )	6.37 ( 4.28 )
Vomiting Projectile	1	12.86 ( 1.8 - 91.66 )	12.86 ( 10.9 )	12.82 ( 2.48 )	3.68 ( 1.63 )
Breast Pain	1	3.56 ( 0.5 - 25.3 )	3.56 ( 1.84 )	3.56 ( 0.69 )	1.83 ( -0.21 )
Nasal Congestion	1	0.35 ( 0.05 - 2.5 )	0.35 ( 1.19 )	0.35 ( 0.07 )	-1.5 ( -3.54 )
Quality Of Life Decreased	1	2.17 ( 0.31 - 15.44 )	2.17 ( 0.63 )	2.17 ( 0.42 )	1.12 ( -0.92 )
Generalised Oedema	1	1.5 ( 0.21 - 10.64 )	1.5 ( 0.17 )	1.5 ( 0.29 )	0.58 ( -1.46 )
Irritability	1	0.65 ( 0.09 - 4.64 )	0.65 ( 0.18 )	0.65 ( 0.13 )	-0.61 ( -2.65 )
Knee Deformity	1	11.89 ( 1.67 - 84.73 )	11.89 ( 9.94 )	11.85 ( 2.29 )	3.57 ( 1.52 )
Limb Discomfort	1	0.81 ( 0.11 - 5.75 )	0.81 ( 0.04 )	0.81 ( 0.16 )	-0.3 ( -2.35 )
Haemorrhage	1	0.22 ( 0.03 - 1.54 )	0.22 ( 2.83 )	0.22 ( 0.04 )	-2.21 ( -4.25 )
Dermatitis Contact	1	2.09 ( 0.29 - 14.83 )	2.09 ( 0.57 )	2.09 ( 0.4 )	1.06 ( -0.98 )
Hypokinesia	1	1.57 ( 0.22 - 11.17 )	1.57 ( 0.21 )	1.57 ( 0.3 )	0.65 ( -1.39 )
Chronic Obstructive Pulmonary Disease	1	0.54 ( 0.08 - 3.85 )	0.54 ( 0.39 )	0.54 ( 0.11 )	-0.88 ( -2.93 )
Cyst	1	2.36 ( 0.33 - 16.77 )	2.36 ( 0.78 )	2.36 ( 0.46 )	1.24 ( -0.8 )
Joint Instability	1	25.54 ( 3.57 - 182.66 )	25.54 ( 23.41 )	25.36 ( 4.89 )	4.66 ( 2.61 )
Rales	1	2.3 ( 0.32 - 16.34 )	2.3 ( 0.73 )	2.3 ( 0.45 )	1.2 ( -0.84 )
Tumour Invasion	1	29.02 ( 4.05 - 207.69 )	29.01 ( 26.83 )	28.79 ( 5.55 )	4.85 ( 2.79 )
Bacterial Test Positive	1	6.88 ( 0.97 - 48.97 )	6.88 ( 5.02 )	6.87 ( 1.33 )	2.78 ( 0.74 )
Discomfort	1	0.26 ( 0.04 - 1.87 )	0.26 ( 2.07 )	0.26 ( 0.05 )	-1.93 ( -3.97 )
Mobility Decreased	1	0.33 ( 0.05 - 2.36 )	0.33 ( 1.34 )	0.33 ( 0.06 )	-1.59 ( -3.63 )
Skin Hyperpigmentation	1	3.11 ( 0.44 - 22.09 )	3.11 ( 1.43 )	3.11 ( 0.6 )	1.63 ( -0.41 )
Tooth Abscess	1	2.16 ( 0.3 - 15.36 )	2.16 ( 0.62 )	2.16 ( 0.42 )	1.11 ( -0.93 )
Toothache	1	1.52 ( 0.21 - 10.78 )	1.52 ( 0.18 )	1.52 ( 0.29 )	0.6 ( -1.44 )
Limb Mass	1	8.89 ( 1.25 - 63.29 )	8.89 ( 6.98 )	8.87 ( 1.72 )	3.15 ( 1.1 )
Skin Warm	1	4.17 ( 0.59 - 29.67 )	4.17 ( 2.41 )	4.17 ( 0.81 )	2.06 ( 0.02 )
Lip Dry	1	2.03 ( 0.29 - 14.4 )	2.03 ( 0.52 )	2.03 ( 0.39 )	1.02 ( -1.02 )
Adrenal Insufficiency	1	0.82 ( 0.11 - 5.8 )	0.82 ( 0.04 )	0.82 ( 0.16 )	-0.29 ( -2.33 )
Bedridden	1	2.66 ( 0.37 - 18.94 )	2.66 ( 1.04 )	2.66 ( 0.52 )	1.41 ( -0.63 )
Electrolyte Imbalance	1	1.2 ( 0.17 - 8.5 )	1.2 ( 0.03 )	1.2 ( 0.23 )	0.26 ( -1.78 )
Hypopituitarism	1	4.98 ( 0.7 - 35.43 )	4.98 ( 3.18 )	4.98 ( 0.96 )	2.31 ( 0.27 )
Hypothyroidism	1	0.44 ( 0.06 - 3.1 )	0.44 ( 0.73 )	0.44 ( 0.08 )	-1.19 ( -3.24 )
Lagophthalmos	1	61.48 ( 8.52 - 443.88 )	61.46 ( 58.48 )	60.45 ( 11.56 )	5.92 ( 3.84 )
Abnormal Dreams	1	2.29 ( 0.32 - 16.25 )	2.29 ( 0.72 )	2.29 ( 0.44 )	1.19 ( -0.85 )
Attention Deficit Hyperactivity Disorder	1	4.6 ( 0.65 - 32.73 )	4.6 ( 2.82 )	4.6 ( 0.89 )	2.2 ( 0.16 )
Gestational Hypertension	1	12.09 ( 1.7 - 86.14 )	12.09 ( 10.14 )	12.05 ( 2.33 )	3.59 ( 1.54 )
Hormone Level Abnormal	1	8.34 ( 1.17 - 59.35 )	8.34 ( 6.44 )	8.32 ( 1.61 )	3.06 ( 1.01 )
Intentional Product Misuse	1	0.25 ( 0.04 - 1.78 )	0.25 ( 2.25 )	0.25 ( 0.05 )	-2 ( -4.04 )
Pharyngeal Paraesthesia	1	6.1 ( 0.86 - 43.36 )	6.09 ( 4.25 )	6.09 ( 1.18 )	2.61 ( 0.56 )
Prothrombin Time Prolonged	1	5.01 ( 0.7 - 35.63 )	5.01 ( 3.2 )	5 ( 0.97 )	2.32 ( 0.28 )
Gastrointestinal Pain	1	2.54 ( 0.36 - 18.02 )	2.54 ( 0.93 )	2.53 ( 0.49 )	1.34 ( -0.7 )
Candida Infection	1	0.88 ( 0.12 - 6.24 )	0.88 ( 0.02 )	0.88 ( 0.17 )	-0.19 ( -2.23 )
Limb Injury	1	0.86 ( 0.12 - 6.12 )	0.86 ( 0.02 )	0.86 ( 0.17 )	-0.22 ( -2.26 )
Oral Herpes	1	0.8 ( 0.11 - 5.71 )	0.8 ( 0.05 )	0.8 ( 0.16 )	-0.31 ( -2.36 )
Malignant Neoplasm Progression	1	0.13 ( 0.02 - 0.89 )	0.13 ( 6.07 )	0.13 ( 0.02 )	-2.99 ( -5.03 )
Pleural Effusion	1	0.28 ( 0.04 - 2.01 )	0.28 ( 1.81 )	0.28 ( 0.06 )	-1.82 ( -3.86 )
Eye Inflammation	1	1.69 ( 0.24 - 12.02 )	1.69 ( 0.28 )	1.69 ( 0.33 )	0.76 ( -1.28 )
Bone Disorder	1	2.37 ( 0.33 - 16.86 )	2.37 ( 0.79 )	2.37 ( 0.46 )	1.25 ( -0.8 )
Blood Disorder	1	2.96 ( 0.42 - 21.06 )	2.96 ( 1.3 )	2.96 ( 0.57 )	1.57 ( -0.48 )
Sensitivity To Weather Change	1	2.39 ( 0.34 - 16.99 )	2.39 ( 0.81 )	2.39 ( 0.46 )	1.26 ( -0.79 )
Papilloedema	1	3.55 ( 0.5 - 25.2 )	3.54 ( 1.83 )	3.54 ( 0.69 )	1.82 ( -0.22 )
Tanning	1	145.09 ( 19.65 - 1071.15 )	145.04 ( 137.55 )	139.5 ( 26.19 )	7.12 ( 5.01 )
Testicular Atrophy	1	54.14 ( 7.51 - 390.11 )	54.12 ( 51.37 )	53.34 ( 10.22 )	5.74 ( 3.67 )
Affective Disorder	1	2.41 ( 0.34 - 17.15 )	2.41 ( 0.83 )	2.41 ( 0.47 )	1.27 ( -0.77 )
Ear Swelling	1	9.32 ( 1.31 - 66.38 )	9.32 ( 7.41 )	9.3 ( 1.8 )	3.22 ( 1.17 )
Movement Disorder	1	0.97 ( 0.14 - 6.88 )	0.97 ( 0 )	0.97 ( 0.19 )	-0.05 ( -2.09 )
Renal Disorder	1	0.6 ( 0.08 - 4.25 )	0.6 ( 0.27 )	0.6 ( 0.12 )	-0.74 ( -2.78 )
Renal Function Test Abnormal	1	4.69 ( 0.66 - 33.36 )	4.69 ( 2.9 )	4.69 ( 0.91 )	2.23 ( 0.18 )
Alanine Aminotransferase Abnormal	1	5.13 ( 0.72 - 36.48 )	5.13 ( 3.32 )	5.12 ( 0.99 )	2.36 ( 0.31 )
Aspartate Aminotransferase Abnormal	1	9.7 ( 1.36 - 69.05 )	9.7 ( 7.78 )	9.67 ( 1.87 )	3.27 ( 1.23 )
Gamma-Glutamyltransferase	1	164.88 ( 22.22 - 1223.61 )	164.82 ( 155.75 )	157.7 ( 29.48 )	7.3 ( 5.18 )
Hepatic Function Abnormal	1	0.33 ( 0.05 - 2.37 )	0.33 ( 1.33 )	0.33 ( 0.06 )	-1.58 ( -3.62 )
Monocyte Count Increased	1	3.11 ( 0.44 - 22.07 )	3.1 ( 1.43 )	3.1 ( 0.6 )	1.63 ( -0.41 )
Red Cell Distribution Width Increased	1	2.5 ( 0.35 - 17.8 )	2.5 ( 0.9 )	2.5 ( 0.49 )	1.32 ( -0.72 )
Tension	1	4.81 ( 0.68 - 34.21 )	4.81 ( 3.01 )	4.8 ( 0.93 )	2.26 ( 0.22 )
Neutrophil Count Decreased	1	0.27 ( 0.04 - 1.91 )	0.27 ( 1.99 )	0.27 ( 0.05 )	-1.89 ( -3.94 )
Blood Testosterone Decreased	1	12.68 ( 1.78 - 90.37 )	12.68 ( 10.72 )	12.64 ( 2.44 )	3.66 ( 1.61 )
Sinus Headache	1	7.23 ( 1.02 - 51.41 )	7.22 ( 5.35 )	7.21 ( 1.4 )	2.85 ( 0.81 )
Tension Headache	1	4.95 ( 0.7 - 35.24 )	4.95 ( 3.15 )	4.95 ( 0.96 )	2.31 ( 0.26 )
Adverse Reaction	1	1.86 ( 0.26 - 13.21 )	1.86 ( 0.4 )	1.86 ( 0.36 )	0.89 ( -1.15 )
Device Related Infection	1	1.28 ( 0.18 - 9.09 )	1.28 ( 0.06 )	1.28 ( 0.25 )	0.36 ( -1.69 )
Haemorrhage Urinary Tract	1	10.22 ( 1.43 - 72.76 )	10.21 ( 8.29 )	10.19 ( 1.97 )	3.35 ( 1.3 )
Macular Degeneration	1	2.58 ( 0.36 - 18.32 )	2.58 ( 0.96 )	2.58 ( 0.5 )	1.37 ( -0.68 )
Mass	1	1.83 ( 0.26 - 12.97 )	1.83 ( 0.37 )	1.83 ( 0.35 )	0.87 ( -1.17 )
Prostatic Disorder	1	6.43 ( 0.9 - 45.75 )	6.43 ( 4.58 )	6.42 ( 1.24 )	2.68 ( 0.64 )
Psoriasis	1	0.16 ( 0.02 - 1.13 )	0.16 ( 4.45 )	0.16 ( 0.03 )	-2.65 ( -4.69 )
Wound Complication	1	7.08 ( 1 - 50.41 )	7.08 ( 5.21 )	7.07 ( 1.37 )	2.82 ( 0.78 )
Wound Drainage	1	44.23 ( 6.16 - 317.9 )	44.22 ( 41.73 )	43.7 ( 8.39 )	5.45 ( 3.38 )
Oropharyngeal Pain	1	0.24 ( 0.03 - 1.73 )	0.24 ( 2.34 )	0.24 ( 0.05 )	-2.03 ( -4.07 )
Procedural Pain	1	0.81 ( 0.11 - 5.73 )	0.81 ( 0.05 )	0.81 ( 0.16 )	-0.31 ( -2.35 )
Lumbar Puncture	1	61.48 ( 8.52 - 443.88 )	61.46 ( 58.48 )	60.45 ( 11.56 )	5.92 ( 3.84 )
Stent Placement	1	5.4 ( 0.76 - 38.39 )	5.4 ( 3.58 )	5.39 ( 1.04 )	2.43 ( 0.39 )
Urine Odour Abnormal	1	5.52 ( 0.78 - 39.26 )	5.52 ( 3.69 )	5.51 ( 1.07 )	2.46 ( 0.42 )
Hospice Care	1	1.43 ( 0.2 - 10.18 )	1.43 ( 0.13 )	1.43 ( 0.28 )	0.52 ( -1.52 )
Blood Sodium Abnormal	1	21.21 ( 2.97 - 151.5 )	21.21 ( 19.14 )	21.09 ( 4.07 )	4.4 ( 2.35 )
Hypotension	1	0.08 ( 0.01 - 0.58 )	0.08 ( 10.29 )	0.08 ( 0.02 )	-3.6 ( -5.65 )
Skin Turgor Decreased	1	45.91 ( 6.39 - 330.12 )	45.9 ( 43.37 )	45.34 ( 8.7 )	5.5 ( 3.44 )
Stomatitis	1	0.26 ( 0.04 - 1.81 )	0.26 ( 2.17 )	0.26 ( 0.05 )	-1.97 ( -4.01 )
Hepatic Mass	1	9.52 ( 1.34 - 67.78 )	9.52 ( 7.6 )	9.5 ( 1.84 )	3.25 ( 1.2 )
Pneumonia Mycoplasmal	1	18.6 ( 2.61 - 132.76 )	18.6 ( 16.56 )	18.51 ( 3.57 )	4.21 ( 2.16 )
Autoimmune Thyroiditis	1	4.9 ( 0.69 - 34.85 )	4.9 ( 3.1 )	4.89 ( 0.95 )	2.29 ( 0.25 )
Blood Chloride Increased	1	11.26 ( 1.58 - 80.24 )	11.26 ( 9.32 )	11.23 ( 2.17 )	3.49 ( 1.44 )
Diplopia	1	0.94 ( 0.13 - 6.7 )	0.94 ( 0 )	0.94 ( 0.18 )	-0.08 ( -2.13 )
Hyperproteinaemia	1	62.54 ( 8.66 - 451.66 )	62.52 ( 59.51 )	61.48 ( 11.76 )	5.94 ( 3.87 )
Hypertensive Crisis	1	1.37 ( 0.19 - 9.74 )	1.37 ( 0.1 )	1.37 ( 0.27 )	0.46 ( -1.59 )
Thyroid Hormones Increased	1	25.54 ( 3.57 - 182.66 )	25.54 ( 23.41 )	25.36 ( 4.89 )	4.66 ( 2.61 )
Ocular Hyperaemia	1	0.5 ( 0.07 - 3.54 )	0.5 ( 0.51 )	0.5 ( 0.1 )	-1.01 ( -3.05 )
Tachycardia	1	0.17 ( 0.02 - 1.23 )	0.17 ( 3.94 )	0.17 ( 0.03 )	-2.53 ( -4.57 )
Accident	1	2.47 ( 0.35 - 17.54 )	2.47 ( 0.87 )	2.47 ( 0.48 )	1.3 ( -0.74 )
Injection Site Pruritus	1	0.55 ( 0.08 - 3.9 )	0.55 ( 0.37 )	0.55 ( 0.11 )	-0.86 ( -2.91 )
Loss Of Consciousness	1	0.2 ( 0.03 - 1.45 )	0.2 ( 3.1 )	0.2 ( 0.04 )	-2.29 ( -4.33 )
Hepatic Lesion	1	3.54 ( 0.5 - 25.15 )	3.54 ( 1.82 )	3.54 ( 0.69 )	1.82 ( -0.22 )
Incision Site Haemorrhage	1	35.56 ( 4.96 - 254.97 )	35.55 ( 33.25 )	35.21 ( 6.77 )	5.14 ( 3.08 )
Micturition Disorder	1	8.36 ( 1.17 - 59.49 )	8.36 ( 6.46 )	8.34 ( 1.61 )	3.06 ( 1.01 )
Morning Sickness	1	25.02 ( 3.5 - 178.85 )	25.01 ( 22.89 )	24.84 ( 4.79 )	4.63 ( 2.58 )
Hepatic Enzyme Decreased	1	54.96 ( 7.63 - 396.11 )	54.94 ( 52.17 )	54.14 ( 10.37 )	5.76 ( 3.69 )
Oropharyngeal Blistering	1	33.28 ( 4.64 - 238.45 )	33.27 ( 31.01 )	32.97 ( 6.35 )	5.04 ( 2.98 )
Pancreatitis	1	0.45 ( 0.06 - 3.18 )	0.45 ( 0.68 )	0.45 ( 0.09 )	-1.16 ( -3.2 )
Pharyngeal Contusion	1	3627.29 ( 226.82 - 58007.4 )	3626.12 ( 1812.06 )	1813.56 ( 178.31 )	10.82 ( 8.19 )
Temperature Intolerance	1	2.33 ( 0.33 - 16.55 )	2.33 ( 0.76 )	2.33 ( 0.45 )	1.22 ( -0.82 )
Exposure To Sars-Cov-2	1	4.58 ( 0.64 - 32.56 )	4.58 ( 2.79 )	4.57 ( 0.89 )	2.19 ( 0.15 )
Blood Blister	1	10.89 ( 1.53 - 77.58 )	10.89 ( 8.95 )	10.86 ( 2.1 )	3.44 ( 1.39 )
Bone Deformity	1	30.48 ( 4.26 - 218.25 )	30.47 ( 28.27 )	30.23 ( 5.82 )	4.92 ( 2.86 )
Skin Weeping	1	3.13 ( 0.44 - 22.24 )	3.13 ( 1.45 )	3.13 ( 0.61 )	1.64 ( -0.4 )
Suicidal Ideation	1	0.33 ( 0.05 - 2.35 )	0.33 ( 1.35 )	0.33 ( 0.06 )	-1.59 ( -3.63 )
Scar	1	2.44 ( 0.34 - 17.37 )	2.44 ( 0.85 )	2.44 ( 0.47 )	1.29 ( -0.75 )
Wrong Dose	1	5.33 ( 0.75 - 37.93 )	5.33 ( 3.52 )	5.33 ( 1.03 )	2.41 ( 0.37 )
Yawning	1	11.41 ( 1.6 - 81.25 )	11.4 ( 9.46 )	11.37 ( 2.2 )	3.51 ( 1.46 )
Intentional Product Use Issue	1	0.1 ( 0.01 - 0.69 )	0.1 ( 8.37 )	0.1 ( 0.02 )	-3.36 ( -5.4 )
Blood Chloride Decreased	1	11.37 ( 1.6 - 81 )	11.37 ( 9.43 )	11.33 ( 2.19 )	3.5 ( 1.46 )
Blood Creatinine Decreased	1	4.93 ( 0.69 - 35.04 )	4.93 ( 3.13 )	4.92 ( 0.95 )	2.3 ( 0.26 )
Blood Electrolytes Decreased	1	16.49 ( 2.31 - 117.61 )	16.48 ( 14.48 )	16.41 ( 3.17 )	4.04 ( 1.99 )
Blood Lactate Dehydrogenase Abnormal	1	25.91 ( 3.62 - 185.28 )	25.9 ( 23.77 )	25.72 ( 4.96 )	4.69 ( 2.63 )
Blood Sodium Decreased	1	1.49 ( 0.21 - 10.61 )	1.49 ( 0.16 )	1.49 ( 0.29 )	0.58 ( -1.46 )
Blood Urea Decreased	1	18.41 ( 2.58 - 131.41 )	18.41 ( 16.38 )	18.32 ( 3.54 )	4.2 ( 2.14 )
Tumour Compression	1	59.46 ( 8.24 - 429.1 )	59.44 ( 56.53 )	58.5 ( 11.19 )	5.87 ( 3.8 )
Urine Flow Decreased	1	21.09 ( 2.95 - 150.62 )	21.08 ( 19.02 )	20.97 ( 4.05 )	4.39 ( 2.34 )
Vein Collapse	1	18.89 ( 2.65 - 134.85 )	18.89 ( 16.85 )	18.79 ( 3.63 )	4.23 ( 2.18 )
Muscle Fatigue	1	8.01 ( 1.13 - 56.99 )	8 ( 6.12 )	7.99 ( 1.55 )	3 ( 0.95 )
Muscle Strength Abnormal	1	22.39 ( 3.13 - 159.97 )	22.38 ( 20.3 )	22.25 ( 4.29 )	4.48 ( 2.42 )
Feeling Hot	1	0.35 ( 0.05 - 2.46 )	0.35 ( 1.24 )	0.35 ( 0.07 )	-1.53 ( -3.57 )
Rhabdomyolysis	1	0.35 ( 0.05 - 2.49 )	0.35 ( 1.2 )	0.35 ( 0.07 )	-1.51 ( -3.55 )
Cerebral Disorder	1	3.41 ( 0.48 - 24.21 )	3.4 ( 1.7 )	3.4 ( 0.66 )	1.77 ( -0.28 )
Oral Pain	1	1.18 ( 0.17 - 8.39 )	1.18 ( 0.03 )	1.18 ( 0.23 )	0.24 ( -1.8 )
Medication Error	1	0.5 ( 0.07 - 3.55 )	0.5 ( 0.5 )	0.5 ( 0.1 )	-1 ( -3.04 )
Myelosuppression	1	0.21 ( 0.03 - 1.5 )	0.21 ( 2.95 )	0.21 ( 0.04 )	-2.24 ( -4.28 )
Blood Pressure Decreased	1	0.33 ( 0.05 - 2.33 )	0.33 ( 1.38 )	0.33 ( 0.06 )	-1.61 ( -3.65 )
White Blood Cell Count Abnormal	1	3.13 ( 0.44 - 22.26 )	3.13 ( 1.45 )	3.13 ( 0.61 )	1.65 ( -0.4 )
Stress Fracture	1	5.59 ( 0.79 - 39.75 )	5.59 ( 3.76 )	5.58 ( 1.08 )	2.48 ( 0.44 )
Aspartate Aminotransferase Decreased	1	26.48 ( 3.7 - 189.37 )	26.47 ( 24.33 )	26.28 ( 5.07 )	4.72 ( 2.66 )
Blood Bilirubin Decreased	1	20.04 ( 2.81 - 143.09 )	20.03 ( 17.98 )	19.93 ( 3.85 )	4.32 ( 2.26 )
Suspected Covid-19	1	2.69 ( 0.38 - 19.11 )	2.69 ( 1.06 )	2.69 ( 0.52 )	1.43 ( -0.62 )
Bunion Operation	1	40.3 ( 5.61 - 289.34 )	40.29 ( 37.89 )	39.86 ( 7.66 )	5.32 ( 3.25 )
Hip Arthroplasty	1	1.29 ( 0.18 - 9.14 )	1.29 ( 0.06 )	1.29 ( 0.25 )	0.36 ( -1.68 )
Sars-Cov-2 Test Positive	1	0.73 ( 0.1 - 5.16 )	0.73 ( 0.1 )	0.73 ( 0.14 )	-0.46 ( -2.5 )
Haemoptysis	1	0.69 ( 0.1 - 4.9 )	0.69 ( 0.14 )	0.69 ( 0.13 )	-0.54 ( -2.58 )
Product Odour Abnormal	1	4.32 ( 0.61 - 30.7 )	4.32 ( 2.55 )	4.31 ( 0.84 )	2.11 ( 0.07 )
Product Taste Abnormal	1	4.11 ( 0.58 - 29.24 )	4.11 ( 2.35 )	4.11 ( 0.8 )	2.04 ( 0 )
Drug Dependence	1	0.55 ( 0.08 - 3.88 )	0.55 ( 0.38 )	0.55 ( 0.11 )	-0.87 ( -2.91 )
Dyslexia	1	29.25 ( 4.09 - 209.38 )	29.24 ( 27.06 )	29.02 ( 5.59 )	4.86 ( 2.8 )
Adrenal Neoplasm	1	59.46 ( 8.24 - 429.1 )	59.44 ( 56.53 )	58.5 ( 11.19 )	5.87 ( 3.8 )
Decreased Interest	1	7.68 ( 1.08 - 54.69 )	7.68 ( 5.8 )	7.67 ( 1.48 )	2.94 ( 0.89 )
Palpitations	1	0.23 ( 0.03 - 1.64 )	0.23 ( 2.56 )	0.23 ( 0.04 )	-2.11 ( -4.15 )
Physical Disability	1	8.91 ( 1.25 - 63.44 )	8.91 ( 7 )	8.89 ( 1.72 )	3.15 ( 1.11 )
Blood Calcium Decreased	1	1.7 ( 0.24 - 12.06 )	1.7 ( 0.29 )	1.7 ( 0.33 )	0.76 ( -1.28 )
Hand Dermatitis	1	16.19 ( 2.27 - 115.5 )	16.19 ( 14.19 )	16.12 ( 3.11 )	4.01 ( 1.96 )
Tooth Extraction	1	2.58 ( 0.36 - 18.32 )	2.58 ( 0.96 )	2.58 ( 0.5 )	1.37 ( -0.68 )
Blood Albumin Increased	1	23.55 ( 3.3 - 168.33 )	23.55 ( 21.45 )	23.4 ( 4.51 )	4.55 ( 2.49 )
Epistaxis	1	0.31 ( 0.04 - 2.18 )	0.31 ( 1.57 )	0.31 ( 0.06 )	-1.7 ( -3.74 )
Prothrombin Time Abnormal	1	43.18 ( 6.01 - 310.25 )	43.17 ( 40.71 )	42.67 ( 8.2 )	5.42 ( 3.35 )
Vitamin K Decreased	1	190.91 ( 25.55 - 1426.57 )	190.85 ( 179.41 )	181.36 ( 33.7 )	7.5 ( 5.37 )
Arthropod Bite	1	3.47 ( 0.49 - 24.69 )	3.47 ( 1.76 )	3.47 ( 0.67 )	1.8 ( -0.25 )
Brain Oedema	1	1.31 ( 0.18 - 9.3 )	1.31 ( 0.07 )	1.31 ( 0.25 )	0.39 ( -1.65 )
Noninfective Encephalitis	1	27.27 ( 3.81 - 195.11 )	27.26 ( 25.11 )	27.07 ( 5.22 )	4.76 ( 2.7 )
Intervertebral Disc Protrusion	1	1.6 ( 0.23 - 11.4 )	1.6 ( 0.23 )	1.6 ( 0.31 )	0.68 ( -1.36 )
Herpes Zoster	1	0.32 ( 0.04 - 2.24 )	0.32 ( 1.48 )	0.32 ( 0.06 )	-1.66 ( -3.7 )
Viral Pharyngitis	1	48.36 ( 6.72 - 347.96 )	48.35 ( 45.76 )	47.73 ( 9.15 )	5.58 ( 3.51 )
Oral Mucosal Eruption	1	14.34 ( 2.01 - 102.21 )	14.33 ( 12.35 )	14.28 ( 2.76 )	3.84 ( 1.79 )
Behcet'S Syndrome	1	7.57 ( 1.06 - 53.89 )	7.57 ( 5.69 )	7.56 ( 1.46 )	2.92 ( 0.87 )
Vulvovaginal Rash	1	80.61 ( 11.11 - 584.96 )	80.58 ( 76.88 )	78.85 ( 15.02 )	6.3 ( 4.22 )
Nail Disorder	1	2.31 ( 0.33 - 16.43 )	2.31 ( 0.74 )	2.31 ( 0.45 )	1.21 ( -0.83 )
Nail Cuticle Fissure	1	181.36 ( 24.33 - 1351.84 )	181.31 ( 170.77 )	172.72 ( 32.17 )	7.43 ( 5.3 )
Vulvovaginal Pain	1	9.99 ( 1.4 - 71.15 )	9.99 ( 8.07 )	9.96 ( 1.93 )	3.32 ( 1.27 )
Anal Pruritus	1	29.73 ( 4.15 - 212.84 )	29.72 ( 27.53 )	29.49 ( 5.68 )	4.88 ( 2.82 )
Proctalgia	1	3.36 ( 0.47 - 23.87 )	3.36 ( 1.65 )	3.36 ( 0.65 )	1.75 ( -0.3 )
Vulval Ulceration	1	44.78 ( 6.23 - 321.88 )	44.77 ( 42.27 )	44.23 ( 8.49 )	5.47 ( 3.4 )
Poor Quality Sleep	1	1.34 ( 0.19 - 9.51 )	1.34 ( 0.09 )	1.34 ( 0.26 )	0.42 ( -1.62 )
Vulvovaginal Inflammation	1	28.12 ( 3.93 - 201.2 )	28.11 ( 25.94 )	27.9 ( 5.38 )	4.8 ( 2.75 )
Mouth Ulceration	1	0.77 ( 0.11 - 5.44 )	0.77 ( 0.07 )	0.77 ( 0.15 )	-0.38 ( -2.43 )
Ocular Discomfort	1	2.09 ( 0.29 - 14.86 )	2.09 ( 0.57 )	2.09 ( 0.41 )	1.06 ( -0.98 )
Scratch	1	1.92 ( 0.27 - 13.68 )	1.92 ( 0.44 )	1.92 ( 0.37 )	0.94 ( -1.1 )
Muscle Injury	1	1.12 ( 0.16 - 7.94 )	1.12 ( 0.01 )	1.12 ( 0.22 )	0.16 ( -1.88 )
Red Blood Cell Count Abnormal	1	17.61 ( 2.47 - 125.64 )	17.6 ( 15.58 )	17.52 ( 3.38 )	4.13 ( 2.08 )
Vitamin B12 Decreased	1	7.31 ( 1.03 - 52.03 )	7.31 ( 5.44 )	7.3 ( 1.41 )	2.87 ( 0.82 )
Osteosarcoma	1	30.23 ( 4.22 - 216.42 )	30.22 ( 28.02 )	29.98 ( 5.77 )	4.91 ( 2.85 )
Asthenopia	1	7.03 ( 0.99 - 50.01 )	7.03 ( 5.16 )	7.02 ( 1.36 )	2.81 ( 0.77 )
Ulcerative Keratitis	1	5.64 ( 0.79 - 40.12 )	5.64 ( 3.81 )	5.63 ( 1.09 )	2.49 ( 0.45 )
Trigger Finger	1	7.45 ( 1.05 - 53 )	7.45 ( 5.57 )	7.43 ( 1.44 )	2.89 ( 0.85 )
Bursitis	1	1.35 ( 0.19 - 9.6 )	1.35 ( 0.09 )	1.35 ( 0.26 )	0.43 ( -1.61 )
Metabolic Surgery	1	14.22 ( 2 - 101.4 )	14.22 ( 12.24 )	14.17 ( 2.74 )	3.82 ( 1.78 )
Blood Urine Present	1	1.82 ( 0.26 - 12.95 )	1.82 ( 0.37 )	1.82 ( 0.35 )	0.87 ( -1.18 )
Bowel Movement Irregularity	1	2.84 ( 0.4 - 20.2 )	2.84 ( 1.19 )	2.84 ( 0.55 )	1.51 ( -0.54 )
Skin Fissures	1	0.85 ( 0.12 - 6.01 )	0.85 ( 0.03 )	0.85 ( 0.16 )	-0.24 ( -2.28 )
Skin Haemorrhage	1	1.2 ( 0.17 - 8.5 )	1.2 ( 0.03 )	1.2 ( 0.23 )	0.26 ( -1.78 )
Urge Incontinence	1	23.71 ( 3.32 - 169.44 )	23.7 ( 21.6 )	23.55 ( 4.54 )	4.56 ( 2.5 )
Hypoacusis	1	0.81 ( 0.11 - 5.77 )	0.81 ( 0.04 )	0.81 ( 0.16 )	-0.3 ( -2.34 )
Balance Disorder	1	0.37 ( 0.05 - 2.61 )	0.37 ( 1.09 )	0.37 ( 0.07 )	-1.44 ( -3.48 )
Overdose	1	0.14 ( 0.02 - 1.03 )	0.15 ( 5.04 )	0.15 ( 0.03 )	-2.78 ( -4.82 )
Renal Pain	1	3.19 ( 0.45 - 22.67 )	3.19 ( 1.5 )	3.19 ( 0.62 )	1.67 ( -0.37 )
Incontinence	1	2.54 ( 0.36 - 18.07 )	2.54 ( 0.94 )	2.54 ( 0.49 )	1.35 ( -0.7 )
Major Depression	1	2.73 ( 0.38 - 19.41 )	2.73 ( 1.1 )	2.73 ( 0.53 )	1.45 ( -0.59 )
Cholecystitis	1	1.65 ( 0.23 - 11.72 )	1.65 ( 0.26 )	1.65 ( 0.32 )	0.72 ( -1.32 )
Seborrhoea	1	22.96 ( 3.21 - 164.05 )	22.95 ( 20.86 )	22.81 ( 4.4 )	4.51 ( 2.46 )
Cervicogenic Headache	1	226.71 ( 30.05 - 1710.06 )	226.63 ( 211.42 )	213.36 ( 39.34 )	7.74 ( 5.59 )
Bronchitis Viral	1	26.48 ( 3.7 - 189.37 )	26.47 ( 24.33 )	26.28 ( 5.07 )	4.72 ( 2.66 )
Disability	1	1.75 ( 0.25 - 12.42 )	1.75 ( 0.32 )	1.75 ( 0.34 )	0.81 ( -1.24 )
Hypocalcaemia	1	0.65 ( 0.09 - 4.59 )	0.65 ( 0.19 )	0.65 ( 0.13 )	-0.63 ( -2.67 )
Posterior Reversible Encephalopathy Syndrome	1	1.09 ( 0.15 - 7.77 )	1.09 ( 0.01 )	1.09 ( 0.21 )	0.13 ( -1.91 )
Hypomagnesaemia	1	0.76 ( 0.11 - 5.38 )	0.76 ( 0.08 )	0.76 ( 0.15 )	-0.4 ( -2.44 )
Therapeutic Response Decreased	1	0.28 ( 0.04 - 1.96 )	0.28 ( 1.9 )	0.28 ( 0.05 )	-1.86 ( -3.9 )
Hypoalbuminaemia	1	1.52 ( 0.21 - 10.79 )	1.52 ( 0.18 )	1.52 ( 0.29 )	0.6 ( -1.44 )
Hyperglycaemia	1	0.47 ( 0.07 - 3.32 )	0.47 ( 0.61 )	0.47 ( 0.09 )	-1.1 ( -3.14 )
Blood Albumin Decreased	1	2.53 ( 0.36 - 17.96 )	2.53 ( 0.92 )	2.53 ( 0.49 )	1.34 ( -0.71 )
Elective Surgery	1	95.45 ( 13.1 - 695.47 )	95.42 ( 91.04 )	93 ( 17.65 )	6.54 ( 4.45 )
Hordeolum	1	3.63 ( 0.51 - 25.83 )	3.63 ( 1.91 )	3.63 ( 0.7 )	1.86 ( -0.18 )
Ocular Icterus	1	6.44 ( 0.91 - 45.83 )	6.44 ( 4.59 )	6.43 ( 1.25 )	2.69 ( 0.64 )
Vulval Disorder	1	28.56 ( 3.99 - 204.4 )	28.55 ( 26.38 )	28.34 ( 5.46 )	4.82 ( 2.77 )
Microcytosis	1	71.12 ( 9.83 - 514.84 )	71.1 ( 67.79 )	69.75 ( 13.31 )	6.12 ( 4.05 )
Respiratory Tract Infection	1	0.61 ( 0.09 - 4.32 )	0.61 ( 0.25 )	0.61 ( 0.12 )	-0.72 ( -2.76 )
Thrombocytopenia	1	0.11 ( 0.01 - 0.76 )	0.11 ( 7.5 )	0.11 ( 0.02 )	-3.23 ( -5.27 )
Daydreaming	1	25.37 ( 3.55 - 181.37 )	25.36 ( 23.23 )	25.19 ( 4.86 )	4.65 ( 2.6 )
Steatorrhoea	1	22.53 ( 3.15 - 160.97 )	22.52 ( 20.44 )	22.39 ( 4.32 )	4.48 ( 2.43 )
Oropharyngeal Discomfort	1	1.88 ( 0.26 - 13.34 )	1.88 ( 0.41 )	1.88 ( 0.36 )	0.91 ( -1.13 )
Routine Health Maintenance	1	1813.65 ( 164.41 - 20007.35 )	1813.06 ( 1207.37 )	1209.04 ( 162.19 )	10.24 ( 7.74 )
Oesophageal Infection	1	35.56 ( 4.96 - 254.97 )	35.55 ( 33.25 )	35.21 ( 6.77 )	5.14 ( 3.08 )
Pharyngitis	1	1.66 ( 0.23 - 11.78 )	1.66 ( 0.26 )	1.66 ( 0.32 )	0.73 ( -1.31 )
Hiatus Hernia	1	2.51 ( 0.35 - 17.85 )	2.51 ( 0.91 )	2.51 ( 0.49 )	1.33 ( -0.71 )
Hernia	1	1.63 ( 0.23 - 11.58 )	1.63 ( 0.24 )	1.63 ( 0.32 )	0.7 ( -1.34 )
Lower Limb Fracture	1	1.41 ( 0.2 - 9.99 )	1.41 ( 0.12 )	1.41 ( 0.27 )	0.49 ( -1.55 )
Rash Maculo-Papular	1	0.51 ( 0.07 - 3.63 )	0.51 ( 0.47 )	0.51 ( 0.1 )	-0.97 ( -3.01 )
Pulmonary Embolism	1	0.22 ( 0.03 - 1.53 )	0.22 ( 2.85 )	0.22 ( 0.04 )	-2.21 ( -4.25 )
Myocardial Necrosis Marker Increased	1	9.14 ( 1.28 - 65.04 )	9.13 ( 7.23 )	9.11 ( 1.76 )	3.19 ( 1.14 )
Extrasystoles	1	4.56 ( 0.64 - 32.4 )	4.56 ( 2.77 )	4.55 ( 0.88 )	2.19 ( 0.14 )
Vaginal Infection	1	4.77 ( 0.67 - 33.89 )	4.76 ( 2.97 )	4.76 ( 0.92 )	2.25 ( 0.21 )
Musculoskeletal Discomfort	1	1.47 ( 0.21 - 10.44 )	1.47 ( 0.15 )	1.47 ( 0.28 )	0.56 ( -1.49 )
Hypothalamo-Pituitary Disorder	1	9 ( 1.26 - 64.07 )	9 ( 7.09 )	8.98 ( 1.74 )	3.17 ( 1.12 )
Tearfulness	1	6.87 ( 0.97 - 48.88 )	6.87 ( 5 )	6.86 ( 1.33 )	2.78 ( 0.73 )
Vaginal Ph Abnormal	1	1209.1 ( 125.73 - 11627.39 )	1208.71 ( 905.03 )	906.78 ( 136.45 )	9.82 ( 7.41 )
Pulmonary Mass	1	1.09 ( 0.15 - 7.72 )	1.09 ( 0.01 )	1.09 ( 0.21 )	0.12 ( -1.92 )
Dysstasia	1	1.25 ( 0.18 - 8.89 )	1.25 ( 0.05 )	1.25 ( 0.24 )	0.32 ( -1.72 )
Investigation Abnormal	1	11.23 ( 1.58 - 79.99 )	11.23 ( 9.29 )	11.19 ( 2.17 )	3.48 ( 1.44 )
Respiration Abnormal	1	2.58 ( 0.36 - 18.32 )	2.58 ( 0.96 )	2.58 ( 0.5 )	1.37 ( -0.68 )
Ephelides	1	65.95 ( 9.12 - 476.73 )	65.93 ( 62.8 )	64.77 ( 12.38 )	6.02 ( 3.94 )
Sucrose Intolerance	1	604.55 ( 72.76 - 5023.18 )	604.35 ( 516.3 )	518.16 ( 88.11 )	9.02 ( 6.74 )
Nutritional Condition Abnormal	1	23.1 ( 3.23 - 165.1 )	23.1 ( 21.01 )	22.96 ( 4.43 )	4.52 ( 2.47 )
Blood Sodium Increased	1	9.02 ( 1.27 - 64.23 )	9.02 ( 7.11 )	9 ( 1.74 )	3.17 ( 1.12 )
Diabetes Insipidus	1	4.55 ( 0.64 - 32.32 )	4.54 ( 2.76 )	4.54 ( 0.88 )	2.18 ( 0.14 )
Coordination Abnormal	1	3.04 ( 0.43 - 21.57 )	3.03 ( 1.36 )	3.03 ( 0.59 )	1.6 ( -0.44 )
Glioblastoma	1	7.85 ( 1.1 - 55.87 )	7.85 ( 5.96 )	7.83 ( 1.52 )	2.97 ( 0.92 )
Therapeutic Product Effect Decreased	1	0.21 ( 0.03 - 1.51 )	0.21 ( 2.93 )	0.21 ( 0.04 )	-2.24 ( -4.28 )
Product Supply Issue	1	2.62 ( 0.37 - 18.65 )	2.62 ( 1 )	2.62 ( 0.51 )	1.39 ( -0.65 )
Synovectomy	1	129.55 ( 17.62 - 952.45 )	129.5 ( 123.12 )	125.07 ( 23.56 )	6.97 ( 4.86 )
Uterine Spasm	1	14.39 ( 2.02 - 102.62 )	14.39 ( 12.41 )	14.34 ( 2.77 )	3.84 ( 1.79 )
Upper-Airway Cough Syndrome	1	2.67 ( 0.38 - 18.99 )	2.67 ( 1.05 )	2.67 ( 0.52 )	1.42 ( -0.63 )
Post Micturition Dribble	1	329.75 ( 42.56 - 2554.99 )	329.65 ( 300.35 )	302.26 ( 54.49 )	8.24 ( 6.05 )
Acute Kidney Injury	1	0.07 ( 0.01 - 0.49 )	0.07 ( 12.69 )	0.07 ( 0.01 )	-3.86 ( -5.91 )
Complication Associated With Device	1	0.97 ( 0.14 - 6.89 )	0.97 ( 0 )	0.97 ( 0.19 )	-0.04 ( -2.09 )
Restless Legs Syndrome	1	1.47 ( 0.21 - 10.47 )	1.47 ( 0.15 )	1.47 ( 0.29 )	0.56 ( -1.48 )
Multiple Sclerosis	1	0.73 ( 0.1 - 5.22 )	0.73 ( 0.1 )	0.73 ( 0.14 )	-0.44 ( -2.49 )
Feeling Of Body Temperature Change	1	6.07 ( 0.85 - 43.14 )	6.06 ( 4.22 )	6.06 ( 1.17 )	2.6 ( 0.55 )
Rheumatoid Arthritis	1	0.12 ( 0.02 - 0.85 )	0.12 ( 6.43 )	0.12 ( 0.02 )	-3.05 ( -5.09 )
Impaired Work Ability	1	1.9 ( 0.27 - 13.48 )	1.9 ( 0.42 )	1.9 ( 0.37 )	0.92 ( -1.12 )
Monocyte Count Decreased	1	11.81 ( 1.66 - 84.17 )	11.81 ( 9.86 )	11.78 ( 2.28 )	3.56 ( 1.51 )
Dermatitis	1	0.91 ( 0.13 - 6.49 )	0.91 ( 0.01 )	0.91 ( 0.18 )	-0.13 ( -2.17 )
Cranioplasty	1	329.75 ( 42.56 - 2554.99 )	329.65 ( 300.35 )	302.26 ( 54.49 )	8.24 ( 6.05 )
Dyshidrotic Eczema	1	20.26 ( 2.84 - 144.69 )	20.26 ( 18.21 )	20.15 ( 3.89 )	4.33 ( 2.28 )
Musculoskeletal Pain	1	0.56 ( 0.08 - 3.95 )	0.56 ( 0.35 )	0.56 ( 0.11 )	-0.85 ( -2.89 )
Toxicity To Various Agents	1	0.07 ( 0.01 - 0.49 )	0.07 ( 12.58 )	0.07 ( 0.01 )	-3.85 ( -5.89 )
Oral Surgery	1	15.43 ( 2.16 - 110.07 )	15.43 ( 13.44 )	15.37 ( 2.97 )	3.94 ( 1.89 )
Viral Infection	1	0.71 ( 0.1 - 5.03 )	0.71 ( 0.12 )	0.71 ( 0.14 )	-0.5 ( -2.54 )
Blood Albumin Abnormal	1	24.34 ( 3.41 - 174.02 )	24.34 ( 22.23 )	24.18 ( 4.66 )	4.6 ( 2.54 )
Aphthous Ulcer	1	1.28 ( 0.18 - 9.09 )	1.28 ( 0.06 )	1.28 ( 0.25 )	0.36 ( -1.69 )
Fungal Infection	1	0.62 ( 0.09 - 4.4 )	0.62 ( 0.23 )	0.62 ( 0.12 )	-0.69 ( -2.73 )
Leukopenia	1	0.24 ( 0.03 - 1.72 )	0.24 ( 2.38 )	0.24 ( 0.05 )	-2.05 ( -4.09 )
Blindness	1	0.74 ( 0.1 - 5.27 )	0.74 ( 0.09 )	0.74 ( 0.14 )	-0.43 ( -2.47 )
Pelvic Fracture	1	3.24 ( 0.46 - 23.06 )	3.24 ( 1.55 )	3.24 ( 0.63 )	1.7 ( -0.35 )
Neoplasm Recurrence	1	5.08 ( 0.71 - 36.13 )	5.08 ( 3.27 )	5.07 ( 0.98 )	2.34 ( 0.3 )
Social Problem	1	11.37 ( 1.6 - 81 )	11.37 ( 9.43 )	11.33 ( 2.19 )	3.5 ( 1.46 )
Splenic Rupture	1	10.73 ( 1.51 - 76.43 )	10.73 ( 8.8 )	10.7 ( 2.07 )	3.42 ( 1.37 )
Mediastinal Mass	1	45.34 ( 6.31 - 325.95 )	45.33 ( 42.81 )	44.78 ( 8.6 )	5.48 ( 3.42 )
Muscular Weakness	1	0.23 ( 0.03 - 1.64 )	0.23 ( 2.55 )	0.23 ( 0.04 )	-2.11 ( -4.15 )
Haemorrhagic Ascites	1	68.44 ( 9.46 - 495.05 )	68.42 ( 65.2 )	67.17 ( 12.83 )	6.07 ( 3.99 )
Tumour Flare	1	22.67 ( 3.17 - 161.98 )	22.66 ( 20.58 )	22.53 ( 4.35 )	4.49 ( 2.44 )
Wrong Technique In Product Usage Process	1	0.12 ( 0.02 - 0.87 )	0.12 ( 6.3 )	0.12 ( 0.02 )	-3.03 ( -5.07 )
Therapeutic Response Changed	1	9.16 ( 1.29 - 65.21 )	9.16 ( 7.25 )	9.14 ( 1.77 )	3.19 ( 1.15 )
Dysgraphia	1	5.64 ( 0.79 - 40.12 )	5.64 ( 3.81 )	5.63 ( 1.09 )	2.49 ( 0.45 )
Prescribed Underdose	1	0.82 ( 0.12 - 5.85 )	0.82 ( 0.04 )	0.82 ( 0.16 )	-0.28 ( -2.32 )
Rash Papular	1	1.34 ( 0.19 - 9.51 )	1.34 ( 0.09 )	1.34 ( 0.26 )	0.42 ( -1.62 )
Hypogeusia	1	15.63 ( 2.19 - 111.5 )	15.63 ( 13.64 )	15.57 ( 3.01 )	3.96 ( 1.91 )
Vanishing Bile Duct Syndrome	1	10.39 ( 1.46 - 74.01 )	10.39 ( 8.46 )	10.36 ( 2.01 )	3.37 ( 1.33 )
Thyroxine Decreased	1	41.69 ( 5.81 - 299.43 )	41.68 ( 39.25 )	41.22 ( 7.92 )	5.37 ( 3.3 )
Blood Thyroid Stimulating Hormone Increased	1	2.6 ( 0.37 - 18.46 )	2.6 ( 0.98 )	2.6 ( 0.5 )	1.38 ( -0.67 )
Brain Fog	1	2.31 ( 0.32 - 16.39 )	2.31 ( 0.74 )	2.31 ( 0.45 )	1.21 ( -0.84 )
Melanocytic Hyperplasia	1	403.03 ( 51.04 - 3182.24 )	402.9 ( 360.81 )	362.71 ( 64.37 )	8.5 ( 6.28 )
Hepatitis	1	0.56 ( 0.08 - 3.99 )	0.56 ( 0.34 )	0.56 ( 0.11 )	-0.83 ( -2.87 )
Feeling Cold	1	1.04 ( 0.15 - 7.4 )	1.04 ( 0 )	1.04 ( 0.2 )	0.06 ( -1.98 )
Nephropathy	1	2.5 ( 0.35 - 17.8 )	2.5 ( 0.9 )	2.5 ( 0.49 )	1.32 ( -0.72 )
Throat Irritation	1	0.56 ( 0.08 - 3.99 )	0.56 ( 0.34 )	0.56 ( 0.11 )	-0.83 ( -2.87 )
Dizziness Postural	1	2.61 ( 0.37 - 18.58 )	2.61 ( 1 )	2.61 ( 0.51 )	1.39 ( -0.66 )
Lung Operation	1	34.55 ( 4.82 - 247.62 )	34.53 ( 32.26 )	34.22 ( 6.58 )	5.1 ( 3.04 )
Heart Rate Increased	1	0.26 ( 0.04 - 1.84 )	0.26 ( 2.11 )	0.26 ( 0.05 )	-1.94 ( -3.98 )
Mental Fatigue	1	17.69 ( 2.48 - 126.26 )	17.69 ( 15.67 )	17.61 ( 3.4 )	4.14 ( 2.09 )
Fracture	1	0.93 ( 0.13 - 6.57 )	0.93 ( 0.01 )	0.93 ( 0.18 )	-0.11 ( -2.15 )
Stress	1	0.37 ( 0.05 - 2.66 )	0.37 ( 1.05 )	0.37 ( 0.07 )	-1.42 ( -3.46 )
Cartilage Injury	1	17.36 ( 2.43 - 123.83 )	17.35 ( 15.33 )	17.27 ( 3.34 )	4.11 ( 2.06 )
Product Prescribing Issue	1	0.92 ( 0.13 - 6.55 )	0.92 ( 0.01 )	0.92 ( 0.18 )	-0.12 ( -2.16 )
Tooth Impacted	1	74.03 ( 10.22 - 536.27 )	74 ( 70.58 )	72.54 ( 13.84 )	6.18 ( 4.1 )
Leg Amputation	1	10.64 ( 1.49 - 75.76 )	10.63 ( 8.7 )	10.61 ( 2.05 )	3.41 ( 1.36 )
Tendon Disorder	1	4.14 ( 0.58 - 29.4 )	4.13 ( 2.37 )	4.13 ( 0.8 )	2.05 ( 0 )
Muscle Rupture	1	6.57 ( 0.92 - 46.75 )	6.57 ( 4.71 )	6.56 ( 1.27 )	2.71 ( 0.67 )
Tendon Injury	1	12.77 ( 1.79 - 91.01 )	12.77 ( 10.81 )	12.73 ( 2.46 )	3.67 ( 1.62 )
Cardiac Pacemaker Replacement	1	47.11 ( 6.55 - 338.81 )	47.09 ( 44.54 )	46.5 ( 8.92 )	5.54 ( 3.47 )
Breast Cancer	1	0.53 ( 0.08 - 3.79 )	0.53 ( 0.41 )	0.53 ( 0.1 )	-0.91 ( -2.95 )
White Blood Cell Disorder	1	6.98 ( 0.98 - 49.63 )	6.97 ( 5.11 )	6.96 ( 1.35 )	2.8 ( 0.75 )
Platelet Disorder	1	7.04 ( 0.99 - 50.11 )	7.04 ( 5.17 )	7.03 ( 1.36 )	2.81 ( 0.77 )
Product Distribution Issue	1	2.56 ( 0.36 - 18.16 )	2.56 ( 0.95 )	2.55 ( 0.5 )	1.35 ( -0.69 )
Diet Noncompliance	1	41.69 ( 5.81 - 299.43 )	41.68 ( 39.25 )	41.22 ( 7.92 )	5.37 ( 3.3 )
Back Injury	1	2.74 ( 0.39 - 19.5 )	2.74 ( 1.11 )	2.74 ( 0.53 )	1.46 ( -0.59 )
High Density Lipoprotein Decreased	1	10.08 ( 1.41 - 71.75 )	10.07 ( 8.15 )	10.05 ( 1.94 )	3.33 ( 1.28 )
Cholestasis	1	0.57 ( 0.08 - 4.05 )	0.57 ( 0.32 )	0.57 ( 0.11 )	-0.81 ( -2.85 )
